# Supplementary material for: Genomic and transcriptomic analysis unveils population evolution and development of pesticide resistance in fall armyworm Spodoptera frugiperda
Source: PubMed Central journal article supplement (PMC9226219; doi:10.1007/s13238-020-00795-7), 2020-10-27
Supplement: 13238_2020_795_MOESM1_ESM.pdf [file 13238_2020_795_MOESM1_ESM.pdf]

## Supplementary Materials for

### **Genomic and transcriptomic analysis unveils population evolution and development of pesticide resistance in fall armyworm *Spodoptera frugiperda***

Furong Gui<sup>1,12,\*</sup>, Tianming Lan<sup>2,9,\*</sup>, Yue Zhao<sup>1,\*</sup>, Wei Guo<sup>3,15,\*</sup>, Yang Dong<sup>1,12</sup>,  
Dongming Fang<sup>2</sup>, Huan Liu<sup>2,9</sup>, Haimeng Li<sup>2</sup>, Hongli Wang<sup>2</sup>, Ruoshi Hao<sup>12</sup>, Xiaofang  
Cheng<sup>5</sup>, Yahong Li<sup>16</sup>, Pengcheng Yang<sup>4</sup>, Sunil Kumar Sahu<sup>2</sup>, Yaping Chen<sup>1</sup>, Le  
Cheng<sup>7</sup>, Shuqi He<sup>1</sup>, Ping Liu<sup>5</sup>, Guangyi Fan<sup>6</sup>, Haorong Lu<sup>8,10</sup>, Guohai Hu<sup>8,10</sup>, Wei  
Dong<sup>2</sup>, Bin Chen<sup>1</sup>, Yuan Jiang<sup>18</sup>, Yongwei Zhang<sup>18</sup>, Hanhong Xu<sup>17</sup>, Fei Lin<sup>17</sup>, Bernard  
Slipper<sup>19</sup>, Alisa Postma<sup>19</sup>, Matthew Jackson<sup>19</sup>, Birhan Addisie Abate<sup>20</sup>, Kassahun Tesfaye<sup>20,21</sup>,  
Aschalew Lemma Demie<sup>20</sup>, Meseret Destaw Bayeleygne<sup>20</sup>, Dawit Tesfaye Degefu<sup>22</sup>, Feng  
Chen<sup>5</sup>, Paul K Kuria<sup>23</sup>, Zachary M Kinyua<sup>23</sup>, Tong-Xian Liu<sup>13</sup>, Huanming Yang<sup>10,11</sup>,  
Fangneng Huang<sup>14,†</sup>, Xin Liu<sup>2,10,†</sup>, Jun Sheng<sup>1,12,†</sup>, Le Kang<sup>3,4,15,†</sup>

\* Furong Gui, Tianming Lan, Yue Zhao and Wei Guo have contributed equally to this work.

†Corresponding authors. Email: Le Kang: [lkang@ioz.ac.cn](mailto:lkang@ioz.ac.cn), Jun Sheng: [shengjunpuer@163.com](mailto:shengjunpuer@163.com), Xin Liu: [liuxin@genomics.cn](mailto:liuxin@genomics.cn), Fangneng Huang: [FHuang@agcenter.lsu.edu](mailto:FHuang@agcenter.lsu.edu)

## SUPPLEMENTARY FIGURES

| Continent     |                        | Countries and regions involved | Countries and regions FAW occurred |
|---------------|------------------------|--------------------------------|------------------------------------|
| South America | Northern South America | 5                              | 5                                  |
|               | Central South America  | 3                              | 3                                  |
|               | Eastern South America  | 1                              | 1                                  |
|               | Southern south America | 4                              | 4                                  |
| North America | North America          | 4                              | 3                                  |
|               | Central America        | 7                              | 7                                  |
|               | Caribbean              | 25                             | 13                                 |
| Africa        | North Africa           | 8                              | 2                                  |
|               | East Africa            | 10                             | 10                                 |
|               | Central Africa         | 8                              | 7                                  |
|               | West Africa            | 18                             | 15                                 |
|               | South Africa           | 15                             | 15                                 |
| Asia          | West Asia              | 20                             | 3                                  |
|               | South Asia             | 7                              | 5                                  |
|               | Southeast Asia         | 11                             | 11                                 |
|               | East Asia              | 5                              | 3                                  |
|               | Central Asia           | 5                              | 0                                  |
| Oceania       |                        | 24                             | 2                                  |
| Europe        |                        | 44                             | 0                                  |
| Total         |                        | 224                            | 109                                |

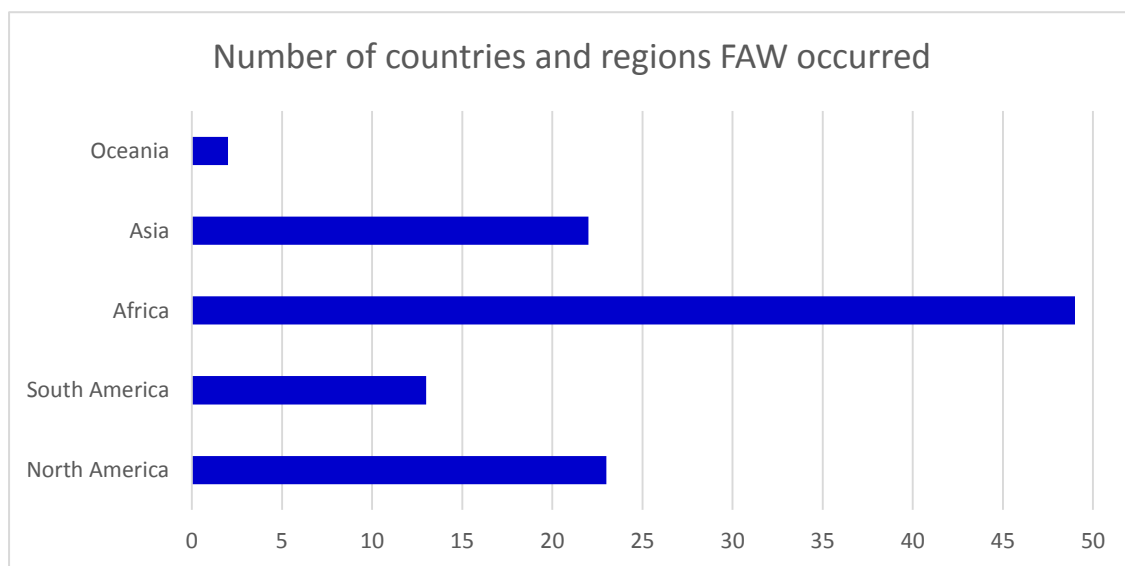

**Figure S1 | The world distribution of the Fall armyworm (FAW).**

Data source: Invasive Species Compendium. <https://www.cabi.org/isc/fallarmyworm>.

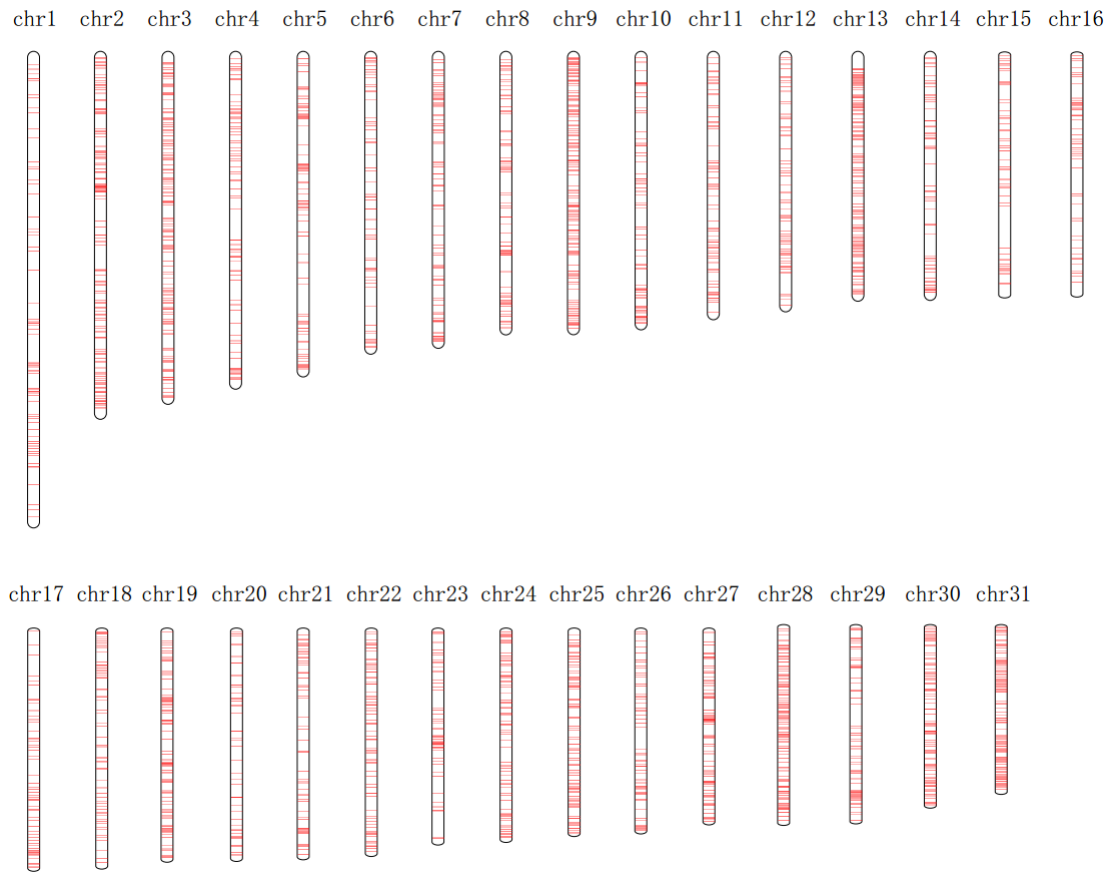

**Figure S2 | The distribution of extra regions in 31 chromosomes of fall armyworm.**

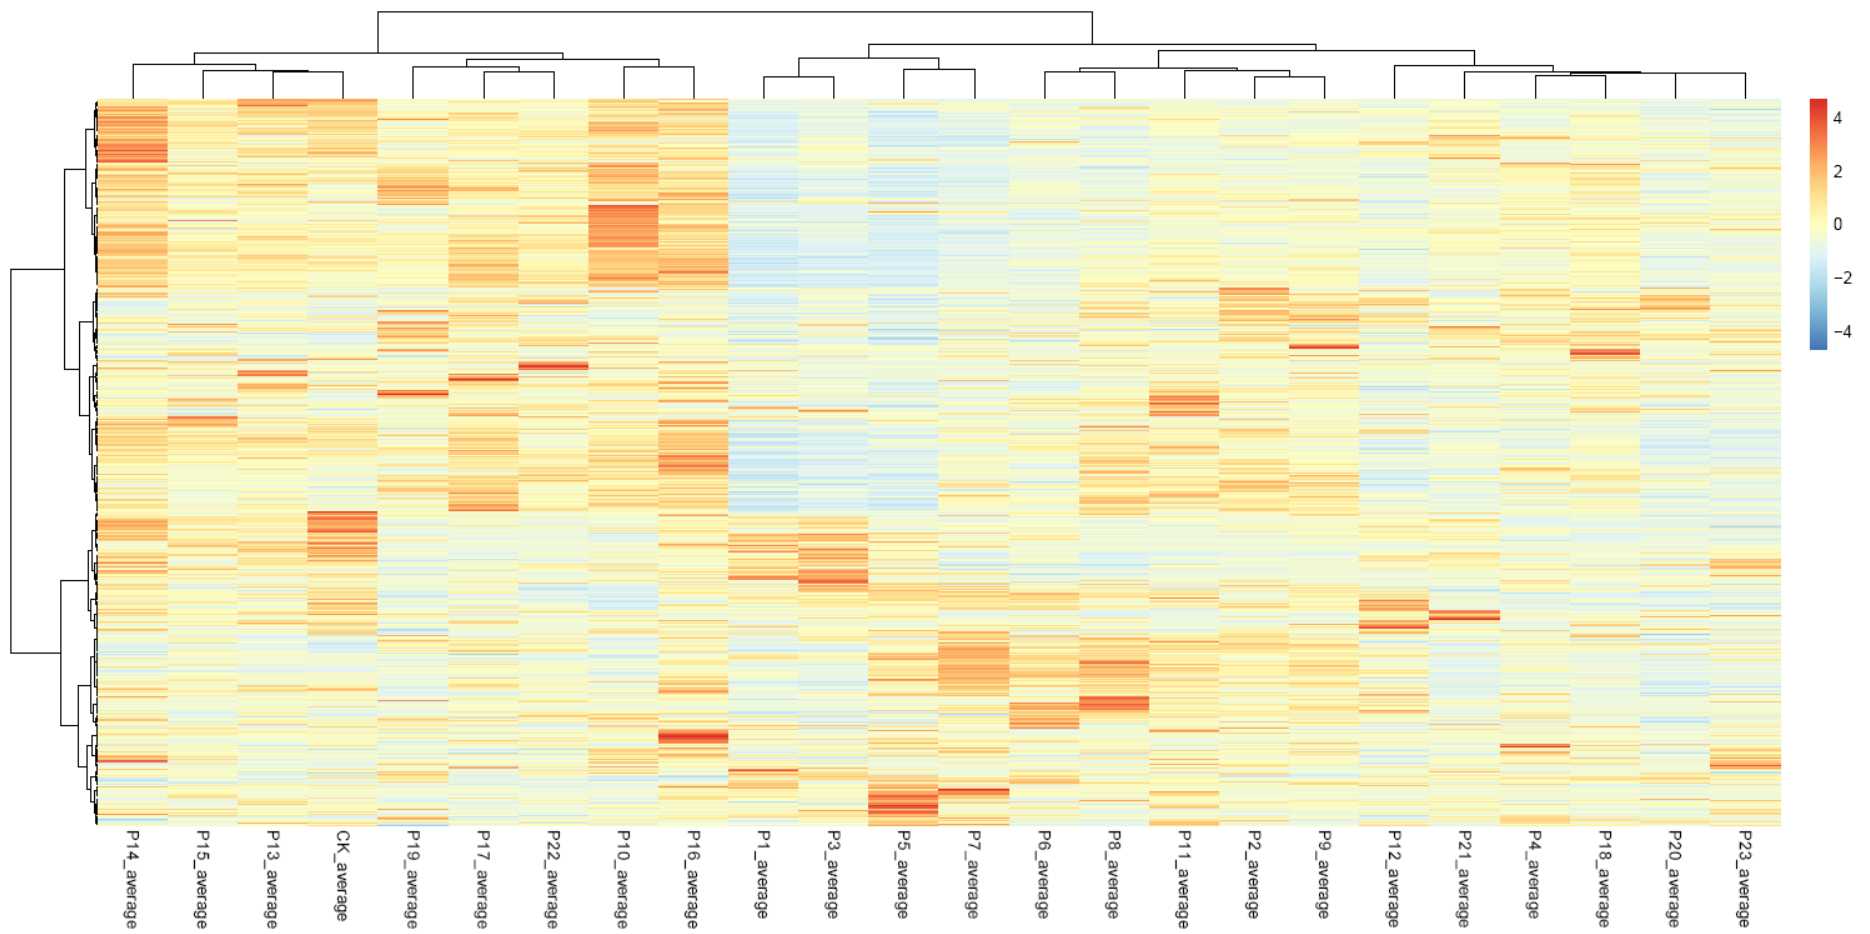

**Figure S3 | The heatmap of 1421 expressed gene between 23 pesticide treatments and control.**

Note: The heatmap shows the average value of FPKM; P1-23 represent the 23 pesticides.

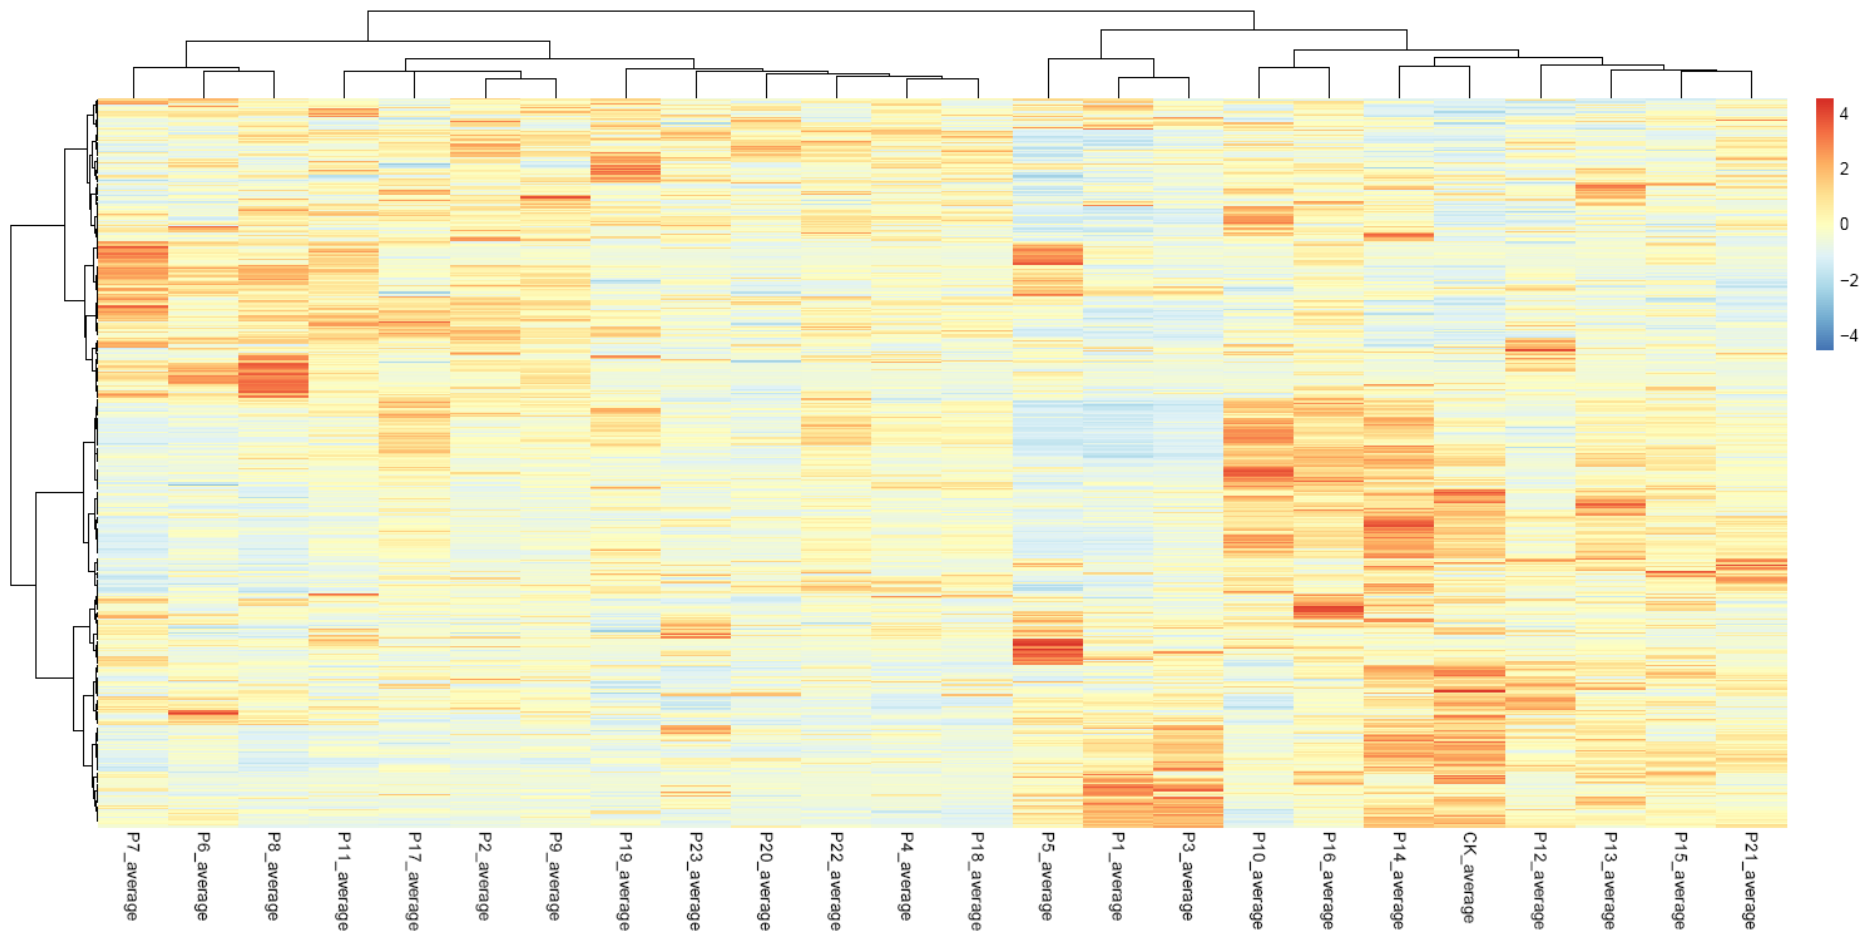

**Figure S4 | The heatmap of 512 differential expression genes (DEGs) between 23 pesticide treatments and control.**

The heatmap shows the average value of FPKM; P1-23 represent the 23 pesticides.

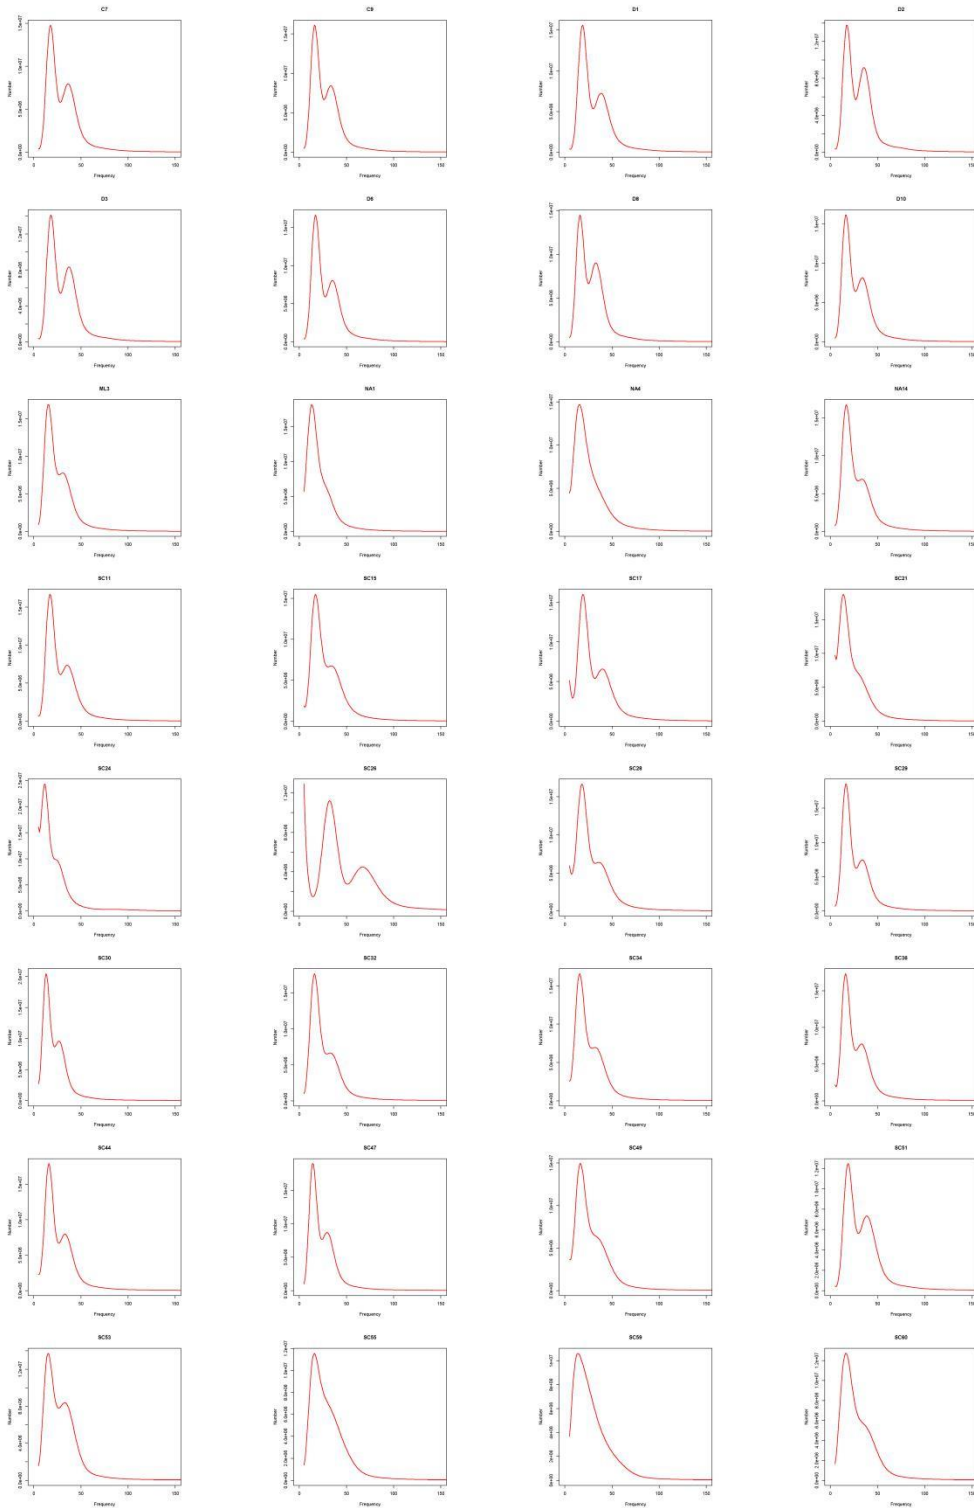

**Figure S5 | K-mer based genome survey results calculated by the GCE software.**

Note: 32 individuals with the sequencing depth larger than  $60\times$  were selected for this genome survey analysis.

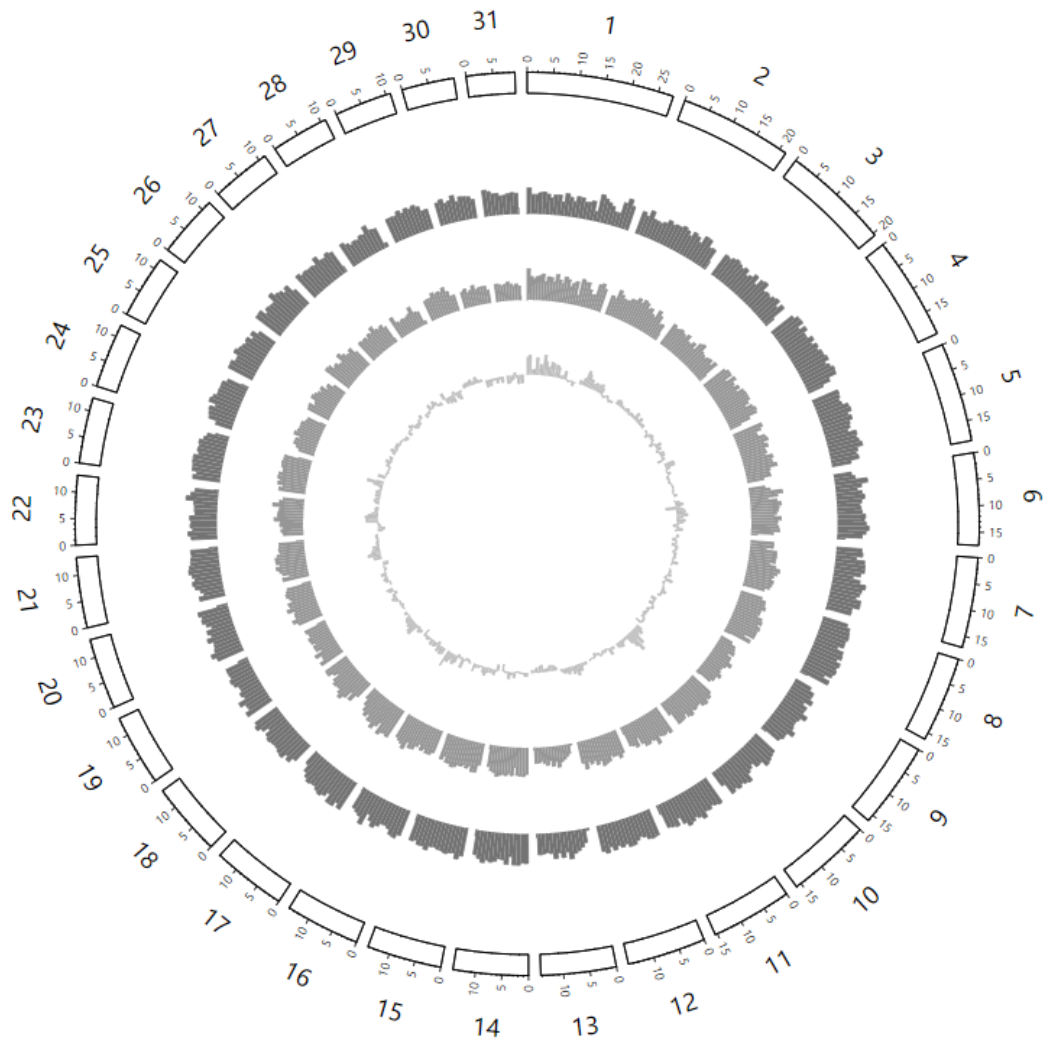

**Figure S6 | The single nucleotide polymorphism (SNP) density, total genetic diversity ( $\pi$ ) and Tajima's D across all chromosomes of the genome scaled to 1Mb size.**

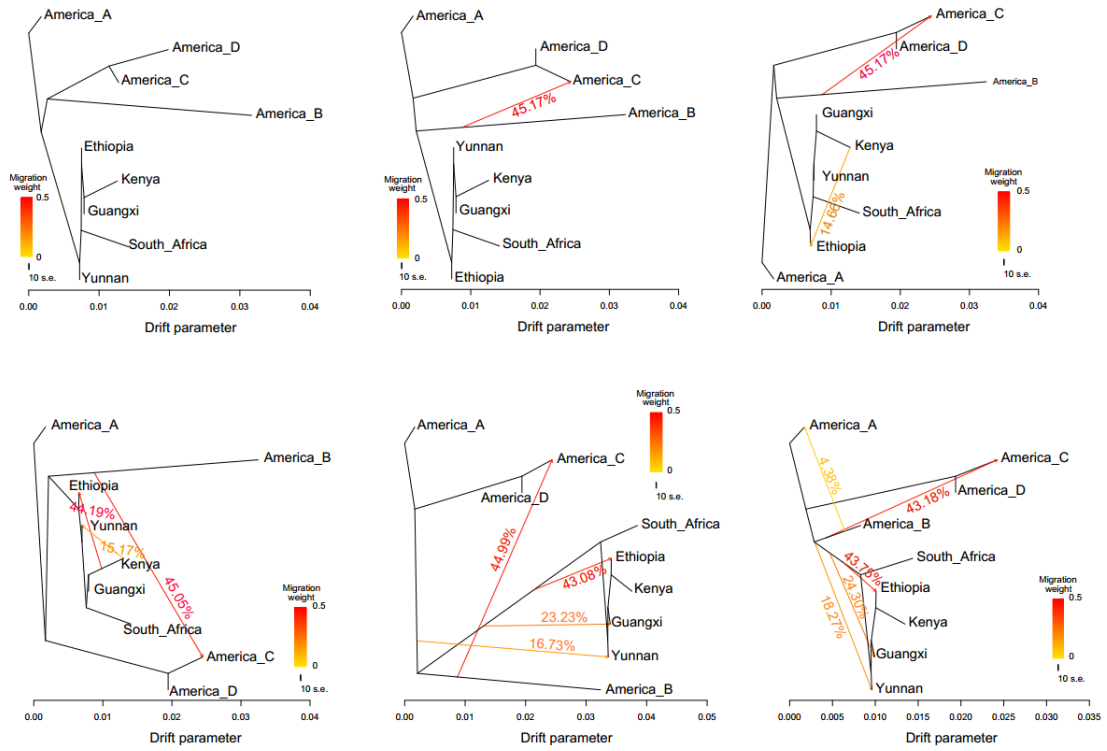

Figure S7 | The TreeMix results for models with  $m = 0$  to  $m = 5$ .



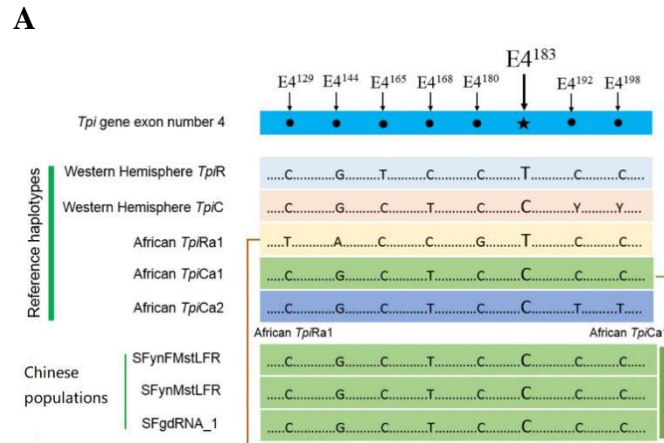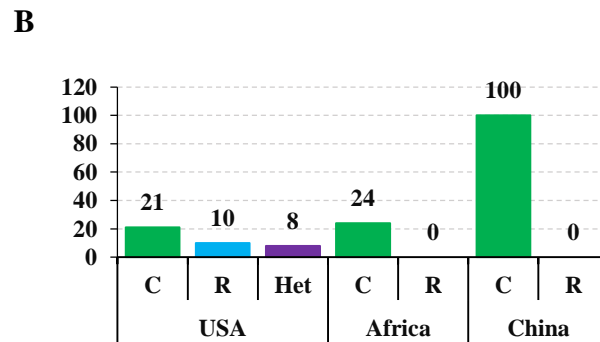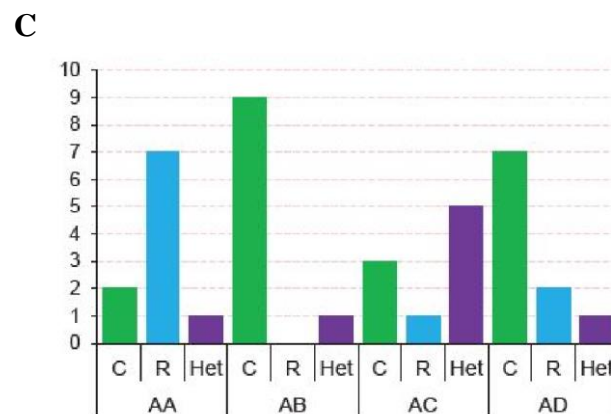

**Figure S8 | Identification of C or R strain of FAW from USA, Africa and China.**

**A:** To facilitate the understanding of identifying of C and R strain, we selected 5 reference samples to show the differences of strain-specific sites between different subtypes. We also showed these strain-specific site of Chinese populations. **B:** The statistics of the distribution of C and R strain in USA, Africa and China populations. If the TpiE4-183 is found to be heterozygous, we identified them as hybrid individuals. **C:** The statistics of the distribution of C and R strain in each population of USA. (C: C strain; R: R strain; Het: Hybrids of C and R strains; AA: American population A; AB: American population B; AC: American population C; AD: American population D).

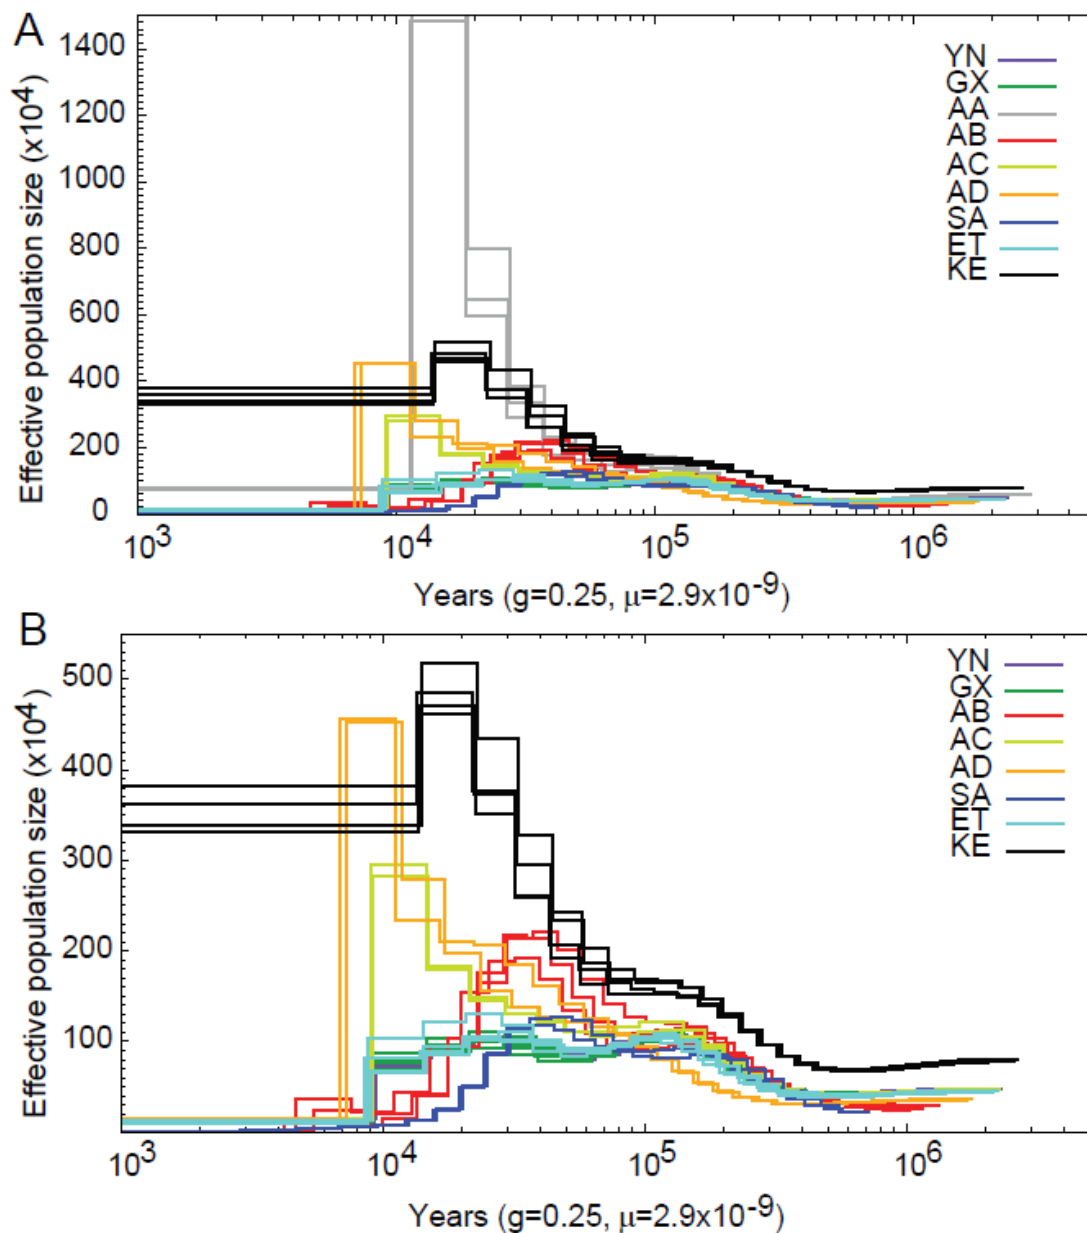

**Figure S9 | The population demography analysis of FAW populations inferred by PSMC.**

A: The PSMC results from all nine populations, including samples from America ( $n = 10$ , three from AA, three from AB, two from AC, and two from AD), Africa ( $n = 10$ , four from ET, four from KE and two from SA) and China ( $n = 10$ , five from YN and five from GX). B: To facilitate showing more detailed information, we removed the AA population from the picture A. (PSMC: pairwise sequentially Markovian coalescent; AA: American population A; AB: American population B; AC: American population C; AD: American population D; ET: Ethiopia; KE: Kenya; SA: South Africa; YN: Yunnan; GX: Guangxi.)



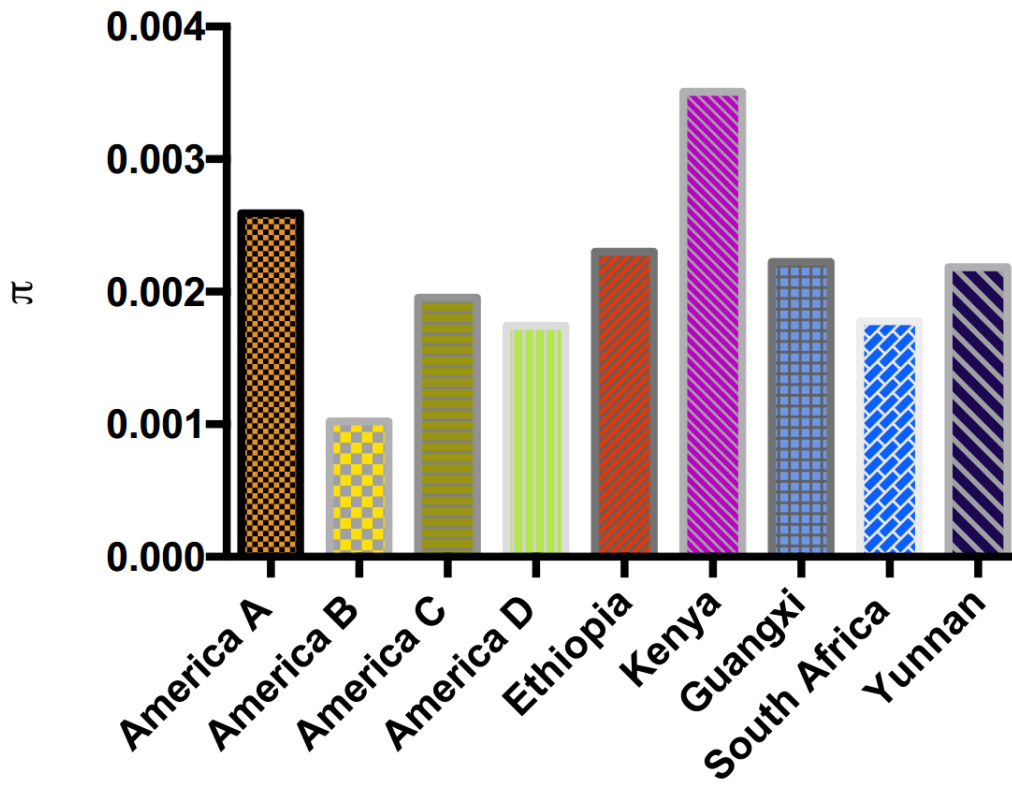

Figure S10 | The global nucleotide diversity ( $\pi$ ) of nine accessions.

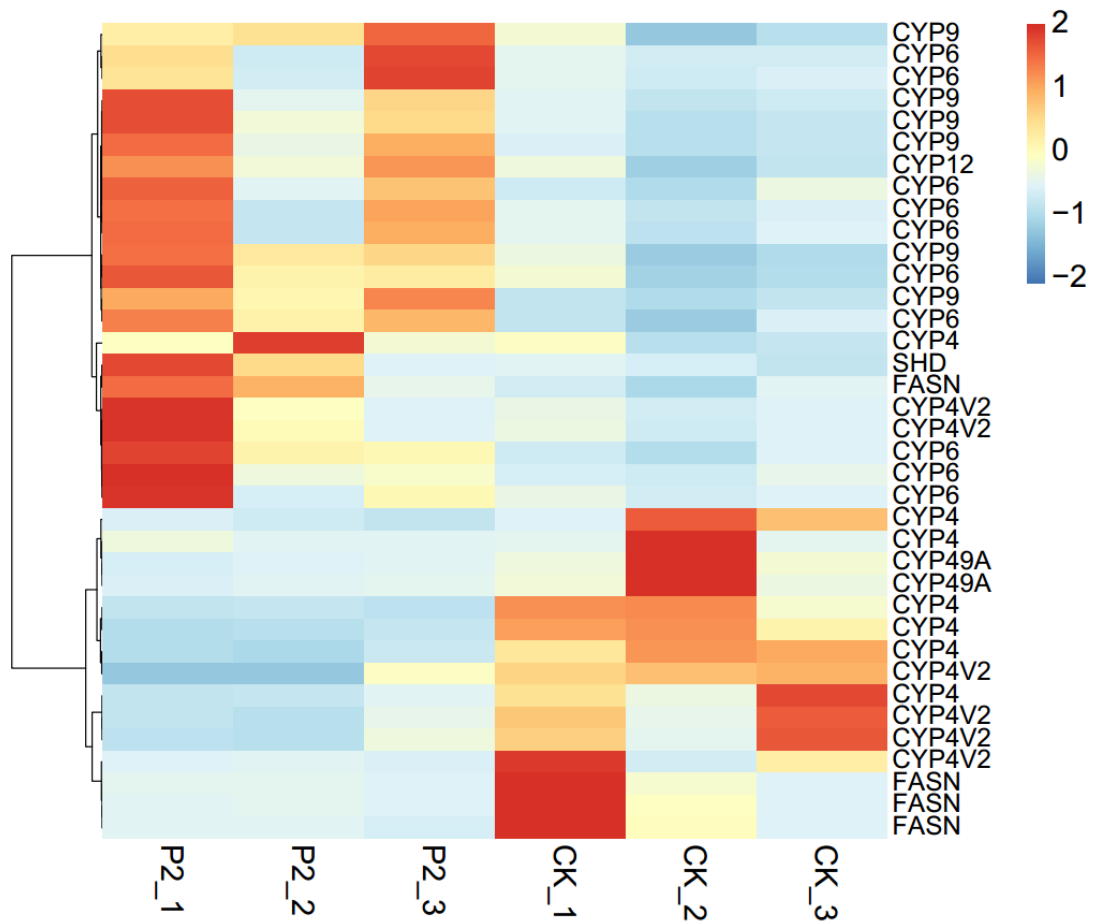

**Figure S11 | Differentially expressed *CYP* genes after *Bacillus thuringiensis* (*Bt*) treatment.**

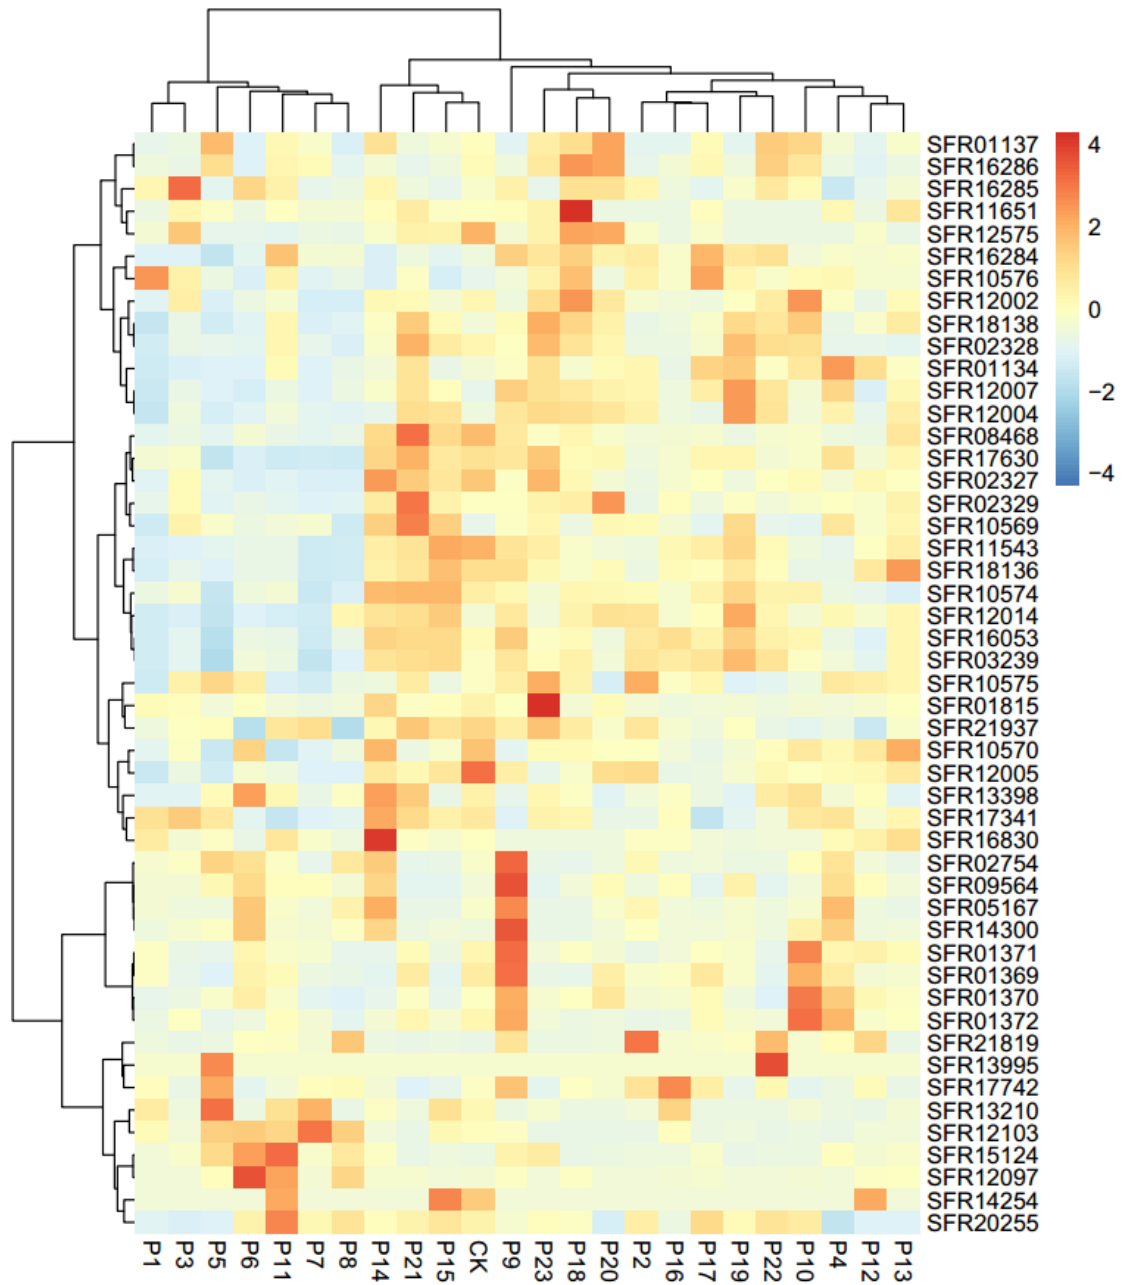

**Figure S12 | The expression of *UGT* genes between all 23 treatments and control.**

The heatmap shows the average value of FPKM.

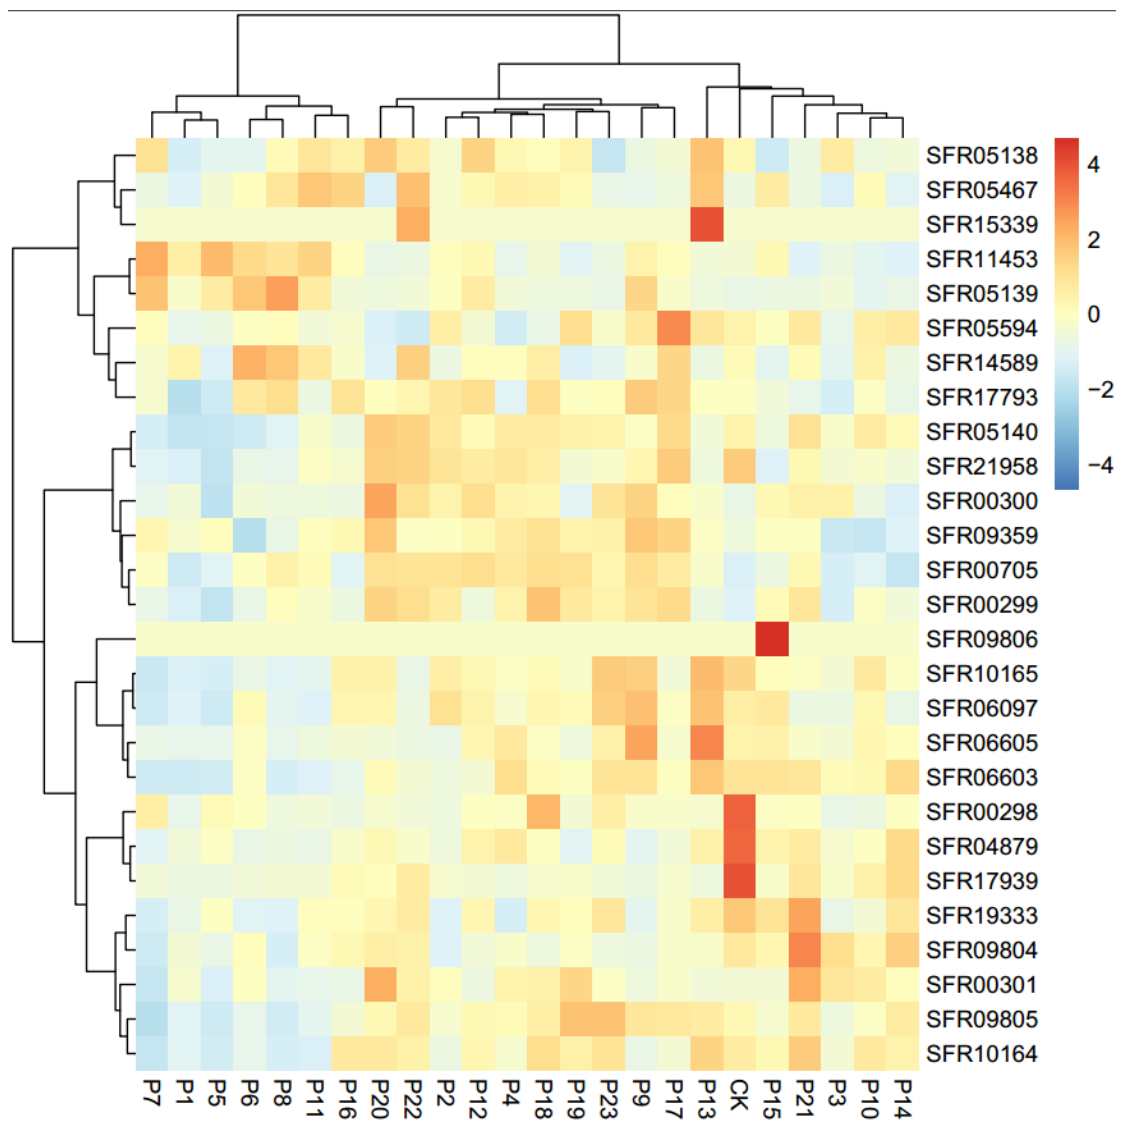

**Figure S13 | The expression of *GST* genes between all 23 treatments and control.**  
 The heatmap shows the average value of FPKM.

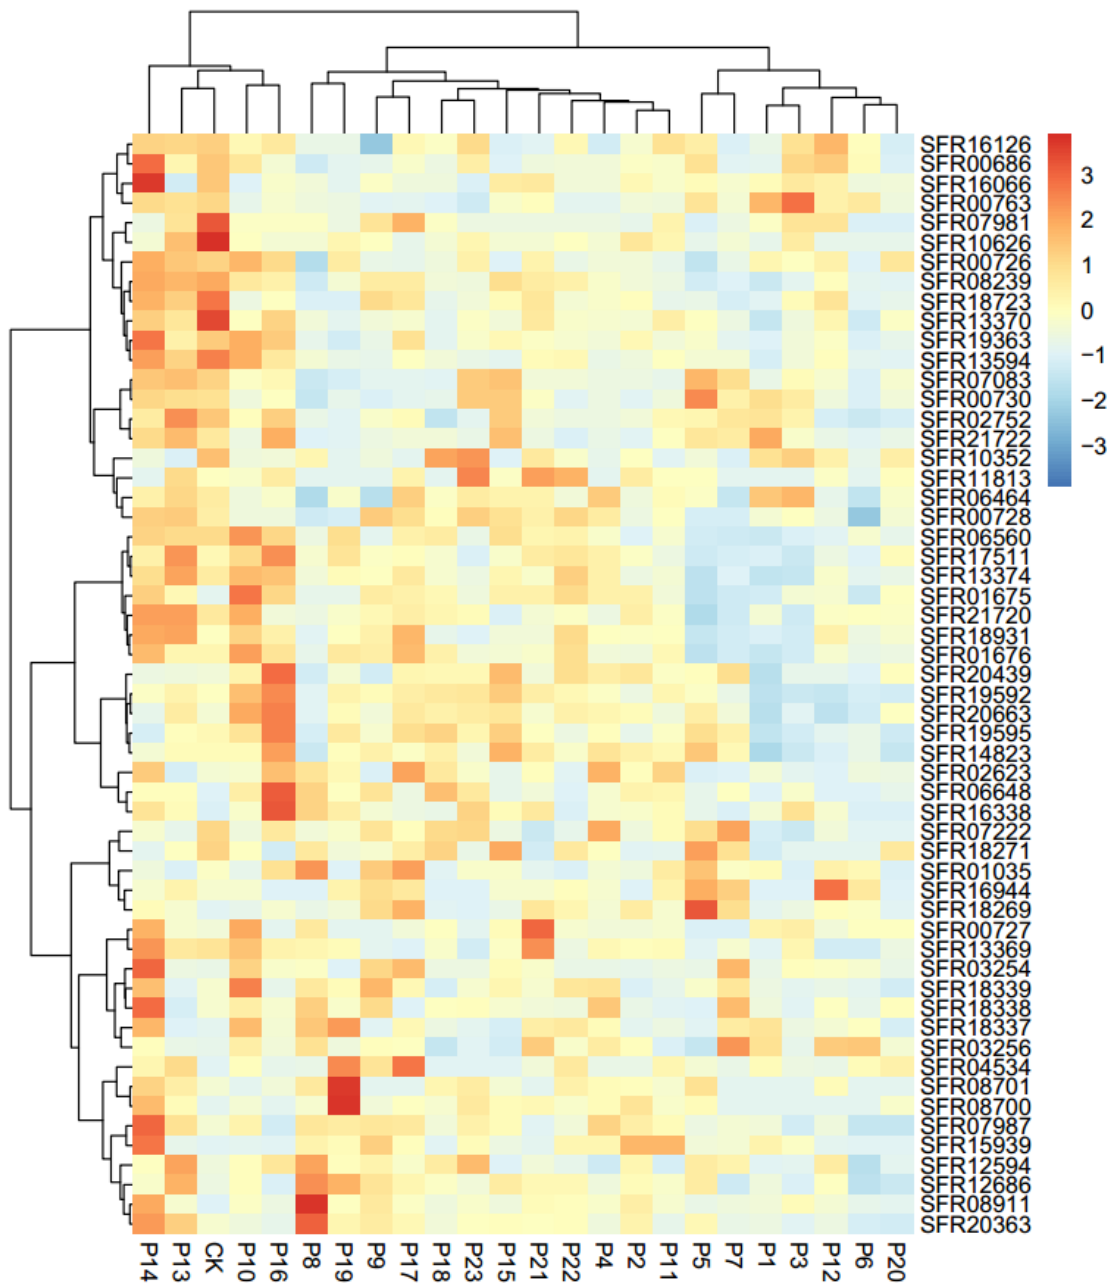

**Figure S14 | The expression of *ABCC4* and *ABCA3* genes between all 23 treatments and control.**

The heatmap shows the average value of FPKM.



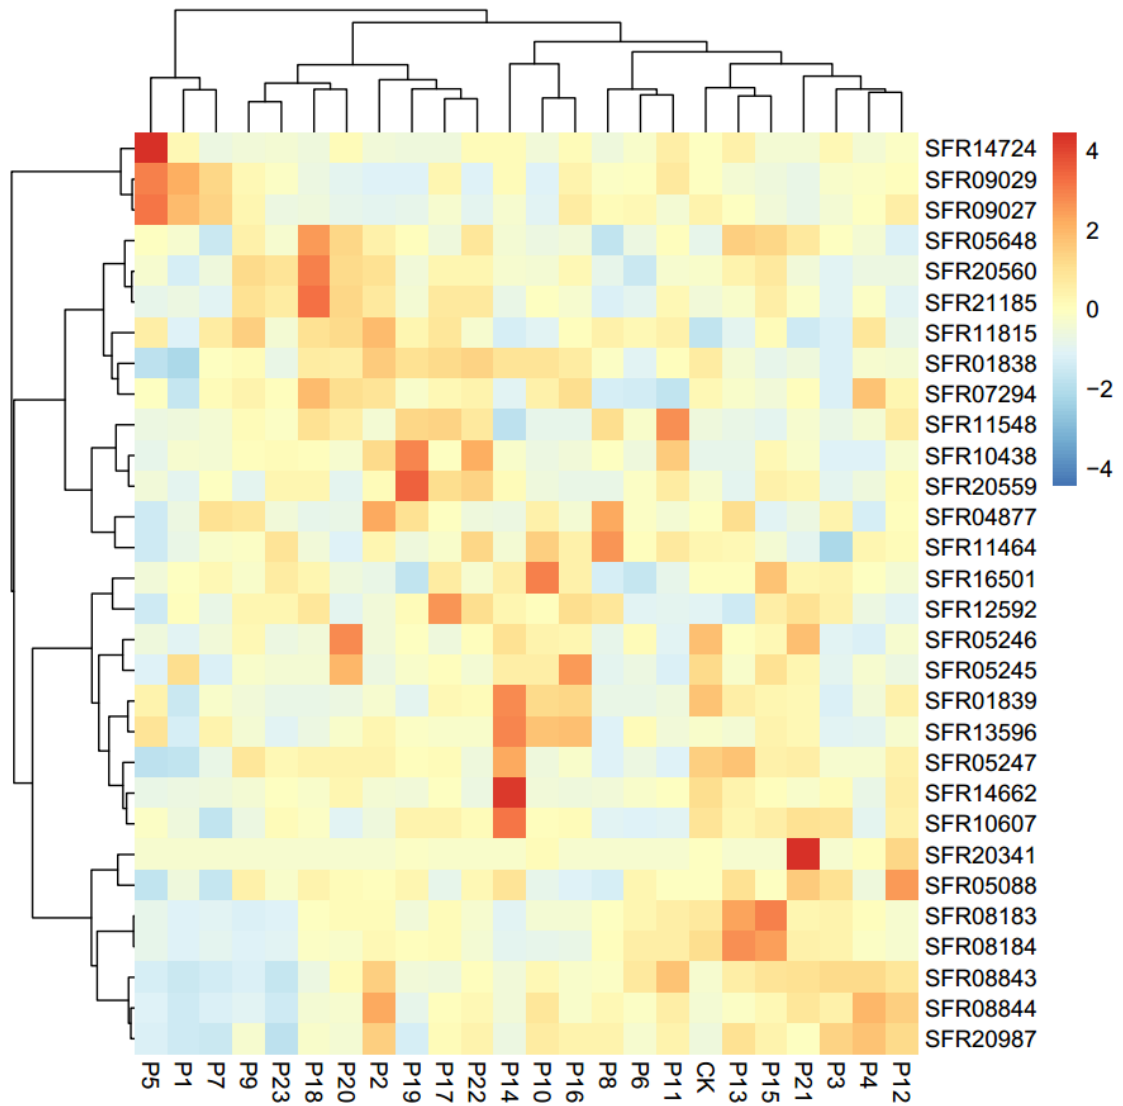

**Figure S15 | The expression of *CES1* and *CES2* genes between all 23 treatments and control.**

The heatmap shows the average value of FPKM.

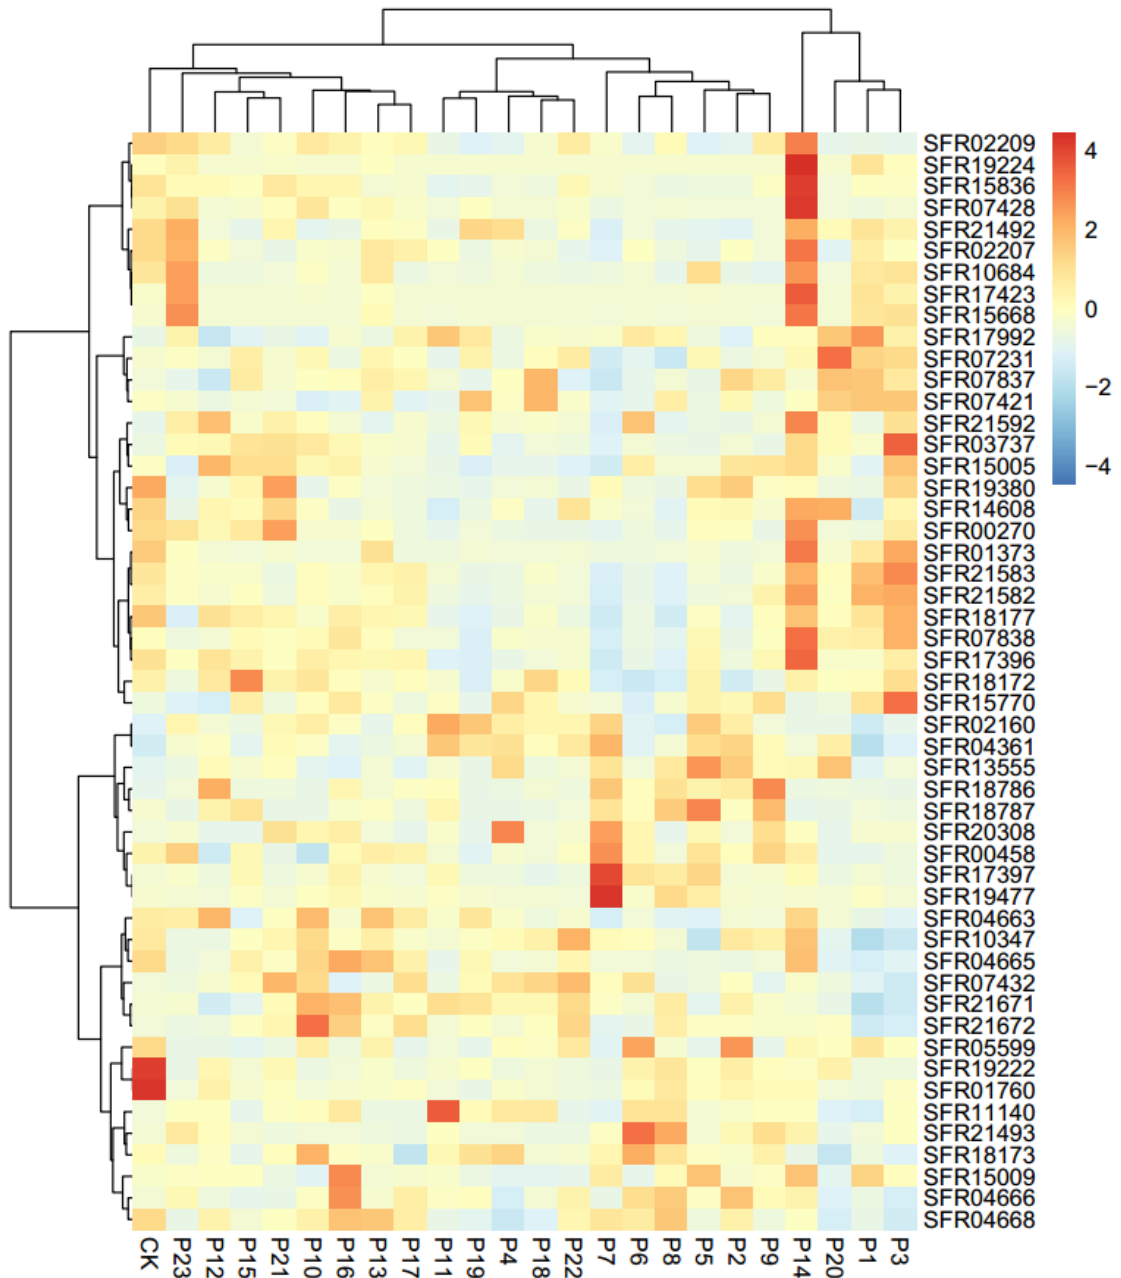

**Figure S16 | The expression of *SLC22A3*, *SLC22A4* and *SLC22A5* genes between all 23 treatments and control.**

The heatmap shows the average value of FPKM.

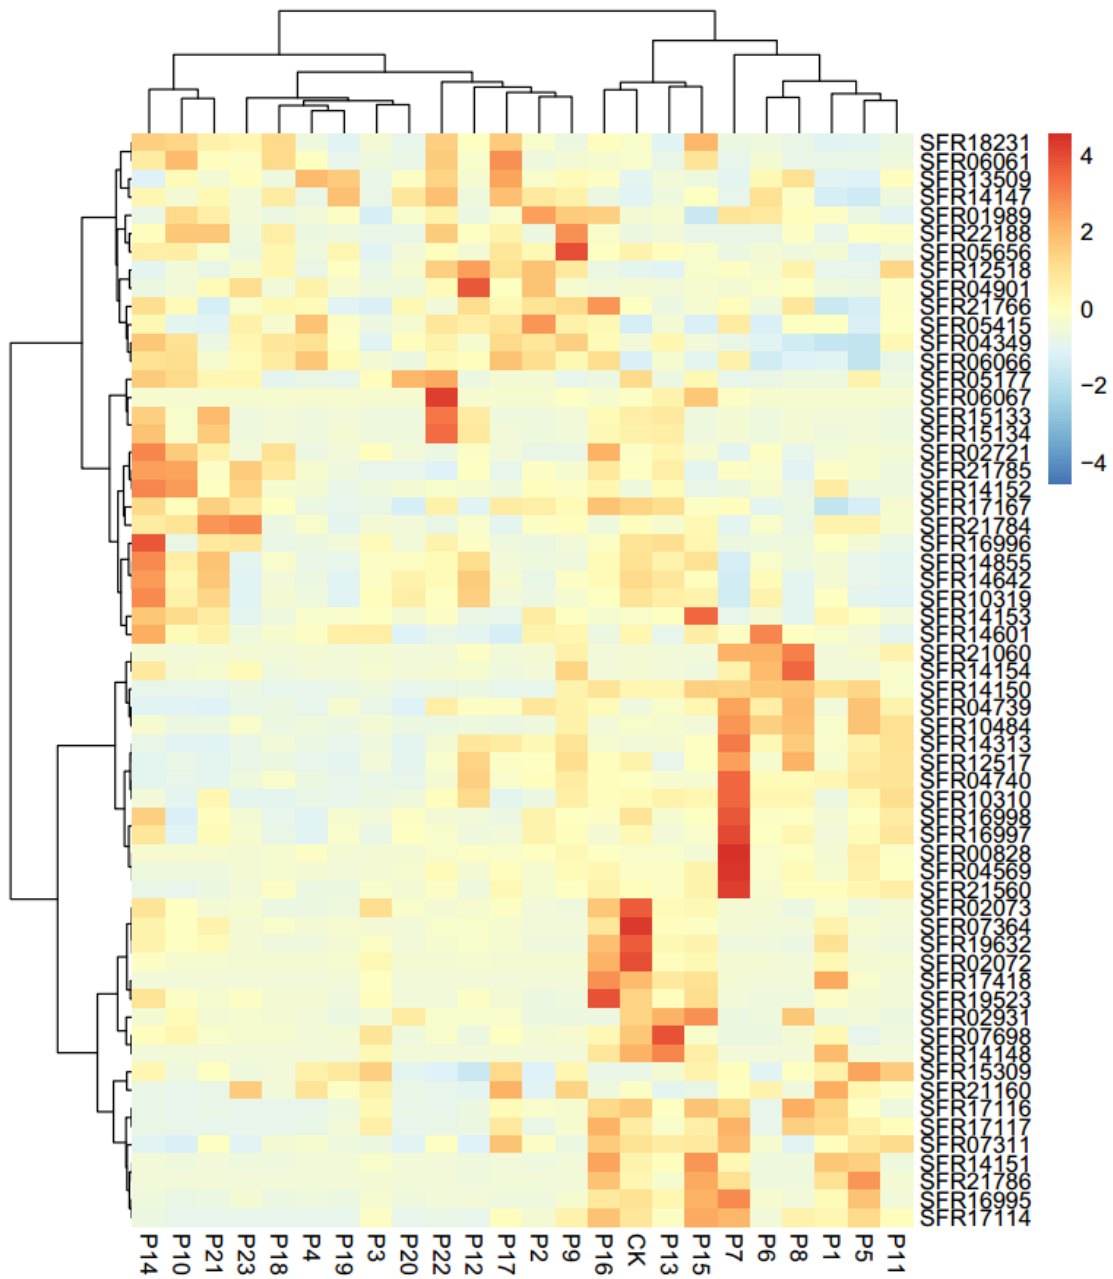

**Figure S17 | The expression of *ChuaMOX* genes between all 23 treatments and control.**

The heatmap shows the average value of FPKM.

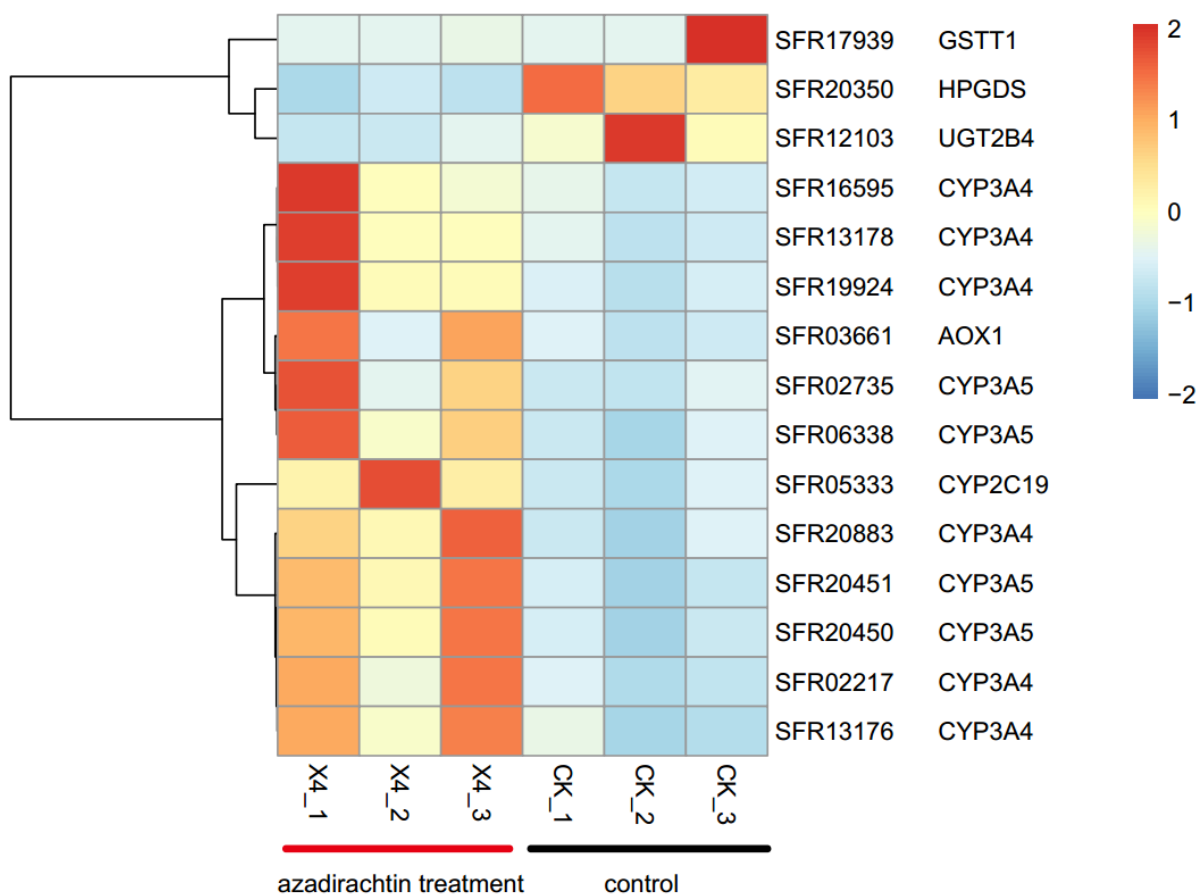

**Figure S18 | Fifteen differential expression genes that involved in hsa00982 (Drug metabolism - cytochrome P450) between azadirachtin treatment and control.**

100 Billion spores/g  
*Bacillus thuringiensis*  
suspension concentrate

100 Billion spores/ml  
*Empedobacter brevis*  
suspension concentrate

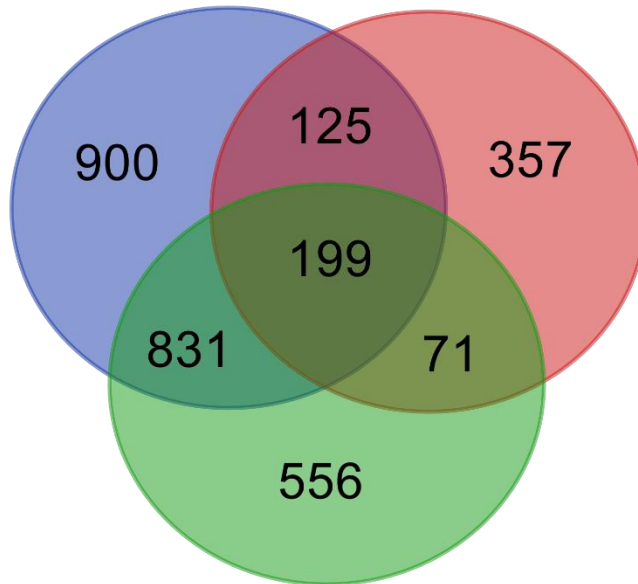

0.3% Azadirachtin  
emulsifiable concentrate

**Figure S19 | The shared differential expression genes between *Bacillus thuringiensis* (Bt), *Empedobacter brevis* and azadirachtin aim at the digestive system of FAW.**

## SUPPLEMENTARY TABLES

**Table S1 | Summary of the FAW genome sequencing data.**

|         | Sample Identifier | LibraryType | LibraryInsertSize | ReadNum (M) | BaseNum(G) | GC%   | Q10   | Q20   | Q30(total) |
|---------|-------------------|-------------|-------------------|-------------|------------|-------|-------|-------|------------|
| WGS     | SFgdWGS           | Pair-end    | 250bp             | 673.92      | 134.78     | 36.74 | 98.55 | 95.04 | 85.91      |
| stLFR   | SFynMstLFR        | Pair-end    | 300bp             | 463.49      | 56.08      | 39.76 | 97.51 | 92.85 | 82.31      |
| RNA-seq | SFgdRNA_1         | Pair-end    | 300bp             | 747.45      | 149.49     | 48.92 | 99.08 | 96.51 | 88.60      |
| RNA-seq | SFgdRNA_2         | Pair-end    | 300bp             | 680.55      | 136.11     | 45.43 | 98.73 | 95.59 | 87.16      |
| Hi-C    | SFYN              | Pair-end    | 350bp             | 874.92      | 87.49      | 39.76 | 97.51 | 92.14 | 80.78      |
| WGS     | A1                | Pair-end    | 250bp             | 86.51       | 17.30      | 36.93 | 99.79 | 98.66 | 92.63      |
| WGS     | A10               | Pair-end    | 250bp             | 125.92      | 25.18      | 37.60 | 99.85 | 98.92 | 93.46      |
| WGS     | A2                | Pair-end    | 250bp             | 78.87       | 15.78      | 37.25 | 99.76 | 98.36 | 91.36      |
| WGS     | A3                | Pair-end    | 250bp             | 97.29       | 19.46      | 37.14 | 99.84 | 98.97 | 94.03      |
| WGS     | A4                | Pair-end    | 250bp             | 100.54      | 20.10      | 37.61 | 99.76 | 98.40 | 91.56      |
| WGS     | A5                | Pair-end    | 250bp             | 111.20      | 22.24      | 37.44 | 99.76 | 98.44 | 91.84      |
| WGS     | A6                | Pair-end    | 250bp             | 88.47       | 17.70      | 36.45 | 99.80 | 98.68 | 92.81      |
| WGS     | A7                | Pair-end    | 250bp             | 95.51       | 19.10      | 37.69 | 99.76 | 98.40 | 91.53      |
| WGS     | A8                | Pair-end    | 250bp             | 94.64       | 18.92      | 39.55 | 99.79 | 98.70 | 92.85      |
| WGS     | A9                | Pair-end    | 250bp             | 95.58       | 19.12      | 37.29 | 99.81 | 98.78 | 93.20      |

|     |      |          |       |        |       |       |       |       |       |
|-----|------|----------|-------|--------|-------|-------|-------|-------|-------|
| WGS | B1   | Pair-end | 250bp | 132.56 | 26.52 | 36.98 | 99.87 | 99.06 | 94.13 |
| WGS | B10  | Pair-end | 250bp | 144.66 | 28.94 | 37.82 | 99.85 | 98.89 | 93.35 |
| WGS | B2   | Pair-end | 250bp | 150.02 | 30.00 | 38.24 | 99.86 | 98.97 | 93.68 |
| WGS | B3   | Pair-end | 250bp | 125.21 | 25.04 | 37.73 | 99.86 | 99.01 | 93.91 |
| WGS | B4   | Pair-end | 250bp | 134.07 | 26.82 | 37.65 | 99.86 | 98.96 | 93.63 |
| WGS | B5   | Pair-end | 250bp | 156.40 | 31.28 | 37.73 | 99.86 | 98.96 | 93.58 |
| WGS | B6   | Pair-end | 250bp | 138.03 | 27.60 | 40.34 | 99.84 | 98.81 | 93.06 |
| WGS | B7   | Pair-end | 250bp | 139.86 | 27.98 | 37.38 | 99.85 | 98.88 | 93.28 |
| WGS | B8   | Pair-end | 250bp | 137.69 | 27.54 | 37.33 | 99.87 | 99.03 | 94.00 |
| WGS | B9   | Pair-end | 250bp | 135.25 | 27.06 | 37.12 | 99.84 | 98.88 | 93.28 |
| WGS | BS01 | Pair-end | 250bp | 83.82  | 16.76 | 37.38 | 99.74 | 98.21 | 90.81 |
| WGS | BS02 | Pair-end | 250bp | 84.97  | 17.00 | 36.73 | 99.76 | 98.39 | 91.59 |
| WGS | C1   | Pair-end | 250bp | 142.08 | 28.42 | 38.16 | 99.85 | 98.91 | 93.41 |
| WGS | C10  | Pair-end | 250bp | 147.76 | 29.56 | 36.70 | 99.86 | 98.96 | 93.59 |
| WGS | C2   | Pair-end | 250bp | 133.33 | 26.66 | 37.27 | 99.86 | 98.99 | 93.78 |
| WGS | C3   | Pair-end | 250bp | 147.10 | 29.42 | 37.01 | 99.88 | 99.14 | 94.47 |
| WGS | C4   | Pair-end | 250bp | 150.24 | 30.04 | 37.29 | 99.86 | 99.00 | 93.79 |
| WGS | C6   | Pair-end | 250bp | 146.20 | 29.24 | 36.65 | 99.85 | 98.94 | 93.50 |

|     |        |          |       |        |       |       |       |       |       |
|-----|--------|----------|-------|--------|-------|-------|-------|-------|-------|
| WGS | C7     | Pair-end | 250bp | 256.95 | 51.40 | 36.88 | 99.85 | 98.97 | 93.71 |
| WGS | C8     | Pair-end | 250bp | 137.41 | 27.48 | 36.70 | 99.85 | 98.90 | 93.36 |
| WGS | C9     | Pair-end | 250bp | 240.52 | 48.10 | 36.85 | 99.86 | 99.03 | 94.10 |
| WGS | D1     | Pair-end | 250bp | 272.39 | 54.48 | 36.92 | 99.85 | 98.95 | 93.60 |
| WGS | D10    | Pair-end | 250bp | 255.54 | 51.10 | 36.79 | 99.84 | 98.91 | 93.46 |
| WGS | D2     | Pair-end | 250bp | 243.67 | 48.74 | 36.21 | 99.84 | 98.91 | 93.44 |
| WGS | D3     | Pair-end | 250bp | 259.89 | 51.98 | 36.64 | 99.85 | 98.96 | 93.66 |
| WGS | D4     | Pair-end | 250bp | 252.74 | 50.54 | 36.68 | 99.84 | 98.84 | 93.16 |
| WGS | D5     | Pair-end | 250bp | 160.76 | 32.16 | 37.36 | 99.86 | 99.02 | 93.93 |
| WGS | D6     | Pair-end | 250bp | 253.03 | 50.60 | 36.65 | 99.86 | 99.08 | 94.33 |
| WGS | D7     | Pair-end | 250bp | 142.83 | 28.56 | 36.64 | 99.86 | 98.94 | 93.51 |
| WGS | D8     | Pair-end | 250bp | 228.92 | 45.78 | 36.80 | 99.84 | 98.91 | 93.48 |
| WGS | D9     | Pair-end | 250bp | 137.58 | 27.52 | 37.12 | 99.86 | 98.97 | 93.65 |
| WGS | FAW1.1 | Pair-end | 250bp | 105.83 | 21.16 | 37.43 | 99.74 | 98.28 | 91.09 |
| WGS | FAW1.2 | Pair-end | 250bp | 72.91  | 14.58 | 38.92 | 99.73 | 98.25 | 91.05 |
| WGS | FAW2.1 | Pair-end | 250bp | 107.93 | 21.58 | 40.32 | 99.78 | 98.67 | 92.95 |
| WGS | FAW2.2 | Pair-end | 250bp | 117.21 | 23.44 | 36.94 | 99.78 | 98.55 | 92.30 |
| WGS | FAW5.2 | Pair-end | 250bp | 86.36  | 17.28 | 36.81 | 99.78 | 98.56 | 92.16 |



|     |        |          |       |        |       |       |       |       |       |
|-----|--------|----------|-------|--------|-------|-------|-------|-------|-------|
| WGS | FJ01_1 | Pair-end | 250bp | 87.89  | 17.58 | 41.29 | 99.78 | 98.74 | 93.50 |
| WGS | FJ01_2 | Pair-end | 250bp | 77.03  | 15.40 | 36.34 | 99.83 | 98.92 | 93.91 |
| WGS | FJ01_3 | Pair-end | 250bp | 104.32 | 20.86 | 38.53 | 99.79 | 98.65 | 92.87 |
| WGS | GX01   | Pair-end | 250bp | 95.12  | 19.02 | 36.94 | 99.75 | 98.38 | 91.56 |
| WGS | GX02   | Pair-end | 250bp | 107.35 | 21.46 | 37.23 | 99.77 | 98.52 | 92.18 |
| WGS | GX03   | Pair-end | 250bp | 90.26  | 18.06 | 36.79 | 99.75 | 98.33 | 91.40 |
| WGS | GX04   | Pair-end | 250bp | 83.71  | 16.74 | 37.90 | 99.80 | 98.66 | 92.87 |
| WGS | JC01   | Pair-end | 250bp | 92.00  | 18.40 | 37.04 | 99.77 | 98.46 | 92.02 |
| WGS | KE-1   | Pair-end | 250bp | 153.64 | 30.72 | 38.23 | 99.84 | 98.98 | 93.88 |
| WGS | KE-10  | Pair-end | 250bp | 162.77 | 32.56 | 38.93 | 99.87 | 99.09 | 94.35 |
| WGS | KE-3   | Pair-end | 250bp | 144.90 | 28.98 | 37.53 | 99.87 | 99.11 | 94.41 |
| WGS | KE-4   | Pair-end | 250bp | 160.97 | 32.20 | 37.39 | 99.86 | 99.02 | 93.98 |
| WGS | KE-5   | Pair-end | 250bp | 146.09 | 29.22 | 37.42 | 99.87 | 99.13 | 94.45 |
| WGS | KE-6   | Pair-end | 250bp | 145.32 | 29.06 | 37.90 | 99.87 | 99.06 | 94.16 |
| WGS | KE-7   | Pair-end | 250bp | 138.70 | 27.74 | 37.37 | 99.87 | 99.05 | 94.13 |
| WGS | KE-8   | Pair-end | 250bp | 134.57 | 26.92 | 36.56 | 99.88 | 99.14 | 94.54 |
| WGS | KE-9   | Pair-end | 250bp | 150.52 | 30.10 | 37.18 | 99.88 | 99.11 | 94.33 |
| WGS | LJ01   | Pair-end | 250bp | 72.30  | 14.46 | 36.88 | 99.80 | 98.66 | 92.75 |

|     |        |          |       |        |       |       |       |       |       |
|-----|--------|----------|-------|--------|-------|-------|-------|-------|-------|
| WGS | LL01_2 | Pair-end | 250bp | 66.46  | 13.30 | 38.00 | 99.77 | 98.42 | 91.85 |
| WGS | LL01_3 | Pair-end | 250bp | 90.39  | 18.08 | 36.87 | 99.83 | 98.88 | 93.75 |
| WGS | LL04   | Pair-end | 250bp | 86.48  | 17.30 | 38.68 | 99.74 | 98.30 | 91.26 |
| WGS | LL05   | Pair-end | 250bp | 87.13  | 17.42 | 38.13 | 99.75 | 98.36 | 91.54 |
| WGS | LL06   | Pair-end | 250bp | 88.82  | 17.76 | 36.70 | 99.77 | 98.51 | 92.12 |
| WGS | LL09   | Pair-end | 250bp | 92.89  | 18.58 | 38.24 | 99.81 | 98.78 | 93.30 |
| WGS | MH01   | Pair-end | 250bp | 83.56  | 16.72 | 38.27 | 99.77 | 98.47 | 92.05 |
| WGS | MH03   | Pair-end | 250bp | 87.60  | 17.52 | 36.98 | 99.77 | 98.41 | 91.59 |
| WGS | ML01   | Pair-end | 250bp | 87.55  | 17.52 | 35.32 | 99.81 | 98.78 | 93.67 |
| WGS | ML01_1 | Pair-end | 250bp | 84.93  | 16.98 | 37.33 | 99.79 | 98.61 | 92.48 |
| WGS | ML01_3 | Pair-end | 250bp | 84.21  | 16.84 | 36.75 | 99.77 | 98.46 | 91.94 |
| WGS | ML1    | Pair-end | 250bp | 142.91 | 28.58 | 38.29 | 99.86 | 99.06 | 94.27 |
| WGS | ML2    | Pair-end | 250bp | 158.11 | 31.62 | 36.81 | 99.86 | 99.03 | 94.00 |
| WGS | ML3    | Pair-end | 250bp | 243.38 | 48.68 | 36.66 | 99.86 | 99.10 | 94.52 |
| WGS | ML4    | Pair-end | 250bp | 143.29 | 28.66 | 36.82 | 99.87 | 99.02 | 93.95 |
| WGS | ML5    | Pair-end | 250bp | 153.49 | 30.70 | 37.86 | 99.86 | 99.00 | 93.94 |
| WGS | MS004  | Pair-end | 250bp | 96.95  | 19.38 | 37.67 | 99.79 | 98.64 | 92.55 |
| WGS | MS03   | Pair-end | 250bp | 106.28 | 21.26 | 38.71 | 99.80 | 98.75 | 93.25 |

|     |      |          |       |        |       |       |       |       |       |
|-----|------|----------|-------|--------|-------|-------|-------|-------|-------|
| WGS | MZ01 | Pair-end | 250bp | 97.51  | 19.50 | 36.96 | 99.78 | 98.61 | 92.61 |
| WGS | NA1  | Pair-end | 250bp | 205.92 | 41.18 | 35.02 | 99.89 | 99.33 | 95.72 |
| WGS | NA12 | Pair-end | 250bp | 166.29 | 33.26 | 36.63 | 99.87 | 99.09 | 94.33 |
| WGS | NA14 | Pair-end | 250bp | 266.52 | 53.30 | 36.48 | 99.88 | 99.16 | 94.86 |
| WGS | NA15 | Pair-end | 250bp | 141.58 | 28.32 | 36.48 | 99.90 | 99.35 | 95.84 |
| WGS | NA4  | Pair-end | 250bp | 265.75 | 53.16 | 35.95 | 99.89 | 99.27 | 95.35 |
| WGS | NJ01 | Pair-end | 250bp | 89.75  | 17.96 | 38.41 | 99.80 | 98.71 | 93.02 |
| WGS | NJ02 | Pair-end | 250bp | 74.82  | 14.96 | 36.31 | 99.80 | 98.69 | 92.97 |
| WGS | NJ03 | Pair-end | 250bp | 86.14  | 17.22 | 36.84 | 99.83 | 98.90 | 93.98 |
| WGS | NJ04 | Pair-end | 250bp | 78.22  | 15.64 | 36.74 | 99.77 | 98.48 | 91.96 |
| WGS | NJ05 | Pair-end | 250bp | 97.36  | 19.48 | 38.40 | 99.74 | 98.29 | 91.22 |
| WGS | NJ06 | Pair-end | 250bp | 92.60  | 18.52 | 37.18 | 99.80 | 98.74 | 93.07 |
| WGS | NJ07 | Pair-end | 250bp | 109.93 | 21.98 | 37.01 | 99.76 | 98.43 | 91.87 |
| WGS | NJ08 | Pair-end | 250bp | 92.15  | 18.42 | 38.06 | 99.74 | 98.30 | 91.36 |
| WGS | SC03 | Pair-end | 250bp | 135.32 | 27.06 | 37.12 | 99.82 | 98.85 | 93.61 |
| WGS | SC08 | Pair-end | 250bp | 98.49  | 19.70 | 37.52 | 99.79 | 98.61 | 92.64 |
| WGS | SC10 | Pair-end | 250bp | 177.69 | 35.54 | 37.09 | 99.82 | 98.81 | 93.43 |
| WGS | SC11 | Pair-end | 250bp | 206.00 | 41.20 | 37.21 | 99.77 | 98.44 | 91.88 |

|     |      |          |       |        |       |       |       |       |       |
|-----|------|----------|-------|--------|-------|-------|-------|-------|-------|
| WGS | SC12 | Pair-end | 250bp | 122.24 | 24.44 | 37.93 | 99.77 | 98.51 | 92.12 |
| WGS | SC13 | Pair-end | 250bp | 127.80 | 25.56 | 37.84 | 99.78 | 98.59 | 92.47 |
| WGS | SC14 | Pair-end | 250bp | 129.51 | 25.90 | 37.12 | 99.78 | 98.62 | 92.58 |
| WGS | SC15 | Pair-end | 250bp | 226.83 | 45.36 | 37.70 | 99.82 | 98.87 | 93.76 |
| WGS | SC16 | Pair-end | 250bp | 145.50 | 29.10 | 39.75 | 99.76 | 98.39 | 91.62 |
| WGS | SC17 | Pair-end | 250bp | 240.67 | 48.14 | 37.58 | 99.78 | 98.53 | 92.21 |
| WGS | SC18 | Pair-end | 250bp | 337.81 | 67.56 | 37.06 | 99.77 | 98.45 | 91.95 |
| WGS | SC19 | Pair-end | 250bp | 150.28 | 30.06 | 38.19 | 99.86 | 99.02 | 93.94 |
| WGS | SC20 | Pair-end | 250bp | 89.41  | 17.88 | 37.04 | 99.83 | 98.88 | 93.61 |
| WGS | SC21 | Pair-end | 250bp | 253.68 | 50.74 | 39.07 | 99.85 | 99.00 | 94.10 |
| WGS | SC23 | Pair-end | 250bp | 134.61 | 26.92 | 39.10 | 99.86 | 99.00 | 93.91 |
| WGS | SC24 | Pair-end | 250bp | 237.15 | 47.44 | 39.98 | 99.84 | 98.93 | 93.70 |
| WGS | SC25 | Pair-end | 250bp | 93.63  | 18.72 | 36.94 | 99.81 | 98.75 | 93.02 |
| WGS | SC26 | Pair-end | 250bp | 424.67 | 84.94 | 38.23 | 99.78 | 98.56 | 92.37 |
| WGS | SC27 | Pair-end | 250bp | 153.56 | 30.72 | 39.12 | 99.79 | 98.71 | 93.16 |
| WGS | SC28 | Pair-end | 250bp | 244.21 | 48.84 | 38.70 | 99.78 | 98.59 | 92.50 |
| WGS | SC29 | Pair-end | 250bp | 194.38 | 38.88 | 36.95 | 99.77 | 98.47 | 91.92 |
| WGS | SC30 | Pair-end | 250bp | 196.85 | 39.38 | 36.81 | 99.83 | 98.84 | 93.31 |

|     |      |          |       |        |       |       |       |       |       |
|-----|------|----------|-------|--------|-------|-------|-------|-------|-------|
| WGS | SC31 | Pair-end | 250bp | 145.33 | 29.06 | 37.93 | 99.88 | 99.12 | 94.48 |
| WGS | SC32 | Pair-end | 250bp | 247.68 | 49.54 | 37.41 | 99.85 | 98.96 | 93.78 |
| WGS | SC33 | Pair-end | 250bp | 146.57 | 29.32 | 37.36 | 99.85 | 98.95 | 93.59 |
| WGS | SC34 | Pair-end | 250bp | 234.21 | 46.84 | 37.66 | 99.83 | 98.78 | 92.94 |
| WGS | SC35 | Pair-end | 250bp | 137.33 | 27.46 | 38.70 | 99.86 | 98.96 | 93.67 |
| WGS | SC36 | Pair-end | 250bp | 240.06 | 48.02 | 37.23 | 99.83 | 98.80 | 92.97 |
| WGS | SC37 | Pair-end | 250bp | 97.13  | 19.42 | 37.53 | 99.75 | 98.38 | 91.51 |
| WGS | SC38 | Pair-end | 250bp | 145.12 | 29.02 | 37.25 | 99.84 | 98.85 | 93.10 |
| WGS | SC39 | Pair-end | 250bp | 91.83  | 18.36 | 37.67 | 99.75 | 98.35 | 91.34 |
| WGS | SC40 | Pair-end | 250bp | 99.95  | 20.00 | 37.68 | 99.75 | 98.32 | 91.27 |
| WGS | SC41 | Pair-end | 250bp | 92.02  | 18.40 | 39.56 | 99.78 | 98.57 | 92.25 |
| WGS | SC42 | Pair-end | 250bp | 93.68  | 18.74 | 38.10 | 99.77 | 98.51 | 92.10 |
| WGS | SC43 | Pair-end | 250bp | 80.89  | 16.18 | 37.62 | 99.75 | 98.33 | 91.28 |
| WGS | SC44 | Pair-end | 250bp | 250.58 | 50.12 | 37.06 | 99.84 | 98.95 | 93.68 |
| WGS | SC45 | Pair-end | 250bp | 104.01 | 20.80 | 37.09 | 99.81 | 98.73 | 92.88 |
| WGS | SC46 | Pair-end | 250bp | 140.42 | 28.08 | 37.81 | 99.85 | 98.94 | 93.59 |
| WGS | SC47 | Pair-end | 250bp | 221.08 | 44.22 | 36.91 | 99.85 | 99.02 | 94.07 |
| WGS | SC48 | Pair-end | 250bp | 141.86 | 28.38 | 38.03 | 99.88 | 99.16 | 94.69 |

|     |      |          |       |        |       |       |       |       |       |
|-----|------|----------|-------|--------|-------|-------|-------|-------|-------|
| WGS | SC49 | Pair-end | 250bp | 269.68 | 53.94 | 38.12 | 99.86 | 99.02 | 94.13 |
| WGS | SC50 | Pair-end | 250bp | 146.79 | 29.36 | 39.20 | 99.85 | 98.94 | 93.60 |
| WGS | SC51 | Pair-end | 250bp | 286.84 | 57.36 | 37.20 | 99.84 | 98.92 | 93.57 |
| WGS | SC52 | Pair-end | 250bp | 137.45 | 27.50 | 37.51 | 99.86 | 98.98 | 93.81 |
| WGS | SC53 | Pair-end | 250bp | 266.34 | 53.26 | 39.21 | 99.85 | 99.02 | 94.22 |
| WGS | SC54 | Pair-end | 250bp | 140.09 | 28.02 | 38.46 | 99.86 | 99.06 | 94.19 |
| WGS | SC55 | Pair-end | 250bp | 259.09 | 51.82 | 38.44 | 99.85 | 98.97 | 93.85 |
| WGS | SC56 | Pair-end | 250bp | 142.28 | 28.46 | 38.46 | 99.88 | 99.15 | 94.62 |
| WGS | SC57 | Pair-end | 250bp | 130.97 | 26.20 | 35.45 | 99.90 | 99.28 | 95.25 |
| WGS | SC58 | Pair-end | 250bp | 143.13 | 28.62 | 40.10 | 99.87 | 99.08 | 94.28 |
| WGS | SC59 | Pair-end | 250bp | 243.84 | 48.76 | 39.51 | 99.84 | 98.98 | 93.94 |
| WGS | SC60 | Pair-end | 250bp | 253.39 | 50.68 | 38.48 | 99.84 | 98.94 | 93.76 |
| WGS | XS01 | Pair-end | 250bp | 79.53  | 15.90 | 38.08 | 99.76 | 98.44 | 91.82 |
| WGS | YA01 | Pair-end | 250bp | 89.97  | 18.00 | 39.73 | 99.80 | 98.75 | 93.25 |
| WGS | YJ01 | Pair-end | 250bp | 90.60  | 18.12 | 37.19 | 99.76 | 98.39 | 91.53 |
| WGS | YJ02 | Pair-end | 250bp | 97.11  | 19.42 | 37.14 | 99.81 | 98.73 | 93.02 |
| WGS | YX01 | Pair-end | 250bp | 87.25  | 17.44 | 37.85 | 99.81 | 98.81 | 93.40 |
| WGS | YX02 | Pair-end | 250bp | 107.84 | 21.56 | 36.23 | 99.82 | 98.88 | 93.78 |

|         |      |          |       |        |       |       |       |       |       |
|---------|------|----------|-------|--------|-------|-------|-------|-------|-------|
| WGS     | YX03 | Pair-end | 250bp | 101.40 | 20.28 | 37.61 | 99.74 | 98.30 | 91.27 |
| WGS     | YX04 | Pair-end | 250bp | 85.73  | 17.14 | 37.35 | 99.80 | 98.71 | 92.88 |
| WGS     | YX05 | Pair-end | 250bp | 96.78  | 19.36 | 36.97 | 99.79 | 98.60 | 92.39 |
| WGS     | YX06 | Pair-end | 250bp | 70.32  | 14.06 | 37.90 | 99.74 | 98.25 | 91.09 |
| WGS     | YX07 | Pair-end | 250bp | 89.72  | 17.94 | 36.88 | 99.77 | 98.53 | 92.17 |
| WGS     | YX09 | Pair-end | 250bp | 97.56  | 19.52 | 37.57 | 99.76 | 98.44 | 91.81 |
| WGS     | YX10 | Pair-end | 250bp | 93.97  | 18.80 | 36.69 | 99.77 | 98.45 | 91.85 |
| WGS     | YX11 | Pair-end | 250bp | 85.88  | 17.18 | 38.52 | 99.73 | 98.26 | 91.11 |
| WGS     | ZT01 | Pair-end | 250bp | 92.27  | 18.46 | 38.52 | 99.77 | 98.53 | 92.13 |
| RNA-Seq | SF01 | Pair-end | 300bp | 105.68 | 21.14 | 49.72 | 99.77 | 98.90 | 94.44 |
| RNA-Seq | SF02 | Pair-end | 300bp | 97.67  | 19.54 | 49.45 | 99.78 | 98.82 | 93.85 |
| RNA-Seq | SF03 | Pair-end | 300bp | 100.82 | 20.16 | 50.11 | 99.78 | 98.83 | 94.02 |
| RNA-Seq | SF04 | Pair-end | 300bp | 38.05  | 7.62  | 49.78 | 99.81 | 99.05 | 94.82 |
| RNA-Seq | SF05 | Pair-end | 300bp | 99.35  | 19.88 | 49.66 | 99.80 | 98.97 | 94.55 |
| RNA-Seq | SF06 | Pair-end | 300bp | 87.07  | 17.42 | 50.60 | 99.78 | 98.93 | 94.68 |
| RNA-Seq | SF07 | Pair-end | 300bp | 88.80  | 17.76 | 51.31 | 99.77 | 98.81 | 94.12 |
| RNA-Seq | SF08 | Pair-end | 300bp | 131.83 | 26.36 | 50.43 | 99.78 | 98.95 | 94.75 |
| RNA-Seq | SF09 | Pair-end | 300bp | 115.65 | 23.14 | 49.94 | 99.77 | 98.85 | 94.41 |

|         |      |          |       |        |       |       |       |       |       |
|---------|------|----------|-------|--------|-------|-------|-------|-------|-------|
| RNA-Seq | SF10 | Pair-end | 300bp | 115.93 | 23.18 | 51.38 | 99.75 | 98.76 | 94.04 |
| RNA-Seq | SF11 | Pair-end | 300bp | 113.99 | 22.80 | 48.79 | 99.78 | 98.87 | 94.17 |
| RNA-Seq | SF12 | Pair-end | 300bp | 82.44  | 16.48 | 49.19 | 99.80 | 98.99 | 94.74 |
| RNA-Seq | SF13 | Pair-end | 300bp | 99.54  | 19.90 | 52.23 | 99.70 | 98.57 | 93.35 |
| RNA-Seq | SF14 | Pair-end | 300bp | 129.01 | 25.80 | 48.23 | 99.80 | 98.94 | 94.38 |
| RNA-Seq | SF15 | Pair-end | 300bp | 106.16 | 21.24 | 48.55 | 99.80 | 98.97 | 94.60 |
| RNA-Seq | SF16 | Pair-end | 300bp | 100.85 | 20.16 | 49.16 | 99.78 | 98.91 | 94.45 |
| RNA-Seq | SF17 | Pair-end | 300bp | 104.22 | 20.84 | 48.90 | 99.78 | 98.92 | 94.55 |
| RNA-Seq | SF18 | Pair-end | 300bp | 100.14 | 20.02 | 50.07 | 99.77 | 98.88 | 94.48 |
| RNA-Seq | SF25 | Pair-end | 300bp | 99.23  | 19.84 | 50.05 | 99.78 | 98.93 | 94.66 |
| RNA-Seq | SF26 | Pair-end | 300bp | 94.49  | 18.90 | 50.95 | 99.75 | 98.79 | 94.18 |
| RNA-Seq | SF27 | Pair-end | 300bp | 93.05  | 18.62 | 48.92 | 99.79 | 98.93 | 94.47 |
| RNA-Seq | SF31 | Pair-end | 300bp | 100.00 | 20.00 | 50.31 | 99.78 | 98.90 | 94.48 |
| RNA-Seq | SF32 | Pair-end | 300bp | 96.88  | 19.38 | 50.08 | 99.77 | 98.89 | 94.42 |
| RNA-Seq | SF33 | Pair-end | 300bp | 83.92  | 16.78 | 50.53 | 99.77 | 98.85 | 94.29 |
| RNA-Seq | SF37 | Pair-end | 300bp | 113.61 | 22.72 | 48.84 | 99.79 | 98.96 | 94.66 |
| RNA-Seq | SF38 | Pair-end | 300bp | 114.26 | 22.86 | 48.37 | 99.72 | 98.79 | 94.38 |
| RNA-Seq | SF39 | Pair-end | 300bp | 83.03  | 16.60 | 49.37 | 99.80 | 99.01 | 94.90 |



|         |      |          |       |        |       |       |       |       |       |
|---------|------|----------|-------|--------|-------|-------|-------|-------|-------|
| RNA-Seq | SF40 | Pair-end | 300bp | 89.04  | 17.80 | 49.22 | 99.79 | 98.94 | 94.56 |
| RNA-Seq | SF41 | Pair-end | 300bp | 87.70  | 17.54 | 49.09 | 99.80 | 98.98 | 94.72 |
| RNA-Seq | SF42 | Pair-end | 300bp | 100.27 | 20.06 | 48.59 | 99.78 | 98.88 | 94.28 |
| RNA-Seq | SF43 | Pair-end | 300bp | 85.66  | 17.14 | 49.27 | 99.75 | 98.73 | 93.85 |
| RNA-Seq | SF44 | Pair-end | 300bp | 81.45  | 16.30 | 49.35 | 99.80 | 99.06 | 95.10 |
| RNA-Seq | SF45 | Pair-end | 300bp | 71.40  | 14.28 | 49.05 | 99.79 | 98.94 | 94.43 |
| RNA-Seq | SF46 | Pair-end | 300bp | 112.82 | 22.56 | 49.46 | 99.77 | 98.86 | 94.25 |
| RNA-Seq | SF47 | Pair-end | 300bp | 100.54 | 20.10 | 48.72 | 99.79 | 98.91 | 94.38 |
| RNA-Seq | SF48 | Pair-end | 300bp | 96.40  | 19.28 | 48.43 | 99.80 | 98.97 | 94.55 |
| RNA-Seq | SF49 | Pair-end | 300bp | 90.64  | 18.12 | 48.77 | 99.79 | 98.96 | 94.59 |
| RNA-Seq | SF50 | Pair-end | 300bp | 91.42  | 18.28 | 49.59 | 99.75 | 98.74 | 93.87 |
| RNA-Seq | SF51 | Pair-end | 300bp | 95.87  | 19.18 | 49.89 | 99.76 | 98.81 | 94.18 |
| RNA-Seq | SF52 | Pair-end | 300bp | 86.78  | 17.36 | 49.43 | 99.78 | 98.90 | 94.34 |
| RNA-Seq | SF53 | Pair-end | 300bp | 108.57 | 21.72 | 49.42 | 99.77 | 98.79 | 93.72 |
| RNA-Seq | SF54 | Pair-end | 300bp | 63.91  | 12.78 | 49.31 | 99.80 | 99.02 | 94.86 |
| RNA-Seq | SF55 | Pair-end | 300bp | 65.16  | 13.04 | 49.32 | 99.80 | 98.97 | 94.71 |
| RNA-Seq | SF56 | Pair-end | 300bp | 62.07  | 12.42 | 48.68 | 99.80 | 99.02 | 94.92 |
| RNA-Seq | SF57 | Pair-end | 300bp | 59.45  | 11.90 | 49.47 | 99.78 | 98.87 | 94.16 |

|         |      |          |       |        |       |       |       |       |       |
|---------|------|----------|-------|--------|-------|-------|-------|-------|-------|
| RNA-Seq | SF58 | Pair-end | 300bp | 81.90  | 16.38 | 48.82 | 99.80 | 98.96 | 94.43 |
| RNA-Seq | SF59 | Pair-end | 300bp | 83.92  | 16.78 | 48.84 | 99.80 | 99.01 | 94.70 |
| RNA-Seq | SF60 | Pair-end | 300bp | 90.08  | 18.02 | 48.84 | 99.79 | 98.88 | 94.05 |
| RNA-Seq | SF61 | Pair-end | 300bp | 76.30  | 15.26 | 48.93 | 99.79 | 98.93 | 94.41 |
| RNA-Seq | SF62 | Pair-end | 300bp | 78.68  | 15.74 | 48.78 | 99.77 | 98.77 | 93.72 |
| RNA-Seq | SF63 | Pair-end | 300bp | 71.15  | 14.22 | 48.52 | 99.79 | 98.92 | 94.42 |
| RNA-Seq | SF64 | Pair-end | 300bp | 92.93  | 18.58 | 49.33 | 99.80 | 98.98 | 94.75 |
| RNA-Seq | SF65 | Pair-end | 300bp | 52.64  | 10.52 | 49.65 | 99.74 | 98.66 | 93.35 |
| RNA-Seq | SF66 | Pair-end | 300bp | 82.67  | 16.54 | 49.72 | 99.75 | 98.73 | 93.66 |
| RNA-Seq | SF67 | Pair-end | 300bp | 86.74  | 17.34 | 50.04 | 99.76 | 98.77 | 93.75 |
| RNA-Seq | SF68 | Pair-end | 300bp | 95.15  | 19.04 | 49.05 | 99.80 | 98.92 | 94.38 |
| RNA-Seq | SF69 | Pair-end | 300bp | 105.82 | 21.16 | 49.24 | 99.80 | 98.98 | 94.59 |
| RNA-Seq | SF70 | Pair-end | 300bp | 104.70 | 20.94 | 48.88 | 99.78 | 98.82 | 94.02 |
| RNA-Seq | SF71 | Pair-end | 300bp | 91.51  | 18.30 | 49.89 | 99.77 | 98.88 | 94.45 |
| RNA-Seq | SF72 | Pair-end | 300bp | 74.63  | 14.92 | 49.48 | 99.78 | 98.82 | 93.90 |
| RNA-Seq | SF73 | Pair-end | 300bp | 77.38  | 15.48 | 51.52 | 99.79 | 98.96 | 94.57 |
| RNA-Seq | SF74 | Pair-end | 300bp | 63.55  | 12.72 | 50.25 | 99.75 | 98.66 | 93.31 |
| RNA-Seq | SF75 | Pair-end | 300bp | 47.54  | 9.50  | 48.14 | 99.76 | 98.70 | 93.29 |

|         |      |          |       |        |       |       |       |       |       |
|---------|------|----------|-------|--------|-------|-------|-------|-------|-------|
| RNA-Seq | SF76 | Pair-end | 300bp | 104.06 | 20.82 | 48.46 | 99.82 | 99.04 | 94.97 |
| RNA-Seq | SF77 | Pair-end | 300bp | 93.79  | 18.76 | 48.49 | 99.80 | 99.05 | 95.05 |
| RNA-Seq | SF78 | Pair-end | 300bp | 90.56  | 18.12 | 49.32 | 99.76 | 98.75 | 93.65 |
| RNA-Seq | SF82 | Pair-end | 300bp | 90.71  | 18.14 | 50.14 | 99.79 | 98.85 | 93.96 |
| RNA-Seq | SF83 | Pair-end | 300bp | 106.86 | 21.38 | 50.43 | 99.76 | 98.76 | 93.72 |
| RNA-Seq | SF84 | Pair-end | 300bp | 90.70  | 18.14 | 49.20 | 99.80 | 98.94 | 94.38 |
| RNA-Seq | SF85 | Pair-end | 300bp | 96.22  | 19.24 | 49.86 | 99.78 | 98.90 | 94.38 |
| RNA-Seq | SF86 | Pair-end | 300bp | 101.48 | 20.30 | 48.37 | 99.78 | 98.94 | 94.63 |
| RNA-Seq | SF87 | Pair-end | 300bp | 93.65  | 18.74 | 49.89 | 99.79 | 98.95 | 94.61 |

---

**Table S2 | The complete BUSCO gene result of the assembly.**

| <b>Species</b>                 | <b>Complete BUSCO genes</b> | <b>Complete and single-copy BUSCO genes</b> | <b>Complete and duplicated BUSCO genes</b> | <b>Fragmented BUSCO genes</b> | <b>Missing BUSCO genes</b> |
|--------------------------------|-----------------------------|---------------------------------------------|--------------------------------------------|-------------------------------|----------------------------|
| <i>Drosophila melanogaster</i> | 99.70%                      | 99.00%                                      | 0.70%                                      | 0.20%                         | 0.10%                      |
| <i>Plutella xylostella</i>     | 87.90%                      | 72.60%                                      | 15.30%                                     | 2.60%                         | 9.50%                      |
| <i>Manduca sexta</i>           | 96.70%                      | 94.00%                                      | 2.70%                                      | 1.70%                         | 1.60%                      |
| <i>Bombyx mori</i>             | 95.60%                      | 95.10%                                      | 0.50%                                      | 2.20%                         | 2.20%                      |
| <i>Danaus plexippus</i>        | 98.00%                      | 95.90%                                      | 2.10%                                      | 1.00%                         | 1.00%                      |
| <i>Helicoverpa armigera</i>    | 96.70%                      | 95.60%                                      | 1.10%                                      | 1.40%                         | 1.90%                      |
| <i>Spodoptera litura</i>       | 97.20%                      | 95.80%                                      | 1.40%                                      | 1.00%                         | 1.80%                      |
| <b>SFynMstLFR</b>              | 95.00%                      | 85.20%                                      | 9.80%                                      | 2.80%                         | 2.20%                      |
| <b>PRJNA380964</b>             | 91.10%                      | 74.00%                                      | 17.10%                                     | 2.70%                         | 6.20%                      |
| <b>PRJNA257248</b>             | 84.50%                      | 83.40%                                      | 1.10%                                      | 6.60%                         | 8.90%                      |
| <b>PRJEB13110</b>              | 88.20%                      | 76.70%                                      | 11.50%                                     | 7.70%                         | 4.10%                      |
| <b>PRJNA344686</b>             | 86.00%                      | 81.00%                                      | 5.00%                                      | 10.50%                        | 3.50%                      |

Note: The lineage dataset is: insecta\_odb9 (Creation date: 2016-10-21, number of species: 42, number of BUSCOs: 1658). SFynMstLFR, PRJNA380964, PRJNA257248, PRJEB13110, PRJNA344686 were different versions of the genome of *Spodoptera frugiperda*, the detailed information may find in the NCBI according to the provided number.

**Table S3 | Mapping reads against the assembled genome using raw reads generated by different libraries.**

| <b>Type</b>               | <b>HIC</b> | <b>stLFR</b> | <b>RNA-seq</b> | <b>WGS</b> |
|---------------------------|------------|--------------|----------------|------------|
| <b>Total Mapped Reads</b> | 93.58%     | 95.60%       | 98.98%         | 90.71%     |
| <b>Genome Coverage</b>    | 97.70%     | 99.90%       | --             | 90.80%     |

**Table S4 The sequencing depth, mapping rate and coverage of the 163 resequencing samples.**

| <b>Samples</b> | <b>Depth (×)</b> | <b>Mapping rate</b> | <b>Coverage</b> |
|----------------|------------------|---------------------|-----------------|
| KE-1           | 41.12            | 97.49%              | 98.90%          |
| KE-10          | 28.07            | 97.08%              | 98.90%          |
| KE-3           | 25.58            | 97.02%              | 98.90%          |
| KE-5           | 32.71            | 97.13%              | 98.80%          |
| KE-4           | 31.69            | 97.44%              | 98.70%          |
| KE-8           | 28.68            | 96.69%              | 98.70%          |
| KE-9           | 36.25            | 97.35%              | 98.70%          |
| KE-7           | 31.11            | 97.26%              | 98.00%          |
| KE-6           | 31.11            | 97.82%              | 97.60%          |
| NA4            | 31.1             | 96.96%              | 93.10%          |
| SC26           | 43.91            | 97.25%              | 93.00%          |
| NA14           | 48.18            | 97.84%              | 92.60%          |
| SC18           | 41.4             | 97.34%              | 92.60%          |
| SC10           | 44.41            | 97.54%              | 92.50%          |
| NA15           | 49.91            | 97.75%              | 92.40%          |
| SC24           | 52.04            | 97.67%              | 92.20%          |
| SC32           | 46.2             | 98.05%              | 92.20%          |
| SC17           | 45.81            | 97.85%              | 92.10%          |
| SC21           | 46.46            | 97.86%              | 92.00%          |
| SC15           | 28.01            | 96.61%              | 91.90%          |
| SC49           | 44.91            | 97.79%              | 91.80%          |
| GX03           | 44.24            | 97.60%              | 91.70%          |
| SC44           | 28.53            | 97.06%              | 91.70%          |
| SC28           | 48.9             | 97.60%              | 91.60%          |
| SC34           | 49.9             | 97.45%              | 91.60%          |
| ML3            | 47.25            | 97.91%              | 91.50%          |
| SC30           | 48.1             | 97.45%              | 91.50%          |

|      |       |        |        |
|------|-------|--------|--------|
| SC36 | 84.93 | 97.31% | 91.40% |
| SC46 | 85.34 | 97.16% | 91.40% |
| SC47 | 45.31 | 97.56% | 91.40% |
| NA1  | 48.68 | 97.46% | 91.30% |
| SC11 | 80.18 | 97.26% | 91.30% |
| SC29 | 79.87 | 97.55% | 91.30% |
| ML5  | 89.49 | 97.06% | 91.20% |
| NA12 | 84.14 | 97.25% | 91.20% |
| SC03 | 83.32 | 97.28% | 91.20% |
| SC23 | 46.88 | 97.40% | 91.20% |
| SC35 | 75.12 | 97.07% | 91.10% |
| ML2  | 53.3  | 97.47% | 91.00% |
| ML4  | 83.32 | 97.20% | 91.00% |
| SC14 | 24.81 | 97.88% | 90.80% |
| SC31 | 36.8  | 97.05% | 90.80% |
| SC50 | 39.62 | 96.89% | 90.80% |
| D4   | 45.37 | 97.24% | 90.70% |
| ML1  | 36    | 97.80% | 90.70% |
| SC16 | 29.06 | 97.40% | 90.70% |
| SC19 | 26.45 | 85.48% | 90.70% |
| SC33 | 25.74 | 96.39% | 90.70% |
| SC38 | 32.36 | 88.44% | 90.70% |
| SC13 | 45.68 | 87.18% | 90.60% |
| SC08 | 43.6  | 88.20% | 90.50% |
| SC12 | 31.14 | 96.98% | 90.50% |
| SC27 | 53.9  | 94.69% | 90.50% |
| SC48 | 48.34 | 95.75% | 90.50% |
| MS03 | 28.44 | 96.38% | 90.40% |
| NJ07 | 47.16 | 93.03% | 90.40% |
| SC45 | 46.92 | 97.19% | 90.40% |
| SC60 | 44.75 | 81.42% | 90.40% |

|        |       |        |        |
|--------|-------|--------|--------|
| YX05   | 31.73 | 97.92% | 90.40% |
| C9     | 30.21 | 96.45% | 90.30% |
| D6     | 36.31 | 96.58% | 90.30% |
| GX01   | 29.53 | 98.06% | 90.30% |
| GX02   | 27.14 | 89.84% | 90.30% |
| SC55   | 50.65 | 96.63% | 90.30% |
| YX02   | 24.31 | 97.23% | 90.30% |
| D1     | 25.63 | 88.98% | 90.20% |
| LL05   | 28.89 | 95.70% | 90.20% |
| LL06   | 28.32 | 87.71% | 90.20% |
| LL09   | 34.45 | 91.86% | 90.20% |
| MS04   | 28.43 | 96.81% | 90.20% |
| SC53   | 45.36 | 96.91% | 90.20% |
| YJ02   | 28.12 | 95.79% | 90.20% |
| YX03   | 45.22 | 90.95% | 90.20% |
| YX10   | 53.24 | 96.65% | 90.20% |
| BS02   | 82.05 | 96.67% | 90.10% |
| FJ01_3 | 30.46 | 97.23% | 90.10% |
| JC01   | 48.34 | 97.46% | 90.10% |
| LL01_3 | 50.03 | 94.10% | 90.10% |
| ML01_3 | 32.31 | 96.24% | 90.10% |
| MZ01   | 32.71 | 95.92% | 90.10% |
| NJ05   | 68.18 | 94.91% | 90.10% |
| SC39   | 88.52 | 94.63% | 90.10% |
| SC51   | 30.14 | 97.31% | 90.10% |
| ZT01   | 26.52 | 97.77% | 90.10% |
| C7     | 22.02 | 95.12% | 90.00% |
| GX04   | 89.9  | 96.37% | 90.00% |
| NJ06   | 36.73 | 95.86% | 90.00% |
| NJ08   | 43.41 | 86.75% | 90.00% |
| YA01   | 30.31 | 96.57% | 90.00% |



|        |        |        |        |
|--------|--------|--------|--------|
| YX01   | 25.22  | 96.78% | 90.00% |
| YX09   | 29.14  | 96.12% | 90.00% |
| D10    | 32.03  | 96.71% | 89.90% |
| MH01   | 33.18  | 97.88% | 89.90% |
| MH03   | 43.26  | 97.29% | 89.90% |
| NJ01   | 31.46  | 97.82% | 89.90% |
| SC20   | 30.91  | 96.10% | 89.90% |
| SC37   | 45.29  | 96.37% | 89.90% |
| SC40   | 79.46  | 95.10% | 89.90% |
| SC41   | 32.79  | 95.77% | 89.90% |
| YX06   | 58.91  | 95.42% | 89.90% |
| BS01   | 69.78  | 97.39% | 89.80% |
| FAW5.2 | 40.95  | 96.50% | 89.80% |
| ML01_1 | 43.79  | 97.21% | 89.80% |
| SC25   | 43.42  | 85.76% | 89.80% |
| SC42   | 111.9  | 95.04% | 89.80% |
| YX04   | 29.78  | 96.04% | 89.80% |
| YX07   | 77.87  | 88.03% | 89.80% |
| FJ01_1 | 43.14  | 91.95% | 89.70% |
| FJ01_2 | 64.85  | 78.93% | 89.70% |
| LL04   | 30.98  | 95.48% | 89.70% |
| NJ02   | 51.9   | 96.93% | 89.70% |
| NJ03   | 77.15  | 97.22% | 89.70% |
| XS01   | 78.76  | 93.02% | 89.70% |
| YJ01   | 46.77  | 89.62% | 89.70% |
| YX11   | 65.65  | 97.35% | 89.70% |
| D3     | 55.29  | 95.19% | 89.60% |
| A10    | 81.72  | 88.21% | 89.50% |
| ML01   | 135.13 | 91.56% | 89.50% |
| NJ04   | 79.35  | 97.41% | 89.50% |
| C3     | 49.17  | 97.18% | 89.40% |

|        |       |        |        |
|--------|-------|--------|--------|
| LJ01   | 32.47 | 96.25% | 89.40% |
| LL01_2 | 48.21 | 95.53% | 89.40% |
| SC43   | 29.23 | 90.18% | 89.40% |
| SC52   | 30.45 | 95.39% | 89.40% |
| A5     | 80.85 | 97.27% | 89.30% |
| C4     | 49.3  | 96.88% | 89.30% |
| D2     | 83.61 | 97.35% | 89.30% |
| SC59   | 45.86 | 95.91% | 89.30% |
| C1     | 32.73 | 97.13% | 89.10% |
| C2     | 33.95 | 97.34% | 89.10% |
| D9     | 30.93 | 96.76% | 89.00% |
| SC54   | 43.16 | 88.59% | 89.00% |
| SC56   | 75.11 | 97.76% | 89.00% |
| A3     | 46.77 | 94.42% | 88.90% |
| A4     | 34.55 | 95.79% | 88.90% |
| A9     | 90.89 | 96.23% | 88.90% |
| D8     | 84.1  | 96.51% | 88.90% |
| SC57   | 46.57 | 97.43% | 88.90% |
| A1     | 66.51 | 97.31% | 88.80% |
| A7     | 47.63 | 97.69% | 88.80% |
| A8     | 48.68 | 97.55% | 88.80% |
| C8     | 47.04 | 91.89% | 88.80% |
| D7     | 97.24 | 97.66% | 88.80% |
| D5     | 48.64 | 97.92% | 88.70% |
| A6     | 44.28 | 97.28% | 88.60% |
| C6     | 88.72 | 98.08% | 88.60% |
| FAW1.2 | 86.42 | 97.84% | 88.50% |
| SC58   | 83.69 | 98.23% | 88.50% |
| A2     | 26.42 | 95.84% | 88.30% |
| FAW1.1 | 26.84 | 86.15% | 88.20% |
| B8     | 29.93 | 95.65% | 87.90% |

|        |       |        |        |
|--------|-------|--------|--------|
| B5     | 29.72 | 98.01% | 87.50% |
| C10    | 25.92 | 92.30% | 87.50% |
| B1     | 30.38 | 97.54% | 87.10% |
| B3     | 34.2  | 96.89% | 87.00% |
| B4     | 28.14 | 95.04% | 87.00% |
| B6     | 32.44 | 96.77% | 86.90% |
| B2     | 23.63 | 96.39% | 86.80% |
| B7     | 33    | 97.41% | 86.80% |
| B9     | 31.46 | 95.83% | 86.80% |
| B10    | 36.34 | 96.03% | 86.70% |
| FAW2.2 | 28.45 | 95.24% | 86.10% |
| FAW2.1 | 31.21 | 97.54% | 85.30% |

---

**Table S5 | K-mer based genome survey results calculated by the GCE software.**

| <b>Samples</b> | <b>genome size(Mb)</b> | <b>heterozygous ratio</b> | <b>repeat ratio</b> |
|----------------|------------------------|---------------------------|---------------------|
| SC24           | 977.561341             | 0.003828871               | 0.243287            |
| SC21           | 874.340065             | 0.004748888               | 0.246687            |
| SC28           | 846.217305             | 0.002750735               | 0.659175            |
| SC26           | 836.619120             | 0.002073576               | 0.521523            |
| SC17           | 797.069980             | 0.002009882               | 0.533027            |
| SC49           | 796.109551             | 0.002898735               | 0.659732            |
| SC15           | 793.086128             | 0.001838276               | 0.561400            |
| SC44           | 784.693709             | 0.001839076               | 0.543139            |
| D1             | 779.720054             | 0.000952971               | 0.562769            |
| SC11           | 779.226146             | 0.001281806               | 0.552523            |
| SC36           | 775.109434             | 0.001384018               | 0.542359            |
| SC34           | 774.324944             | 0.003349682               | 0.552095            |
| D6             | 774.068006             | 0.000961647               | 0.558824            |
| NA14           | 772.211736             | 0.001705200               | 0.564824            |
| SC47           | 771.849088             | 0.000575254               | 0.545093            |
| SC29           | 768.187461             | 0.001068071               | 0.560577            |
| ML3            | 766.376712             | 0.001452841               | 0.550400            |
| SC30           | 765.870748             | 0.000987882               | 0.536488            |
| SC32           | 764.921516             | 0.001857224               | 0.645969            |
| NA4            | 753.837788             | 0.003337235               | 0.329505            |
| SC60           | 745.146173             | 0.004698047               | 0.574464            |
| NA1            | 702.703204             | 0.004992947               | 0.287906            |
| SC59           | 644.193421             | 0.002737171               | 0.683969            |
| SC53           | 545.005925             | 0.004319629               | 0.532412            |
| SC55           | 536.940269             | 0.003117041               | 0.569925            |
| D10            | 515.866395             | 0.001622976               | 0.315265            |
| D8             | 515.189284             | 0.017778529               | 0.315084            |
| C9             | 513.616427             | 0.001496035               | 0.304131            |
| SC51           | 512.814357             | 0.001674947               | 0.334524            |
| C7             | 512.661931             | 0.001642076               | 0.322977            |
| D3             | 511.411040             | 0.018642588               | 0.548606            |
| D2             | 510.283645             | 0.000390887               | 0.540588            |

Note: 32 individuals with the sequencing depth larger than 60× were selected for this genome survey analysis.

**Table S6 | Genome coverage evaluated by expressed sequence tags (EST) and transcriptome datasets.**

| Dataset        | Number                   | Total length (bp) | Base covered by assembly(%) | Sequences covered by assembly(%) | with >90% sequence in one scaffold |            | with >50% sequence in one scaffold |            |       |
|----------------|--------------------------|-------------------|-----------------------------|----------------------------------|------------------------------------|------------|------------------------------------|------------|-------|
|                |                          |                   |                             |                                  | Number                             | Percent(%) | Number                             | Percent(%) |       |
| Sf_cDNA        |                          |                   |                             |                                  |                                    |            |                                    |            |       |
|                | >0bp                     | 48,901            | 29,207,093                  | 94.82                            | 98.82                              | 37,980     | 77.67                              | 47,874     | 97.90 |
|                | >200bp                   | 48,215            | 29,097,650                  | 94.85                            | 98.85                              | 37,695     | 78.18                              | 47,212     | 97.92 |
|                | >500bp                   | 35,561            | 24,232,582                  | 95.35                            | 98.89                              | 30,557     | 85.93                              | 34,761     | 97.75 |
| <b>EST</b>     | sf21_raw_trinity_cdhit90 |                   |                             |                                  |                                    |            |                                    |            |       |
|                | >0bp                     | 20,691            | 22,620,514                  | 94.15                            | 96.86                              | 17,656     | 85.33                              | 19,250     | 93.04 |
|                | >200bp                   | 20,691            | 22,620,514                  | 94.15                            | 96.86                              | 17,656     | 85.33                              | 19,250     | 93.04 |
|                | >500bp                   | 11,695            | 19,681,612                  | 94.57                            | 97.93                              | 10,211     | 87.31                              | 10,975     | 93.84 |
|                | >1000bp                  | 7,208             | 16,487,451                  | 95.13                            | 98.68                              | 6,420      | 89.07                              | 6,845      | 94.96 |
| <b>RNA-seq</b> | SFgdRNA_1                |                   |                             |                                  |                                    |            |                                    |            |       |
|                | >0bp                     | 51,298            | 46,277,886                  | 87.30                            | 93.34                              | 36,718     | 71.58                              | 43,498     | 84.79 |

|           |        |            |       |       |        |       |        |       |
|-----------|--------|------------|-------|-------|--------|-------|--------|-------|
| >200bp    | 51,298 | 46,277,886 | 87.30 | 93.34 | 36,718 | 71.58 | 43,498 | 84.79 |
| >500bp    | 26,701 | 38,482,330 | 88.28 | 96.97 | 19,300 | 72.28 | 23,269 | 87.15 |
| >1000bp   | 14,006 | 29,521,540 | 89.29 | 98.80 | 10,239 | 73.10 | 12,580 | 89.82 |
| SFgdRNA_2 |        |            |       |       |        |       |        |       |
| >0bp      | 53,603 | 61,239,312 | 85.14 | 92.45 | 34,867 | 65.05 | 43,135 | 80.47 |
| >200bp    | 53,603 | 61,239,312 | 85.14 | 92.45 | 34,867 | 65.05 | 43,135 | 80.47 |
| >500bp    | 31,233 | 54,166,519 | 86.11 | 96.62 | 20,646 | 66.10 | 25,986 | 83.20 |
| >1000bp   | 19,067 | 45,562,462 | 87.33 | 98.33 | 13,041 | 68.40 | 16,468 | 86.37 |

---

**Table S7 | The result of gene prediction for the *de novo* prediction with Augustus, glimmerHMM and SNAP, and homology based on *Bombyx mori*, *Danaus plexippus*, *Drosophila melanogaster* and *Spodoptera litura* genomes.**

|                       | GeneSet                        | Total number of gene | Average of mRNA_length | Average of cds_length | Average of exon_number | Average of exon_length | Average of intron_numebr | Average of intron_length |
|-----------------------|--------------------------------|----------------------|------------------------|-----------------------|------------------------|------------------------|--------------------------|--------------------------|
| <b><i>De novo</i></b> | augustus                       | 18,689               | 7399.29                | 1357.20               | 6.27                   | 216.59                 | 5.27                     | 1147.32                  |
|                       | glimmerHMM                     | 55,551               | 8016.99                | 815.92                | 4.46                   | 182.77                 | 3.36                     | 2078.67                  |
|                       | snap                           | 35,165               | 23222.51               | 1216.98               | 7.75                   | 156.97                 | 6.75                     | 3258.74                  |
| <b>Homolog</b>        | <i>Bombyx mori</i>             | 27,441               | 2993.05                | 865.16                | 3.50                   | 247.44                 | 2.50                     | 852.37                   |
|                       | <i>Danaus plexippus</i>        | 22,037               | 4550.76                | 1067.59               | 4.21                   | 253.80                 | 3.21                     | 1086.33                  |
|                       | <i>Drosophila melanogaster</i> | 11,700               | 4487.43                | 952.76                | 4.13                   | 230.42                 | 3.13                     | 1127.53                  |
|                       | <i>Spodoptera litura</i>       | 23,580               | 5806.58                | 1337.13               | 4.90                   | 272.83                 | 3.9                      | 1145.74                  |
| <b>RNA-seq</b>        | stringtie                      | 30,470               | 3746.13                | 509.73                | 2.84                   | 179.57                 | 1.84                     | 1758.23                  |
| <b>Glean</b>          |                                | 21,377               | 5029.31                | 1363.54               | 5.49                   | 248.17                 | 4.49                     | 815.64                   |
| <b>Check</b>          |                                | 22,201               | 5309.11                | 1346.57               | 5.46                   | 246.61                 | 4.46                     | 888.39                   |

**Table S8 | Statistics on functional annotation of the fall armyworm predicted genes.**

|                  | <b>Number</b> | <b>Percentage</b> |
|------------------|---------------|-------------------|
| <b>Total</b>     | 22,201        | 100.00%           |
| <b>Swissprot</b> | 14,724        | 66.32%            |
| <b>KEGG</b>      | 16,072        | 72.39%            |
| <b>COG</b>       | 6,365         | 28.67%            |
| <b>TrEMBL</b>    | 20,678        | 93.14%            |
| <b>Interpro</b>  | 14,799        | 66.66%            |
| <b>Overall</b>   | 20,754        | 93.48%            |



**Table S9 | Assessment of gene set in BUSCO evaluation.**

| <b>Species</b>                 | <b>Complete BUSCOs</b> | <b>Complete and single-copy BUSCOs</b> | <b>Complete and duplicated BUSCOs</b> | <b>Fragmented BUSCOs</b> | <b>Missing BUSCOs</b> |
|--------------------------------|------------------------|----------------------------------------|---------------------------------------|--------------------------|-----------------------|
| <i>Drosophila melanogaster</i> | 97.90%                 | 97.10%                                 | 0.80%                                 | 0.20%                    | 1.90%                 |
| <i>Plutella xylostella</i>     | 74.90%                 | 62.80%                                 | 12.10%                                | 5.60%                    | 19.50%                |
| <i>Manduca sexta</i>           | 93.40%                 | 90.30%                                 | 3.10%                                 | 3.30%                    | 3.30%                 |
| <i>Bombyx mori</i>             | 89.90%                 | 89.40%                                 | 0.50%                                 | 6.70%                    | 3.40%                 |
| <i>Danaus plexippus</i>        | 97.00%                 | 95.40%                                 | 1.60%                                 | 3.00%                    | 0.00%                 |
| <i>Helicoverpa armigera</i>    | 95.30%                 | 94.50%                                 | 0.80%                                 | 2.60%                    | 2.10%                 |
| <i>Spodoptera litura</i>       | 98.70%                 | 97.30%                                 | 1.40%                                 | 0.70%                    | 0.60%                 |
| <i>Spodoptera frugiperda</i>   | 94.20%                 | 84.10%                                 | 10.10%                                | 3.90%                    | 1.90%                 |

Note: The lineage dataset is: insecta\_odb9 (Creation date: 2016-10-21, number of species: 42, number of BUSCOs: 1658).

**Table S10 | Enriched IPR items in PSGs.**

| <b>IPR_ID</b>    | <b>IPR_Title</b>                     | <b>Q-value</b> | <b>Number of DEGs</b> | <b>Number of all genes</b> |
|------------------|--------------------------------------|----------------|-----------------------|----------------------------|
| <b>IPR000477</b> | Reverse transcriptase domain         | 7.68E-78       | 57                    | 664                        |
| <b>IPR005135</b> | Endonuclease/exonuclease/phosphatase | 6.57E-23       | 32                    | 261                        |
| <b>IPR001878</b> | Zinc finger, CCHC-type               | 2.90E-07       | 19                    | 339                        |
| <b>IPR003094</b> | Fructose-2,6-bisphosphatase          | 0.013608245    | 2                     | 3                          |
| <b>IPR006900</b> | Sec23/Sec24, helical domain          | 0.018527094    | 2                     | 4                          |
| <b>IPR000330</b> | SNF2-related                         | 0.018527094    | 3                     | 17                         |

Table S11 | Gene numbers of 11 gene families that scanned by HMMER3.

|                                | <i>ABC</i> | <i>CES</i> | <i>CYP</i> | <i>GST</i> | <i>UGT</i> | <i>AOX</i> | <i>CHIA</i> | <i>EPIA</i> | <i>PIF</i> | <i>PTCHD</i> | <i>PTP</i> |
|--------------------------------|------------|------------|------------|------------|------------|------------|-------------|-------------|------------|--------------|------------|
| <i>Bombyx mori</i>             | 60         | 135        | 126        | 25         | 50         | 15         | 18          | 8           | 24         | 5            | 22         |
| <i>Danaus plexippus</i>        | 92         | 72         | 125        | 52         | 57         | 6          | 35          | 4           | 2          | 15           | 40         |
| <i>Drosophila melanogaster</i> | 50         | 49         | 81         | 20         | 39         | 11         | 15          | 9           | 0          | 8            | 16         |
| <i>Helicoverpa armigera</i>    | 54         | 97         | 114        | 29         | 46         | 15         | 13          | 9           | 10         | 6            | 14         |
| <i>Manduca sexta</i>           | 78         | 120        | 143        | 29         | 53         | 30         | 21          | 17          | 0          | 14           | 34         |
| <i>Plutella xylostella</i>     | 127        | 79         | 103        | 24         | 34         | 10         | 21          | 11          | 0          | 5            | 18         |
| <i>Spodoptera frugiperda</i>   | 76         | 78         | 425        | 48         | 36         | 18         | 13          | 9           | 79         | 5            | 14         |
| <i>Spodoptera litura</i>       | 132        | 141        | 143        | 44         | 65         | 22         | 21          | 8           | 27         | 11           | 19         |

**Table S12 | 283 CYP genes that specific to *Spodoptera frugiperda*.**

| <b>Gene ID</b> | <b>Gene ID</b> | <b>Gene ID</b> | <b>Gene ID</b> | <b>Gene ID</b> | <b>Gene ID</b> | <b>Gene ID</b> | <b>Gene ID</b> |
|----------------|----------------|----------------|----------------|----------------|----------------|----------------|----------------|
| SFR00072       | SFR03105       | SFR01325       | SFR16205       | SFR04688       | SFR18386       | SFR18073       | SFR22042       |
| SFR00134       | SFR08744       | SFR10442       | SFR16224       | SFR04726       | SFR20588       | SFR02695       | SFR16252       |
| SFR00173       | SFR08805       | SFR10481       | SFR18719       | SFR20048       | SFR04407       | SFR19331       | SFR16387       |
| SFR00174       | SFR16009       | SFR14393       | SFR08256       | SFR20050       | SFR06725       | SFR03333       | SFR04898       |
| SFR00186       | SFR16974       | SFR17174       | SFR08867       | SFR03269       | SFR21631       | SFR14560       | SFR03758       |
| SFR00266       | SFR17241       | SFR17175       | SFR08871       | SFR03276       | SFR09600       | SFR21029       | SFR04567       |
| SFR00281       | SFR06006       | SFR00810       | SFR12773       | SFR10100       | SFR17977       | SFR04284       | SFR20982       |
| SFR00288       | SFR06025       | SFR00813       | SFR15530       | SFR11981       | SFR02738       | SFR20767       | SFR02099       |
| SFR01118       | SFR07672       | SFR01087       | SFR18871       | SFR08049       | SFR02921       | SFR22060       | SFR21522       |
| SFR07389       | SFR09009       | SFR01210       | SFR19006       | SFR13801       | SFR08653       | SFR17827       | SFR03240       |
| SFR07457       | SFR09020       | SFR04044       | SFR19028       | SFR13871       | SFR09637       | SFR03601       | SFR03612       |
| SFR07489       | SFR09024       | SFR04675       | SFR00463       | SFR03565       | SFR10785       | SFR14572       | SFR00829       |
| SFR07532       | SFR18465       | SFR04680       | SFR00467       | SFR04272       | SFR10797       | SFR16437       | SFR04421       |
| SFR07540       | SFR00792       | SFR10856       | SFR00644       | SFR04275       | SFR01135       | SFR20032       | SFR06165       |
| SFR07553       | SFR05788       | SFR10866       | SFR00649       | SFR05833       | SFR02766       | SFR02961       | SFR19913       |
| SFR13308       | SFR09757       | SFR11683       | SFR17306       | SFR10876       | SFR16281       | SFR21423       | SFR04422       |
| SFR20161       | SFR09766       | SFR17967       | SFR02181       | SFR12751       | SFR16562       | SFR08308       | SFR06448       |
| SFR01253       | SFR18593       | SFR10651       | SFR03389       | SFR12914       | SFR16563       | SFR19891       | SFR06550       |
| SFR03301       | SFR18594       | SFR15059       | SFR08097       | SFR14512       | SFR20095       | SFR04494       | SFR16689       |
| SFR05156       | SFR08451       | SFR15076       | SFR08143       | SFR01418       | SFR05480       | SFR05610       | SFR17524       |
| SFR07814       | SFR10425       | SFR16054       | SFR09240       | SFR01420       | SFR20025       | SFR19417       | SFR18102       |
| SFR07820       | SFR13922       | SFR18278       | SFR09413       | SFR01421       | SFR03495       | SFR14585       | SFR17393       |
| SFR12059       | SFR16254       | SFR08600       | SFR09535       | SFR05113       | SFR11492       | SFR16881       | SFR18037       |
| SFR12515       | SFR20311       | SFR09485       | SFR10619       | SFR05115       | SFR18929       | SFR18260       | SFR19768       |
| SFR15604       | SFR03783       | SFR09487       | SFR13116       | SFR06329       | SFR02956       | SFR06504       | SFR04086       |
| SFR02344       | SFR06619       | SFR09489       | SFR05368       | SFR06386       | SFR03061       | SFR18943       | SFR02717       |
| SFR03438       | SFR13490       | SFR09498       | SFR14715       | SFR08165       | SFR03232       | SFR13442       | SFR08668       |
| SFR03458       | SFR17574       | SFR09552       | SFR16832       | SFR09045       | SFR21388       | SFR13443       | SFR07780       |
| SFR07273       | SFR17683       | SFR09554       | SFR01469       | SFR10215       | SFR22093       | SFR08400       | SFR01357       |
| SFR08202       | SFR17690       | SFR09567       | SFR11696       | SFR10226       | SFR03425       | SFR12652       | SFR04341       |
| SFR08203       | SFR02678       | SFR18294       | SFR17118       | SFR12077       | SFR21123       | SFR14625       | SFR04411       |
| SFR10245       | SFR06359       | SFR04141       | SFR11307       | SFR12081       | SFR15143       | SFR19895       |                |
| SFR13063       | SFR12604       | SFR05273       | SFR11359       | SFR21441       | SFR01835       | SFR11913       |                |
| SFR15489       | SFR12646       | SFR07206       | SFR11417       | SFR03472       | SFR02389       | SFR08357       |                |
| SFR19490       | SFR18255       | SFR16200       | SFR02847       | SFR12134       | SFR16850       | SFR02912       |                |
| SFR02516       | SFR19143       | SFR16204       | SFR04687       | SFR15455       | SFR11867       | SFR04214       |                |

**Table S13 | The statistic of the global nucleotide diversity ( $\pi$ ) in nine population.**

| <b>Group</b>        | <b><math>\pi</math></b> |
|---------------------|-------------------------|
| <b>America_A</b>    | 0.0025923               |
| <b>America_B</b>    | 0.0010229               |
| <b>America_C</b>    | 0.0019534               |
| <b>America_D</b>    | 0.0017428               |
| <b>Ethiopia</b>     | 0.0023010               |
| <b>Kenya</b>        | 0.0035087               |
| <b>Guangxi</b>      | 0.0022234               |
| <b>South_Africa</b> | 0.0017768               |
| <b>Yunnan</b>       | 0.0021849               |

**Table S14 | The  $F_{ST}$  estimate within nine population.**

| $F_{ST}$     | America B | America C | America D | Ethiopia | Kenya  | Guangxi | South Africa | Yunnan |
|--------------|-----------|-----------|-----------|----------|--------|---------|--------------|--------|
| America A    | 0.33795   | 0.17256   | 0.23152   | 0.1071   | 0.1483 | 0.1313  | 0.1286       | 0.1321 |
| America B    |           | 0.4064    | 0.50295   | 0.3737   | 0.3931 | 0.3189  | 0.4779       | 0.3264 |
| America C    |           |           | 0.1409    | 0.2036   | 0.2368 | 0.2004  | 0.256        | 0.2056 |
| America D    |           |           |           | 0.2671   | 0.2925 | 0.2506  | 0.3358       | 0.2561 |
| Ethiopia     |           |           |           |          | 0.0383 | 0.0111  | 0.0544       | 0.0106 |
| Kenya        |           |           |           |          |        | 0.0274  | 0.1122       | 0.0234 |
| Guangxi      |           |           |           |          |        |         | 0.0525       | 0.0079 |
| South Africa |           |           |           |          |        |         |              | 0.0524 |

Note: ■ 0-0.05 ■ 0.05-0.15 ■ 0.15-0.25 ■ >0.25

**Table S15 | The statistics of selective sweep signal and harbor gene number.**

|                     | <b>Selective sweep signal</b> | <b>harbor gene</b> |
|---------------------|-------------------------------|--------------------|
| <b>Ethiopia</b>     | 4450                          | 233                |
| <b>Kenya</b>        | 4526                          | 293                |
| <b>South Africa</b> | 4221                          | 186                |
| <b>Guangxi</b>      | 4391                          | 246                |
| <b>Yunnan</b>       | 4327                          | 339                |
| <b>America A</b>    | 4501                          | 288                |
| <b>America B</b>    | 3921                          | 110                |
| <b>America C</b>    | 4383                          | 322                |
| <b>America D</b>    | 4288                          | 196                |

**Table S16 | The 23 pesticide treatments and one control (Biological sample duplication: 3).**

| <b>Pesticide code</b> | <b>Pesticide Types</b> | <b>Pesticides treatment</b>                                        | <b>Treated concentration</b> | <b>Differentially expressed genes</b> | <b>Down regulated</b> | <b>Up regulated</b> | <b>Targets</b>                  |
|-----------------------|------------------------|--------------------------------------------------------------------|------------------------------|---------------------------------------|-----------------------|---------------------|---------------------------------|
| <b>P1</b>             | biological             | 80 Billion spores/ml Metarhizium anisopliae suspension concentrate | 60ul/L                       | 1184                                  | 447                   | 737                 | Nervous System                  |
| <b>P2</b>             | biological             | 100 Billion spores/g Bacillus thuringiensis suspension concentrate | 27ul/L                       | 2055                                  | 824                   | 1231                | Digestive System*Nervous System |
| <b>P3</b>             | biological             | 100 Billion spores/ml Empedobacter brevis suspension concentrate   | 50ul/L                       | 752                                   | 345                   | 407                 | Digestive System                |
| <b>P4</b>             | biological             | 0.3% Azadirachtin emulsifiable concentrate                         | 20ul/L                       | 1657                                  | 579                   | 1078                | Digestive System                |
| <b>P5</b>             | Single Chemical        | 3% Emamectin Benzoate microemulsion                                | 8ul/L                        | 1905                                  | 969                   | 936                 | Nervous System                  |
| <b>P6</b>             | Single Chemical        | 15% Indoxacarb suspension concentrate                              | 28ul/L                       | 1450                                  | 757                   | 693                 | Nervous System                  |
| <b>P7</b>             | Single Chemical        | 19% Spinetoram water dispersible granule                           | 2.2ul/L                      | 2341                                  | 968                   | 1373                | Nervous System                  |
| <b>P8</b>             | Single Chemical        | 10% Chlorfenapyr suspension concentrate                            | 40ul/L                       | 2458                                  | 1023                  | 1435                | Energy Metabolism               |
| <b>P9</b>             | Single Chemical        | 10% Ethofenprox suspension concentrate                             | 80ul/L                       | 1805                                  | 800                   | 1005                | Nervous System                  |
| <b>P10</b>            | Single Chemical        | 20% Dinotefuran soluble granules                                   | 3.2mg/L                      | 2133                                  | 853                   | 1280                | Nervous System                  |



|            |                     |                                                                |         |      |     |      |                                       |
|------------|---------------------|----------------------------------------------------------------|---------|------|-----|------|---------------------------------------|
| <b>P11</b> | Mixture of Chemical | 25% Cyhalodiamide*Clothianidin suspension concentrate          | 50ul/L  | 1807 | 738 | 1069 | Nervous System                        |
| <b>P12</b> | Mixture of Chemical | 8% Avermectin*Indoxacarb water dispersible granule             | 3.6mg/L | 875  | 476 | 399  | Nervous System                        |
| <b>P13</b> | Mixture of Chemical | 30% Hexaflumuron*Indoxacarb suspension concentrate             | 25ul/L  | 278  | 168 | 110  | Inhibit insect peeling*Nervous System |
| <b>P14</b> | Mixture of Chemical | 33g/L Avermectin*Bifenthrin emulsifiable concentrate           | 40ul/L  | 747  | 357 | 390  | Nervous System                        |
| <b>P15</b> | Mixture of Chemical | 34% Spinetoram*Methoxyfenozide suspension concentrate          | 30ul/L  | 547  | 271 | 276  | Nervous System*Inhibit insect peeling |
| <b>P16</b> | Mixture of Chemical | 40% Bifenthrin*Thiacloprid suspension concentrate              | 30ul/L  | 886  | 444 | 442  | Nervous System                        |
| <b>P17</b> | Mixture of Chemical | 10% Emamectin*Indoxacarb suspension concentrate                | 30ul/L  | 1880 | 662 | 1218 | Nervous System                        |
| <b>P18</b> | Mixture of Chemical | 12% Emamectin*Flutolanil microemulsion                         | 25ul/L  | 1842 | 558 | 1284 | Nervous System*Ryanodine Receptor     |
| <b>P19</b> | Mixture of Chemical | 40% Chlorantraniliprole*Thiamethoxam water dispersible granule | 2mg/L   | 2159 | 960 | 1199 | Ryanodine Receptor*Nervous System     |

|            |                 |                                                   |         |      |     |      |                        |
|------------|-----------------|---------------------------------------------------|---------|------|-----|------|------------------------|
| <b>P20</b> | Single Chemical | 50g/L Lufenuron emulsifiable concentrate          | 64ul/L  | 1778 | 738 | 1040 | Inhibit insect peeling |
| <b>P21</b> | Single Chemical | 10% Cyantraniliprole suspension concentrate       | 64ul/L  | 716  | 333 | 383  | Ryanodine Receptor     |
| <b>P22</b> | Single Chemical | 240g/L Metaflumizone suspension concentrate       | 160ul/L | 1758 | 683 | 1075 | Nervous System         |
| <b>P23</b> | Single Chemical | 35% Chlorantraniliprole water dispersible granule | 2mg/L   | 1290 | 541 | 749  | Ryanodine Receptor     |
| <b>CK</b>  |                 |                                                   | control |      |     |      |                        |

---

**Table S17 | The KEGG enrichment of up regulated and down regulated DEGs of 23 pesticide treatments.**

|      | KEGG_ID                                                             | No. of Pesticides |
|------|---------------------------------------------------------------------|-------------------|
| up   | map00073 Cutin, suberine and wax biosynthesis                       | 19                |
|      | map04146 Peroxisome                                                 | 16                |
|      | map03008 Ribosome biogenesis in eukaryotes                          | 16                |
|      | map04212 Longevity regulating pathway - worm                        | 14                |
|      | map00900 Terpenoid backbone biosynthesis                            | 8                 |
| down | map00511 Other glycan degradation                                   | 12                |
|      | map00051 Fructose and mannose metabolism                            | 11                |
|      | map00520 Amino sugar and nucleotide sugar metabolism                | 11                |
|      | map00604 Glycosphingolipid biosynthesis - ganglio series            | 10                |
|      | map01051 Biosynthesis of ansamycins                                 | 9                 |
|      | map00531 Glycosaminoglycan degradation                              | 9                 |
|      | map00052 Galactose metabolism                                       | 8                 |
|      | map00030 Pentose phosphate pathway                                  | 7                 |
|      | map00040 Pentose and glucuronate interconversions                   | 7                 |
|      | map00680 Methane metabolism                                         | 7                 |
|      | map00232 Caffeine metabolism                                        | 6                 |
|      | map00603 Glycosphingolipid biosynthesis - globo and isoglobo series | 6                 |
|      | map04142 Lysosome                                                   | 6                 |





|                 |        |                |     |     |     |      |     |      |      |      |      |      |      |      |     |     |      |     |      |      |      |      |      |      |      |     |     |
|-----------------|--------|----------------|-----|-----|-----|------|-----|------|------|------|------|------|------|------|-----|-----|------|-----|------|------|------|------|------|------|------|-----|-----|
| <b>SFR13092</b> | K15001 | <i>CYP 4</i>   | 0.0 | 0.0 | 0.0 | -2.2 | 0.0 | 0.0  | 0.0  | 0.0  | 0.0  | 0.0  | 0.0  | 0.0  | 0.0 | 0.0 | 0.0  | 0.0 | 0.0  | 0.0  | 0.0  | 0.0  | 0.0  | 0.0  | -1.5 | 0.0 | 0.0 |
| <b>SFR13093</b> | K07427 | <i>CYP 4V2</i> | 4.8 | 0.0 | 0.0 | 0.0  | 0.0 | 0.0  | 0.0  | 0.0  | 0.0  | 0.0  | 0.0  | 0.0  | 0.0 | 0.0 | 0.0  | 0.0 | 0.0  | 0.0  | 0.0  | 0.0  | 0.0  | 0.0  | 0.0  | 0.0 | 0.0 |
| <b>SFR13115</b> | K07427 | <i>CYP 4V2</i> | 0.0 | 0.0 | 0.0 | 0.0  | 0.0 | 0.0  | 0.0  | 3.1  | 0.0  | 0.0  | 0.0  | 0.0  | 0.0 | 0.0 | 0.0  | 0.0 | 0.0  | 0.0  | 0.0  | 0.0  | 0.0  | 0.0  | 0.0  | 1.8 | 0.0 |
| <b>SFR14715</b> | K00665 | FASN           | 0.0 | 0.0 | 0.0 | 0.0  | 0.0 | 0.0  | 0.0  | 0.0  | 0.0  | 0.0  | 0.0  | 0.0  | 0.0 | 0.0 | 0.0  | 0.0 | 0.0  | 0.0  | 0.0  | 0.0  | 0.0  | 0.0  | 0.0  | 0.0 | 0.0 |
| <b>SFR09671</b> | K17960 | <i>CYP 49A</i> | 0.0 | 0.0 | 0.0 | 0.0  | 0.0 | 0.0  | 0.0  | 0.0  | 2.7  | 0.0  | 0.0  | 0.0  | 0.0 | 0.0 | 0.0  | 0.0 | 0.0  | 0.0  | 0.0  | 0.0  | 0.0  | 0.0  | 2.4  | 0.0 | 0.0 |
| <b>SFR09673</b> | K17960 | <i>CYP 49A</i> | 0.0 | 0.0 | 0.0 | 2.7  | 2.4 | 0.0  | 2.9  | 0.0  | 0.0  | 3.4  | 2.9  | 2.9  | 0.0 | 2.3 | 2.7  | 2.7 | 3.1  | 3.1  | 2.4  | 2.3  | 0.0  | 3.6  | 2.5  | 0.0 | 0.0 |
| <b>SFR10410</b> | K17960 | <i>CYP 49A</i> | 0.0 | 0.0 | 0.0 | 2.6  | 2.2 | 0.0  | 2.5  | 0.0  | 0.0  | 2.1  | 2.4  | 0.0  | 0.0 | 0.0 | 2.3  | 2.5 | 2.1  | 0.0  | 0.0  | 2.1  | 1.8  | 1.8  | 0.0  | 0.0 | 0.0 |
| <b>SFR02818</b> | K15001 | <i>CYP 4</i>   | 0.0 | 0.0 | 0.0 | 0.0  | 0.0 | 0.0  | 0.0  | 2.6  | 0.0  | 0.0  | 0.0  | 0.0  | 0.0 | 0.0 | 0.0  | 0.0 | 0.0  | 0.0  | 0.0  | 0.0  | 0.0  | 0.0  | 0.0  | 0.0 | 0.0 |
| <b>SFR21906</b> | K10723 | SHD            | 0.0 | 0.0 | 0.0 | 0.0  | 0.0 | 0.0  | 0.0  | -1.9 | -1.8 | 0.0  | 0.0  | -2.8 | 0.0 | 0.0 | 0.0  | 0.0 | 0.0  | -1.4 | 0.0  | -1.1 | -1.2 | 0.0  | 0.0  | 0.0 | 0.0 |
| <b>SFR11880</b> | K15001 | <i>CYP 4</i>   | 2.9 | 0.0 | 0.0 | 0.0  | 0.0 | -2.7 | -3.0 | -2.2 | 0.0  | 0.0  | 0.0  | 0.0  | 0.0 | 0.0 | 0.0  | 0.0 | 0.0  | 0.0  | 0.0  | 0.0  | 0.0  | 0.0  | 0.0  | 0.0 | 0.0 |
| <b>SFR11881</b> | K07427 | <i>CYP 4V2</i> | 4.3 | 0.0 | 0.0 | 0.0  | 2.6 | 0.0  | 0.0  | 0.0  | 0.0  | 0.0  | 0.0  | 0.0  | 0.0 | 0.0 | 0.0  | 0.0 | 0.0  | 0.0  | 0.0  | 0.0  | 0.0  | 0.0  | 0.0  | 0.0 | 0.0 |
| <b>SFR11884</b> | K07427 | <i>CYP 4V2</i> | 6.2 | 0.0 | 0.0 | 3.0  | 3.6 | 0.0  | 0.0  | 0.0  | 0.0  | 0.0  | 0.0  | 0.0  | 0.0 | 3.3 | 0.0  | 0.0 | 2.8  | 3.2  | 0.0  | 3.9  | 0.0  | 0.0  | 3.0  | 3.0 | 0.0 |
| <b>SFR11886</b> | K07427 | <i>CYP 4V2</i> | 4.5 | 0.0 | 0.0 | 2.3  | 0.0 | 0.0  | 0.0  | 4.6  | 0.0  | 0.0  | 0.0  | 0.0  | 0.0 | 0.0 | 0.0  | 0.0 | 0.0  | 0.0  | 0.0  | 0.0  | 0.0  | 0.0  | 0.0  | 0.0 | 0.0 |
| <b>SFR11887</b> | K07427 | <i>CYP 4V2</i> | 0.0 | 0.0 | 0.0 | 0.0  | 0.0 | 0.0  | 0.0  | 0.0  | 0.0  | 0.0  | 2.7  | 0.0  | 0.0 | 0.0 | 0.0  | 0.0 | 0.0  | 0.0  | 0.0  | 0.0  | 0.0  | 0.0  | 0.0  | 0.0 | 0.0 |
| <b>SFR15284</b> | K07427 | <i>CYP 4V2</i> | 0.0 | 0.0 | 0.0 | 0.0  | 0.0 | 0.0  | 0.0  | -2.1 | 0.0  | -2.1 | 0.0  | 0.0  | 0.0 | 0.0 | 0.0  | 0.0 | 0.0  | 0.0  | 0.0  | 0.0  | 0.0  | 0.0  | 0.0  | 0.0 | 0.0 |
| <b>SFR21631</b> | K00665 | FASN           | 0.0 | 0.0 | 0.0 | 0.0  | 0.0 | 0.0  | 0.0  | 0.0  | 0.0  | 0.0  | 0.0  | 0.0  | 0.0 | 0.0 | 0.0  | 0.0 | 0.0  | 0.0  | 0.0  | 0.0  | 0.0  | -3.1 | 0.0  | 0.0 | 0.0 |
| <b>SFR09608</b> | K15001 | <i>CYP 4</i>   | 0.0 | 0.0 | 0.0 | 0.0  | 0.0 | 1.8  | 0.0  | 0.0  | 2.3  | 0.0  | 0.0  | 2.4  | 0.0 | 0.0 | 0.0  | 0.0 | 0.0  | 1.9  | 0.0  | 0.0  | 0.0  | 0.0  | 0.0  | 0.0 | 0.0 |
| <b>SFR14812</b> | K14939 | SPO            | 0.0 | 0.0 | 0.0 | 0.0  | 0.0 | 0.0  | 0.0  | -2.6 | 0.0  | 0.0  | 0.0  | 0.0  | 0.0 | 0.0 | 0.0  | 0.0 | 0.0  | -2.1 | 0.0  | 0.0  | 0.0  | 0.0  | 0.0  | 0.0 | 0.0 |
| <b>SFR19924</b> | K14999 | <i>CYP 6</i>   | 0.0 | 0.0 | 0.0 | -2.8 | 0.0 | 0.0  | 0.0  | -2.4 | 0.0  | 0.0  | -2.6 | -2.8 | 0.0 | 0.0 | -2.1 | 0.0 | -1.9 | -2.5 | -2.3 | -2.6 | 0.0  | -2.3 | -3.3 | 0.0 | 0.0 |
| <b>SFR02268</b> | K07427 | <i>CYP 4V2</i> | 3.0 | 0.0 | 0.0 | 0.0  | 0.0 | 0.0  | 0.0  | 0.0  | 0.0  | 0.0  | 0.0  | 0.0  | 0.0 | 0.0 | 0.0  | 0.0 | 0.0  | 0.0  | 0.0  | 0.0  | 0.0  | 0.0  | 0.0  | 0.0 | 0.0 |
| <b>SFR05805</b> | K14999 | <i>CYP 6</i>   | 0.0 | 0.0 | 0.0 | 0.0  | 0.0 | 0.0  | 0.0  | 0.0  | 0.0  | 0.0  | 0.0  | 0.0  | 0.0 | 0.0 | 0.0  | 0.0 | 0.0  | 0.0  | 0.0  | 0.0  | -2.3 | 0.0  | 0.0  | 0.0 | 0.0 |
| <b>SFR01390</b> | K07427 | <i>CYP 4V2</i> | 4.2 | 0.0 | 0.0 | 0.0  | 0.0 | 0.0  | 0.0  | 0.0  | 0.0  | 0.0  | 0.0  | 0.0  | 0.0 | 0.0 | 0.0  | 0.0 | 0.0  | 0.0  | 0.0  | 0.0  | 0.0  | 0.0  | 0.0  | 0.0 | 0.0 |
| <b>SFR17475</b> | K07427 | <i>CYP 4V2</i> | 0.0 | 0.0 | 0.0 | 0.0  | 0.0 | 2.3  | 0.0  | 2.4  | 0.0  | 1.6  | 0.0  | 0.0  | 0.0 | 0.0 | 0.0  | 0.0 | 0.0  | 0.0  | 0.0  | 0.0  | 0.0  | 0.0  | 0.0  | 0.0 | 0.0 |
| <b>SFR17294</b> | K07427 | <i>CYP 4V2</i> | 0.0 | 0.0 | 0.0 | 2.2  | 0.0 | 0.0  | 0.0  | 2.5  | 1.9  | 0.0  | 2.2  | 0.0  | 0.0 | 0.0 | 0.0  | 0.0 | 0.0  | 0.0  | 0.0  | 0.0  | 1.6  | 0.0  | 0.0  | 0.0 | 0.0 |
| <b>SFR20970</b> | K15001 | <i>CYP 4</i>   | 0.0 | 0.0 | 0.0 | 2.2  | 2.1 | 0.0  | 2.4  | 3.3  | 2.3  | 1.7  | 2.2  | 0.0  | 0.0 | 0.0 | 0.0  | 1.8 | 2.0  | 2.2  | 2.3  | 0.0  | 0.0  | 2.3  | 0.0  | 0.0 | 0.0 |
| <b>SFR00950</b> | K15004 | <i>CYP 12</i>  | 0.0 | 0.0 | 0.0 | 0.0  | 0.0 | 0.0  | 2.2  | 0.0  | 0.0  | 0.0  | 0.0  | 0.0  | 0.0 | 0.0 | 0.0  | 0.0 | 0.0  | 0.0  | 0.0  | 0.0  | 0.0  | 0.0  | 0.0  | 0.0 | 0.0 |
| <b>SFR00951</b> | K15004 | <i>CYP 12</i>  | 0.0 | 0.0 | 0.0 | 0.0  | 0.0 | 0.0  | 2.2  | 0.0  | 0.0  | 0.0  | 0.0  | 0.0  | 0.0 | 0.0 | 0.0  | 0.0 | 0.0  | 0.0  | 0.0  | 0.0  | 0.0  | 0.0  | 0.0  | 0.0 | 0.0 |
| <b>SFR17237</b> | K15001 | <i>CYP 4</i>   | 1.9 | 2.7 | 0.0 | 0.0  | 0.0 | 2.6  | 3.5  | 4.1  | 3.1  | 1.3  | 3.3  | 2.0  | 0.0 | 0.0 | 1.7  | 2.3 | 1.6  | 1.9  | 1.7  | 0.0  | 0.0  | 0.0  | 0.0  | 0.0 | 0.0 |
| <b>SFR20076</b> | K07427 | <i>CYP 4V2</i> | 3.9 | 0.0 | 0.0 | 0.0  | 0.0 | 0.0  | 0.0  | 0.0  | 0.0  | 0.0  | 0.0  | 0.0  | 0.0 | 0.0 | 0.0  | 3.0 | 0.0  | 0.0  | 2.8  | 0.0  | 0.0  | 0.0  | 0.0  | 0.0 | 2.7 |
| <b>SFR20561</b> | K07427 | <i>CYP 4V2</i> | 0.0 | 0.0 | 0.0 | 2.7  | 0.0 | 3.8  | 1.6  | 3.9  | 2.4  | 2.2  | 2.9  | 0.0  | 0.0 | 0.0 | 0.0  | 2.3 | 0.0  | 0.0  | 1.5  | 0.0  | 0.0  | 0.0  | 0.0  | 0.0 | 0.0 |

|                 |        |                |     |      |     |      |     |      |     |      |      |      |      |      |      |      |      |      |      |      |      |      |      |      |      |
|-----------------|--------|----------------|-----|------|-----|------|-----|------|-----|------|------|------|------|------|------|------|------|------|------|------|------|------|------|------|------|
| <b>SFR20450</b> | K14999 | <i>CYP 6</i>   | 0.0 | 0.0  | 0.0 | -2.4 | 0.0 | -2.2 | 0.0 | 0.0  | -1.8 | -1.3 | -2.2 | 0.0  | 0.0  | 0.0  | -2.6 | 0.0  | -1.5 | -3.3 | 0.0  | -2.2 | -2.8 | -2.1 | -2.5 |
| <b>SFR20451</b> | K14999 | <i>CYP 6</i>   | 0.0 | 0.0  | 0.0 | -2.5 | 0.0 | -2.2 | 0.0 | -1.4 | -1.9 | -1.4 | -2.3 | 0.0  | 0.0  | 0.0  | -2.7 | 0.0  | -1.6 | -3.4 | -1.7 | -2.3 | -2.8 | -2.3 | -2.6 |
| <b>SFR14275</b> | K15001 | <i>CYP 4</i>   | 2.5 | 3.7  | 0.0 | 0.0  | 0.0 | 2.0  | 3.1 | 4.5  | 3.5  | 0.0  | 3.4  | 0.0  | 0.0  | 1.8  | 0.0  | 0.0  | 2.2  | 2.6  | 2.7  | 2.4  | 0.0  | 1.6  | 0.0  |
| <b>SFR00954</b> | K14999 | <i>CYP 6</i>   | 0.0 | 0.0  | 0.0 | 0.0  | 0.0 | 0.0  | 0.0 | 0.0  | 0.0  | 0.0  | 0.0  | 0.0  | 0.0  | 0.0  | 0.0  | 0.0  | 0.0  | 0.0  | 0.0  | 0.0  | 0.0  | 0.0  | 0.0  |
| <b>SFR21423</b> | K00665 | FASN           | 0.0 | 0.0  | 0.0 | 0.0  | 0.0 | 0.0  | 0.0 | 0.0  | 0.0  | 0.0  | 0.0  | 0.0  | 0.0  | 0.0  | 0.0  | 0.0  | 0.0  | 0.0  | 0.0  | -3.3 | 0.0  | 0.0  | 0.0  |
| <b>SFR12623</b> | K07427 | <i>CYP 4V2</i> | 0.0 | 0.0  | 0.0 | 0.0  | 0.0 | 0.0  | 0.0 | 3.0  | 0.0  | 0.0  | 0.0  | 0.0  | 0.0  | 0.0  | 0.0  | 0.0  | 0.0  | 0.0  | 0.0  | 0.0  | 0.0  | 1.8  | 0.0  |
| <b>SFR14585</b> | K00665 | FASN           | 0.0 | 0.0  | 0.0 | 0.0  | 0.0 | 0.0  | 0.0 | 0.0  | 0.0  | -3.5 | 0.0  | 0.0  | 0.0  | 0.0  | 0.0  | 0.0  | -3.9 | 0.0  | 0.0  | 0.0  | 0.0  | 0.0  | 0.0  |
| <b>SFR14295</b> | K15001 | <i>CYP 4</i>   | 0.0 | 0.0  | 0.0 | 0.0  | 0.0 | 0.0  | 0.0 | 0.0  | 0.0  | 0.0  | 0.0  | 0.0  | 0.0  | 0.0  | 0.0  | 0.0  | 0.0  | 0.0  | 0.0  | 2.3  | 0.0  | 0.0  | 0.0  |
| <b>SFR17550</b> | K07427 | <i>CYP 4V2</i> | 0.0 | 0.0  | 4.3 | 3.1  | 0.0 | 4.4  | 6.2 | 0.0  | 5.3  | 0.0  | 0.0  | 0.0  | 0.0  | 0.0  | 4.3  | 0.0  | 0.0  | 0.0  | 0.0  | 0.0  | 0.0  | 0.0  | 0.0  |
| <b>SFR14625</b> | K00665 | FASN           | 0.0 | 0.0  | 0.0 | 0.0  | 0.0 | 0.0  | 0.0 | 0.0  | 0.0  | 0.0  | 0.0  | 0.0  | 0.0  | 0.0  | 0.0  | 0.0  | 0.0  | -2.1 | -2.2 | 0.0  | 0.0  | 0.0  | 0.0  |
| <b>SFR20036</b> | K07427 | <i>CYP 4V2</i> | 0.0 | 0.0  | 0.0 | 0.0  | 0.0 | 0.0  | 0.0 | 0.0  | 0.0  | -3.1 | 0.0  | 0.0  | 0.0  | 0.0  | 0.0  | 0.0  | 0.0  | 0.0  | 0.0  | 0.0  | 0.0  | 0.0  | 0.0  |
| <b>SFR06492</b> | K14999 | <i>CYP 6</i>   | 0.0 | 0.0  | 0.0 | 0.0  | 0.0 | 0.0  | 0.0 | 0.0  | 0.0  | 0.0  | 0.0  | 0.0  | 0.0  | 0.0  | 0.0  | 0.0  | 0.0  | 0.0  | 0.0  | 0.0  | 0.0  | -2.3 | 0.0  |
| <b>SFR12089</b> | K07427 | <i>CYP 4V2</i> | 0.0 | 0.0  | 0.0 | 0.0  | 0.0 | 0.0  | 2.6 | 0.0  | 0.0  | 0.0  | 0.0  | 0.0  | 0.0  | 0.0  | 0.0  | 0.0  | 0.0  | 0.0  | 0.0  | 0.0  | 0.0  | 0.0  | 0.0  |
| <b>SFR20528</b> | K07427 | <i>CYP 4V2</i> | 0.0 | 0.0  | 0.0 | 0.0  | 0.0 | 0.0  | 2.8 | 2.3  | 0.0  | 0.0  | 0.0  | 0.0  | 0.0  | 0.0  | 0.0  | 0.0  | 0.0  | 0.0  | 0.0  | 0.0  | 0.0  | 0.0  | 0.0  |
| <b>SFR19543</b> | K14999 | <i>CYP 6</i>   | 3.6 | 0.0  | 4.9 | 0.0  | 0.0 | 0.0  | 0.0 | 0.0  | 0.0  | 0.0  | 0.0  | 0.0  | 0.0  | 2.7  | 0.0  | 0.0  | 0.0  | 0.0  | 0.0  | 0.0  | 0.0  | 0.0  | 0.0  |
| <b>SFR20982</b> | K00665 | FASN           | 0.0 | 0.0  | 2.8 | 2.9  | 3.2 | 0.0  | 0.0 | 2.5  | 2.7  | 2.7  | 3.3  | 0.0  | 0.0  | 2.7  | 0.0  | 2.9  | 2.8  | 3.3  | 0.0  | 3.4  | 0.0  | 2.9  | 3.8  |
| <b>SFR05026</b> | K07427 | <i>CYP 4V2</i> | 0.0 | 0.0  | 0.0 | 0.0  | 0.0 | 0.0  | 0.0 | 0.0  | 0.0  | 0.0  | 0.0  | 0.0  | 0.0  | 0.0  | 0.0  | 0.0  | 0.0  | 0.0  | 0.0  | 0.0  | 0.0  | 0.0  | 0.0  |
| <b>SFR11808</b> | K07427 | <i>CYP 4V2</i> | 0.0 | 0.0  | 0.0 | 0.0  | 0.0 | 0.0  | 0.0 | 0.0  | -2.6 | -2.5 | 0.0  | 0.0  | 0.0  | 0.0  | 0.0  | 0.0  | -2.6 | 0.0  | 0.0  | 0.0  | 0.0  | -2.5 | -2.4 |
| <b>SFR20959</b> | K14999 | <i>CYP 6</i>   | 0.0 | 0.0  | 0.0 | 0.0  | 0.0 | 0.0  | 0.0 | 0.0  | -2.1 | -1.9 | 0.0  | -2.5 | 0.0  | -2.4 | 0.0  | 0.0  | -3.1 | 0.0  | -2.7 | -2.6 | -2.3 | -3.1 |      |
| <b>SFR20960</b> | K14999 | <i>CYP 6</i>   | 0.0 | 0.0  | 0.0 | 0.0  | 0.0 | -1.9 | 0.0 | 0.0  | 0.0  | -2.3 | -2.4 | 0.0  | -2.7 | 0.0  | -2.7 | 0.0  | 0.0  | -3.7 | -2.0 | -2.6 | -2.9 | -2.7 | -3.2 |
| <b>SFR18467</b> | K15003 | <i>CYP 9</i>   | 0.0 | -3.2 | 0.0 | -2.1 | 0.0 | -1.7 | 0.0 | -3.0 | -1.7 | -1.6 | -2.3 | -2.4 | 0.0  | 0.0  | 0.0  | -1.4 | -2.2 | -1.9 | -2.0 | -2.8 | -1.6 | -2.8 | -1.7 |
| <b>SFR05875</b> | K15001 | <i>CYP 4</i>   | 0.0 | 0.0  | 0.0 | 0.0  | 0.0 | 0.0  | 0.0 | 0.0  | 0.0  | 0.0  | 0.0  | 0.0  | 0.0  | 0.0  | 0.0  | 0.0  | 0.0  | 0.0  | 0.0  | 0.0  | 0.0  | 1.2  | 0.0  |
| <b>SFR19922</b> | K14999 | <i>CYP 6</i>   | 0.0 | 0.0  | 0.0 | -2.5 | 0.0 | -3.0 | 0.0 | -1.8 | 0.0  | 0.0  | 0.0  | -3.2 | -2.5 | 0.0  | 0.0  | 0.0  | 0.0  | -2.2 | -2.6 | -2.5 | -2.4 | -2.2 | -2.6 |

**Table S19 | The DEGs of Azadirachtin significantly enriched in 34 KEGG pathway.**

| #Term                          | ID       | Input number | Background number | P-Value  | Corrected P-Value | Input                                                                                                                                                                                                                                                                                                                                                                                                                                                                                                                                                                                  |
|--------------------------------|----------|--------------|-------------------|----------|-------------------|----------------------------------------------------------------------------------------------------------------------------------------------------------------------------------------------------------------------------------------------------------------------------------------------------------------------------------------------------------------------------------------------------------------------------------------------------------------------------------------------------------------------------------------------------------------------------------------|
| <b>Metabolic pathways</b>      | hsa01100 | 63           | 1243              | 6.57E-29 | 7.87E-27          | SFR13509 SFR15666 SFR17845 SFR13761 SFR12967 SFR22106 SFR03885 SFR20883 SFR05689 SFR06338 SFR05602 SFR16595 SFR13178 SFR19435 SFR13913 SFR18232 SFR15870 SFR01157 SFR13030 SFR13174 SFR13176 SFR12103 SFR03661 SFR06067 SFR10410 SFR15191 SFR08977 SFR12470 SFR18509 SFR18647 SFR19632 SFR13323 SFR05333 SFR19924 SFR05415 SFR21290 SFR20660 SFR00991 SFR15133 SFR03171 SFR17913 SFR20450 SFR20451 SFR08155 SFR02735 SFR02133 SFR20350 SFR17310 SFR18501 SFR03637 SFR03023 SFR02520 SFR02217 SFR19620 SFR05789 SFR04436 SFR02148 SFR02723 SFR17953 SFR05548 SFR13563 SFR20619 SFR07202 |
| <b>Peroxisome</b>              | hsa04146 | 20           | 83                | 1.53E-21 | 1.16E-19          | SFR21337 SFR14877 SFR02520 SFR04997 SFR03768 SFR03885 SFR14884 SFR14879 SFR16238 SFR18509 SFR13601 SFR10391 SFR10392 SFR10393 SFR17913 SFR05602 SFR04770 SFR15128 SFR05605 SFR18740                                                                                                                                                                                                                                                                                                                                                                                                    |
| <b>Chemical carcinogenesis</b> | hsa05204 | 18           | 82                | 6.91E-19 | 3.72E-17          | SFR21040 SFR13178 SFR20350 SFR19924 SFR17310 SFR02735 SFR13174 SFR20451 SFR13176 SFR12103 SFR02217 SFR20883 SFR17939 SFR06338 SFR18467 SFR20450 SFR16595 SFR05333                                                                                                                                                                                                                                                                                                                                                                                                                      |
| <b>Retinol metabolism</b>      | hsa00830 | 15           | 65                | 3.09E-16 | 1.33E-14          | SFR13178 SFR19924 SFR02859 SFR02735 SFR13174 SFR20451 SFR13176 SFR12103 SFR03661 SFR02217 SFR20883 SFR02723 SFR06338 SFR20450 SFR16595                                                                                                                                                                                                                                                                                                                                                                                                                                                 |



|                                                     |          |    |     |          |          |                                                                                                                                        |
|-----------------------------------------------------|----------|----|-----|----------|----------|----------------------------------------------------------------------------------------------------------------------------------------|
| <b>Drug metabolism - cytochrome P450</b>            | hsa00982 | 15 | 69  | 6.68E-16 | 2.77E-14 | SFR13178 SFR20350 SFR19924 SFR02735 SFR02217 SFR20451 SFR13176 SFR12103 SFR03661 SFR20883 SFR17939 SFR06338 SFR20450 SFR16595 SFR05333 |
| <b>Metabolism of xenobiotics by cytochrome P450</b> | hsa00980 | 15 | 73  | 1.39E-15 | 5.49E-14 | SFR21040 SFR13178 SFR20350 SFR19924 SFR17310 SFR02735 SFR02217 SFR20451 SFR13176 SFR12103 SFR20883 SFR17939 SFR06338 SFR20450 SFR16595 |
| <b>Steroid hormone biosynthesis</b>                 | hsa00140 | 13 | 58  | 4.18E-14 | 1.45E-12 | SFR13178 SFR19924 SFR02217 SFR02735 SFR13174 SFR20451 SFR13176 SFR12103 SFR22106 SFR20883 SFR06338 SFR20450 SFR16595                   |
| <b>Ribosome biogenesis in eukaryotes</b>            | hsa03008 | 14 | 89  | 3.22E-13 | 1.01E-11 | SFR03498 SFR10638 SFR10636 SFR18709 SFR17185 SFR03868 SFR12386 SFR11573 SFR17946 SFR03892 SFR02707 SFR20236 SFR18907 SFR05621          |
| <b>Glycine, serine and threonine metabolism</b>     | hsa00260 | 8  | 40  | 7.73E-09 | 1.45E-07 | SFR13509 SFR05415 SFR02520 SFR06067 SFR15133 SFR17913 SFR05602 SFR19632                                                                |
| <b>Drug metabolism - other enzymes</b>              | hsa00983 | 8  | 46  | 2.04E-08 | 3.52E-07 | SFR13178 SFR02217 SFR13176 SFR12103 SFR03885 SFR20883 SFR18509 SFR16595                                                                |
| <b>Linoleic acid metabolism</b>                     | hsa00591 | 7  | 29  | 2.21E-08 | 3.80E-07 | SFR13178 SFR02217 SFR13176 SFR20883 SFR16595 SFR08155 SFR05333                                                                         |
| <b>Bile secretion</b>                               | hsa04976 | 9  | 71  | 3.15E-08 | 5.35E-07 | SFR21040 SFR13178 SFR16952 SFR02217 SFR13176 SFR12103 SFR20883 SFR21413 SFR16595                                                       |
| <b>Purine metabolism</b>                            | hsa00230 | 11 | 176 | 7.70E-07 | 1.03E-05 | SFR02133 SFR18501 SFR13913 SFR12895 SFR01157 SFR00991 SFR17247 SFR03885 SFR05773 SFR18509 SFR02148                                     |
| <b>Alanine, aspartate and glutamate</b>             | hsa00250 | 6  | 35  | 1.35E-06 | 1.74E-05 | SFR13761 SFR02520 SFR05789 SFR17913 SFR05602 SFR                                                                                       |

|                                                    |          |   |     |          |          |                                                                         |
|----------------------------------------------------|----------|---|-----|----------|----------|-------------------------------------------------------------------------|
| <b>metabolism</b>                                  |          |   |     |          |          | 15128                                                                   |
| <b>Amino sugar and nucleotide sugar metabolism</b> | hsa00520 | 6 | 48  | 7.08E-06 | 8.03E-05 | SFR03023 SFR13030 SFR05789 SFR13563 SFR20619 SFR18647                   |
| <b>Carbon metabolism</b>                           | hsa01200 | 8 | 113 | 1.07E-05 | 0.000116 | SFR03637 SFR18232 SFR15870 SFR02520 SFR17953 SFR17913 SFR03171 SFR05602 |
| <b>ECM-receptor interaction</b>                    | hsa04512 | 6 | 82  | 0.000116 | 0.001017 | SFR19174 SFR16368 SFR11223 SFR11222 SFR04584 SFR07272                   |
| <b>Arachidonic acid metabolism</b>                 | hsa00590 | 5 | 62  | 0.000286 | 0.00228  | SFR20350 SFR13323 SFR17310 SFR08155 SFR05333                            |
| <b>Amoebiasis</b>                                  | hsa05146 | 6 | 100 | 0.000321 | 0.002539 | SFR16774 SFR06354 SFR11223 SFR11222 SFR04584 SFR21938                   |
| <b>Aminoacyl-tRNA biosynthesis</b>                 | hsa00970 | 5 | 66  | 0.000374 | 0.002903 | SFR15821 SFR11257 SFR05153 SFR05401 SFR04884                            |
| <b>Glycolysis / Gluconeogenesis</b>                | hsa00010 | 5 | 67  | 0.000399 | 0.00307  | SFR03637 SFR05689 SFR03171 SFR15666 SFR18232                            |
| <b>Other glycan degradation</b>                    | hsa00511 | 3 | 18  | 0.000748 | 0.005395 | SFR09227 SFR15191 SFR00638                                              |
| <b>Complement and coagulation cascades</b>         | hsa04610 | 5 | 79  | 0.00081  | 0.005804 | SFR12411 SFR12407 SFR09068 SFR00831 SFR09065                            |
| <b>Terpenoid backbone biosynthesis</b>             | hsa00900 | 3 | 22  | 0.001261 | 0.008311 | SFR16674 SFR19435 SFR08902                                              |

|                                                 |          |   |     |          |          |                                                       |
|-------------------------------------------------|----------|---|-----|----------|----------|-------------------------------------------------------|
| <b>Caffeine metabolism</b>                      | hsa00232 | 2 | 5   | 0.001506 | 0.009425 | SFR18509 SFR03885                                     |
| <b>Glycerophospholipid metabolism</b>           | hsa00564 | 5 | 95  | 0.001768 | 0.010889 | SFR21290 SFR12967 SFR05246 SFR08155 SFR18201          |
| <b>Glyoxylate and dicarboxylate metabolism</b>  | hsa00630 | 3 | 28  | 0.002373 | 0.013807 | SFR17913 SFR05602 SFR02520                            |
| <b>RNA polymerase</b>                           | hsa03020 | 3 | 32  | 0.003368 | 0.017953 | SFR18501 SFR01157 SFR00991                            |
| <b>Fructose and mannose metabolism</b>          | hsa00051 | 3 | 33  | 0.003651 | 0.019201 | SFR17845 SFR03709 SFR13738                            |
| <b>Pentose and glucuronate interconversions</b> | hsa00040 | 3 | 36  | 0.004586 | 0.023146 | SFR17845 SFR12103 SFR15666                            |
| <b>Influenza A</b>                              | hsa05164 | 6 | 176 | 0.005093 | 0.025388 | SFR03790 SFR19435 SFR14423 SFR08994 SFR20610 SFR21469 |
| <b>Fat digestion and absorption</b>             | hsa04975 | 3 | 41  | 0.006439 | 0.029952 | SFR16952 SFR21323 SFR08155                            |
| <b>Spliceosome</b>                              | hsa03040 | 5 | 134 | 0.007205 | 0.032668 | SFR14272 SFR18565 SFR08066 SFR03932 SFR10636          |
| <b>Protein digestion and absorption</b>         | hsa04974 | 4 | 90  | 0.008948 | 0.039011 | SFR04584 SFR21469 SFR11223 SFR11222                   |

---

**Table S20 | Information of 240 samples used in this study**

| Sample Identifier | Species                      | Sampling locations             | geographic location - latitude | geographic location - longitude | collection date | Tissue          | Sex     | Developmental stages |
|-------------------|------------------------------|--------------------------------|--------------------------------|---------------------------------|-----------------|-----------------|---------|----------------------|
| SFgdWGS           | <i>Spodoptera frugiperda</i> | China:Guangdong:Guangzhou      | N 23° 25'41"                   | E 113° 22'07"                   | 2019/5/24       | whole body      | Unknown | Sixth-instar         |
| SFynMstLFR        | <i>S. frugiperda</i>         | China:YunNan:Kunming           | N 25° 01'00"                   | E 102° 50'34"                   | 2019/5/22       | whole body      | Male    | Adult                |
| SFgdRNA_1         | <i>S. frugiperda</i>         | China:Guangdong:Guangzhou      | N 23° 25'41"                   | E 113° 22'07"                   | 2019/5/24       | whole body      | Unknown | Fifth-instar         |
| SFgdRNA_2         | <i>S. frugiperda</i>         | China:Guangdong:Guangzhou      | N 23° 25'41"                   | E 113° 22'07"                   | 2019/5/24       | whole body      | Unknown | Sixth-instar         |
| SFYN              | <i>S. frugiperda</i>         | China:YunNan:Kunming           | N 25° 01'00"                   | E 102° 50'34"                   | 2019/5/22       | whole body      | Unknown | Adult                |
| A1                | <i>S. frugiperda</i>         | USA:LA:Franklin Parish         | N 32°41'34.31"                 | W 91°41'34.31"                  | 2019/8/1        | thorax of adult | Unknown | Adult                |
| A10               | <i>S. frugiperda</i>         | USA:LA:Franklin Parish         | N 32°41'34.31"                 | W 91°41'34.31"                  | 2019/8/1        | thorax of adult | Unknown | Adult                |
| A2                | <i>S. frugiperda</i>         | USA:LA:Franklin Parish         | N 32°41'34.31"                 | W 91°41'34.31"                  | 2019/8/1        | thorax of adult | Unknown | Adult                |
| A3                | <i>S. frugiperda</i>         | USA:LA:Franklin Parish         | N 32°41'34.31"                 | W 91°41'34.31"                  | 2019/8/1        | thorax of adult | Unknown | Adult                |
| A4                | <i>S. frugiperda</i>         | USA:LA:Franklin Parish         | N 32°41'34.31"                 | W 91°41'34.31"                  | 2019/8/1        | thorax of adult | Unknown | Adult                |
| A5                | <i>S. frugiperda</i>         | USA:LA:Franklin Parish         | N 32°41'34.31"                 | W 91°41'34.31"                  | 2019/8/1        | thorax of adult | Unknown | Adult                |
| A6                | <i>S. frugiperda</i>         | USA:LA:Franklin Parish         | N 32°41'34.31"                 | W 91°41'34.31"                  | 2019/8/1        | thorax of adult | Unknown | Adult                |
| A7                | <i>S. frugiperda</i>         | USA:LA:Franklin Parish         | N 32°41'34.31"                 | W 91°41'34.31"                  | 2019/8/1        | thorax of adult | Unknown | Adult                |
| A8                | <i>S. frugiperda</i>         | USA:LA:Franklin Parish         | N 32°41'34.31"                 | W 91°41'34.31"                  | 2019/8/1        | thorax of adult | Unknown | Adult                |
| A9                | <i>S. frugiperda</i>         | USA:LA:Franklin Parish         | N 32°41'34.31"                 | W 91°41'34.31"                  | 2019/8/1        | thorax of adult | Unknown | Adult                |
| B1                | <i>S. frugiperda</i>         | USA:LA:East Baton Rouge Parish | N 30°24'15.05"                 | W 91°10'39.66"                  | 2017            | thorax of adult | Unknown | Adult                |

|      |                      |                                |                |                |           |                 |         |        |
|------|----------------------|--------------------------------|----------------|----------------|-----------|-----------------|---------|--------|
| B10  | <i>S. frugiperda</i> | USA:LA:East Baton Rouge Parish | N 30°24'15.05" | W 91°10'39.66" | 2017      | thorax of adult | Unknown | Adult  |
| B2   | <i>S. frugiperda</i> | USA:LA:East Baton Rouge Parish | N 30°24'15.05" | W 91°10'39.66" | 2017      | thorax of adult | Unknown | Adult  |
| B3   | <i>S. frugiperda</i> | USA:LA:East Baton Rouge Parish | N 30°24'15.05" | W 91°10'39.66" | 2017      | thorax of adult | Unknown | Adult  |
| B4   | <i>S. frugiperda</i> | USA:LA:East Baton Rouge Parish | N 30°24'15.05" | W 91°10'39.66" | 2017      | thorax of adult | Unknown | Adult  |
| B5   | <i>S. frugiperda</i> | USA:LA:East Baton Rouge Parish | N 30°24'15.05" | W 91°10'39.66" | 2017      | thorax of adult | Unknown | Adult  |
| B6   | <i>S. frugiperda</i> | USA:LA:East Baton Rouge Parish | N 30°24'15.05" | W 91°10'39.66" | 2017      | thorax of adult | Unknown | Adult  |
| B7   | <i>S. frugiperda</i> | USA:LA:East Baton Rouge Parish | N 30°24'15.05" | W 91°10'39.66" | 2017      | thorax of adult | Unknown | Adult  |
| B8   | <i>S. frugiperda</i> | USA:LA:East Baton Rouge Parish | N 30°24'15.05" | W 91°10'39.66" | 2017      | thorax of adult | Unknown | Adult  |
| B9   | <i>S. frugiperda</i> | USA:LA:East Baton Rouge Parish | N 30°24'15.05" | W 91°10'39.66" | 2017      | thorax of adult | Unknown | Adult  |
| BS01 | <i>S. frugiperda</i> | China:YunNan: Baoshan          | N 24° 98'04"   | E 99° 12'45"   | 2019/6/20 | whole body      | Unknown | Larvae |
| BS02 | <i>S. frugiperda</i> | China:YunNan: Baoshan          | N 24° 98'04"   | E 99° 12'45"   | 2019/6/20 | whole body      | Unknown | Larvae |
| C1   | <i>S. frugiperda</i> | USA:LA:Franklin Parish         | N 32°08'21.08" | W 91°41'12.37" | 2016/10/1 | thorax of adult | Unknown | Adult  |
| C10  | <i>S. frugiperda</i> | USA:LA:Franklin Parish         | N 32°08'21.08" | W 91°41'12.37" | 2016/10/1 | thorax of adult | Unknown | Adult  |
| C2   | <i>S. frugiperda</i> | USA:LA:Franklin Parish         | N 32°08'21.08" | W 91°41'12.37" | 2016/10/1 | thorax of adult | Unknown | Adult  |
| C3   | <i>S. frugiperda</i> | USA:LA:Franklin Parish         | N 32°08'21.08" | W 91°41'12.37" | 2016/10/1 | thorax of adult | Unknown | Adult  |
| C4   | <i>S. frugiperda</i> | USA:LA:Franklin Parish         | N 32°08'21.08" | W 91°41'12.37" | 2016/10/1 | thorax of adult | Unknown | Adult  |
| C6   | <i>S. frugiperda</i> | USA:LA:Franklin Parish         | N 32°08'21.08" | W 91°41'12.37" | 2016/10/1 | thorax of adult | Unknown | Adult  |
| C7   | <i>S. frugiperda</i> | USA:LA:Franklin Parish         | N 32°08'21.08" | W 91°41'12.37" | 2016/10/1 | thorax of adult | Unknown | Adult  |

|        |                      |                        |                               |                               |           |                            |         |              |
|--------|----------------------|------------------------|-------------------------------|-------------------------------|-----------|----------------------------|---------|--------------|
| C8     | <i>S. frugiperda</i> | USA:LA:Franklin Parish | N 32°08'21.08"                | W 91°41'12.37"                | 2016/10/1 | thorax of adult            | Unknown | Adult        |
| C9     | <i>S. frugiperda</i> | USA:LA:Franklin Parish | N 32°08'21.08"                | W 91°41'12.37"                | 2016/10/1 | thorax of adult            | Unknown | Adult        |
| D1     | <i>S. frugiperda</i> | USA:LA:Franklin Parish | Unknown                       | Unknown                       | Unknown   | thorax of adult            | Unknown | Adult        |
| D10    | <i>S. frugiperda</i> | USA:LA:Franklin Parish | Unknown                       | Unknown                       | Unknown   | thorax of adult            | Unknown | Adult        |
| D2     | <i>S. frugiperda</i> | USA:LA:Franklin Parish | Unknown                       | Unknown                       | Unknown   | thorax of adult            | Unknown | Adult        |
| D3     | <i>S. frugiperda</i> | USA:LA:Franklin Parish | Unknown                       | Unknown                       | Unknown   | thorax of adult            | Unknown | Adult        |
| D4     | <i>S. frugiperda</i> | USA:LA:Franklin Parish | Unknown                       | Unknown                       | Unknown   | thorax of adult            | Unknown | Adult        |
| D5     | <i>S. frugiperda</i> | USA:LA:Franklin Parish | Unknown                       | Unknown                       | Unknown   | thorax of adult            | Unknown | Adult        |
| D6     | <i>S. frugiperda</i> | USA:LA:Franklin Parish | Unknown                       | Unknown                       | Unknown   | thorax of adult            | Unknown | Adult        |
| D7     | <i>S. frugiperda</i> | USA:LA:Franklin Parish | Unknown                       | Unknown                       | Unknown   | thorax of adult            | Unknown | Adult        |
| D8     | <i>S. frugiperda</i> | USA:LA:Franklin Parish | Unknown                       | Unknown                       | Unknown   | thorax of adult            | Unknown | Adult        |
| D9     | <i>S. frugiperda</i> | USA:LA:Franklin Parish | Unknown                       | Unknown                       | Unknown   | thorax of adult            | Unknown | Adult        |
| FAW1.1 | <i>S. frugiperda</i> | South Africa:Gauteng   | Unknown (sample from culture) | Unknown (sample from culture) | 2019/6/1  | Head and epithelial tissue | Unknown | Sixth-instar |
| FAW1.2 | <i>S. frugiperda</i> | South Africa:Gauteng   | Unknown (sample from culture) | Unknown (sample from culture) | 2019/6/1  | Head and epithelial tissue | Unknown | Sixth-instar |
| FAW2.1 | <i>S. frugiperda</i> | South Africa:Gauteng   | Unknown (sample from culture) | Unknown (sample from culture) | 2019/6/1  | Head and epithelial tissue | Unknown | Sixth-instar |
| FAW2.2 | <i>S. frugiperda</i> | South Africa:Gauteng   | Unknown (sample from culture) | Unknown (sample from culture) | 2019/6/1  | Head and epithelial tissue | Unknown | Sixth-instar |

|        |                      |                               |               |                |            |                            |         |              |
|--------|----------------------|-------------------------------|---------------|----------------|------------|----------------------------|---------|--------------|
| FAW5.2 | <i>S. frugiperda</i> | South Africa:Limpopo:Tshiombo | S22.8046033   | E30.4972486    | 2019/10/1  | Head and epithelial tissue | Unknown | Sixth-instar |
| FJ01_1 | <i>S. frugiperda</i> | China: YunNan: Funing         | N 23° 34'76"  | E 105° 37'34"  | 2019/5/30  | whole body                 | Unknown | Adult        |
| FJ01_2 | <i>S. frugiperda</i> | China: YunNan: Funing         | N 23° 34'76"  | E 105° 37'34"  | 2019/5/30  | whole body                 | Unknown | Adult        |
| FJ01_3 | <i>S. frugiperda</i> | China: YunNan: Funing         | N 23° 34'76"  | E 105° 37'34"  | 2019/5/30  | whole body                 | Unknown | Adult        |
| GX01   | <i>S. frugiperda</i> | China:GuangXi:Nanning         | N 22°48'02"   | E 108°11'30"   | 2019/7/6   | whole body                 | Unknown | Larvae       |
| GX02   | <i>S. frugiperda</i> | China:GuangXi:Nanning         | N 22°48'02"   | E 108°11'30"   | 2019/7/6   | whole body                 | Unknown | Larvae       |
| GX03   | <i>S. frugiperda</i> | China:GuangXi:Nanning         | N 22°48'02"   | E 108°11'30"   | 2019/7/6   | whole body                 | Unknown | Larvae       |
| GX04   | <i>S. frugiperda</i> | China:GuangXi:Nanning         | N 22°48'02"   | E 108°11'30"   | 2019/7/6   | whole body                 | Unknown | Larvae       |
| JC01   | <i>S. frugiperda</i> | China:YunNan:Jiangcheng       | N 22°58'51"   | E 101°86'23"   | 2019/5/31  | whole body                 | Unknown | Larvae       |
| KE-1   | <i>S. frugiperda</i> | Kenya:Naivasha-Nakuru         | S0°53'44.3"   | E36°11'48.4"   | 2019/1/3   | muscle tissue              | Unknown | Larvae       |
| KE-10  | <i>S. frugiperda</i> | Kenya:Migori-Trans Nzoia      | N 01°09.411'  | E 034° 58.441' | 2018/12/28 | muscle tissue              | Unknown | Larvae       |
| KE-3   | <i>S. frugiperda</i> | Kenya:Meru                    | S0°06'05.9"   | E37°46'57.1"   | 2018/12/22 | muscle tissue              | Unknown | Larvae       |
| KE-4   | <i>S. frugiperda</i> | Kenya:Kilifi                  | S03.16561     | E040.00819     | 2018/12/22 | muscle tissue              | Unknown | Larvae       |
| KE-5   | <i>S. frugiperda</i> | Kenya:Makueni                 | S1°48'17.1"   | E37°34'07.6"   | 2018/12/23 | muscle tissue              | Unknown | Larvae       |
| KE-6   | <i>S. frugiperda</i> | Kenya:Nyeri                   | S0°32'25.5"   | E36°58'44.0"   | 2018/12/24 | muscle tissue              | Unknown | Larvae       |
| KE-7   | <i>S. frugiperda</i> | Kenya:Bungoma                 | N 00° 35.763' | E 034° 26.060' | 2018/12/25 | muscle tissue              | Unknown | Larvae       |
| KE-8   | <i>S. frugiperda</i> | Kenya:Bomet                   | S0°51'59.4"   | E35°23'17.2"   | 2018/12/26 | muscle tissue              | Unknown | Larvae       |
| KE-9   | <i>S. frugiperda</i> | Kenya:Taita Taveta            | S03.39148     | E038.57782     | 2018/12/27 | muscle tissue              | Unknown | Larvae       |
| LJ01   | <i>S. frugiperda</i> | China:YunNan:Lijiang          | N 26°87'72"   | E 100°22'54"   | 2019/7/15  | whole body                 | Unknown | Larvae       |
| LL01_2 | <i>S. frugiperda</i> | China:YunNan:Luliang          | N 25°02'94"   | E 103°66'68"   | 2019/7/18  | whole body                 | Unknown | Larvae       |
| LL01_3 | <i>S. frugiperda</i> | China:YunNan:Luliang          | N 25°02'94"   | E 103°66'68"   | 2019/7/18  | whole body                 | Unknown | Larvae       |
| LL04   | <i>S. frugiperda</i> | China:YunNan:Luliang          | N 25°02'94"   | E 103°66'68"   | 2019/7/18  | whole body                 | Unknown | Larvae       |
| LL05   | <i>S. frugiperda</i> | China:YunNan:Luliang          | N 25°02'94"   | E 103°66'68"   | 2019/7/18  | whole body                 | Unknown | Larvae       |
| LL06   | <i>S. frugiperda</i> | China:YunNan:Luliang          | N 25°02'94"   | E 103°66'68"   | 2019/7/18  | whole body                 | Unknown | Larvae       |

|        |                      |                                    |               |              |           |               |         |        |
|--------|----------------------|------------------------------------|---------------|--------------|-----------|---------------|---------|--------|
| LL09   | <i>S. frugiperda</i> | China:YunNan:Luliang               | N 25°02'94"   | E 103°66'68" | 2019/7/18 | whole body    | Unknown | Larvae |
| MH01   | <i>S. frugiperda</i> | China:YunNan:Menghai               | N 21°95'75"   | E 100°45'22" | 2019/7/4  | whole body    | Unknown | Larvae |
| MH03   | <i>S. frugiperda</i> | China:YunNan:Menghai               | N 21°95'75"   | E 100°45'22" | 2019/7/4  | whole body    | Unknown | Larvae |
| ML01   | <i>S. frugiperda</i> | China:YunNan:Malong                | N 25°42'80"   | E 103°57'83" | 2019/6/3  | whole body    | Unknown | Larvae |
| ML01_1 | <i>S. frugiperda</i> | China:YunNan:Malong                | N 25°42'80"   | E 103°57'83" | 2019/6/3  | whole body    | Unknown | Larvae |
| ML01_3 | <i>S. frugiperda</i> | China:YunNan:Malong                | N 25°42'80"   | E 103°57'83" | 2019/6/3  | whole body    | Unknown | Larvae |
| ML1    | <i>S. frugiperda</i> | Ethiopia:Oromia region:Melkassa    | N8°24'55.2"   | E39°19'39.2" | 2019/3/10 | muscle tissue | Unknown | Larvae |
| ML2    | <i>S. frugiperda</i> | Ethiopia:Oromia region:Melkassa    | N8°24'55.2"   | E39°19'39.2" | 2019/3/10 | muscle tissue | Unknown | Larvae |
| ML3    | <i>S. frugiperda</i> | Ethiopia:Oromia region:Melkassa    | N8°24'55.2"   | E39°19'39.2" | 2019/3/10 | muscle tissue | Unknown | Larvae |
| ML4    | <i>S. frugiperda</i> | Ethiopia:Oromia region:Melkassa    | N8°24'55.2"   | E39°19'39.2" | 2019/3/10 | muscle tissue | Unknown | Larvae |
| ML5    | <i>S. frugiperda</i> | Ethiopia:Oromia region:Melkassa    | N8°24'55.2"   | E39°19'39.2" | 2019/3/10 | muscle tissue | Unknown | Larvae |
| MS004  | <i>S. frugiperda</i> | China:YunNan:Mangshi               | N 24°43'37"   | E 98°58'81"  | 2019/7/5  | whole body    | Unknown | Adult  |
| MS03   | <i>S. frugiperda</i> | China:YunNan:Mangshi               | N 24°43'37"   | E 98°58'81"  | 2019/7/5  | whole body    | Unknown | Adult  |
| MZ01   | <i>S. frugiperda</i> | China:YunNan:Mengzi                | N 23°39'62"   | E 103°36'48" | 2019/7/16 | whole body    | Unknown | Adult  |
| NA1    | <i>S. frugiperda</i> | Ethiopia:Oromia region:Arsi Negele | N7°.09'07.41" | E38.25'54"   | 2019/8/19 | muscle tissue | Unknown | Larvae |
| NA12   | <i>S. frugiperda</i> | Ethiopia:Oromia region:Arsi Negele | N7°.09'07.41" | E38.25'54"   | 2019/8/19 | muscle tissue | Unknown | Larvae |
| NA14   | <i>S. frugiperda</i> | Ethiopia:Oromia region:Arsi Negele | N7°.09'07.41" | E38.25'54"   | 2019/8/19 | muscle tissue | Unknown | Larvae |
| NA15   | <i>S. frugiperda</i> | Ethiopia:Oromia region:Arsi Negele | N7°.09'07.41" | E38.25'54"   | 2019/8/19 | muscle tissue | Unknown | Larvae |
| NA4    | <i>S. frugiperda</i> | Ethiopia:Oromia region:Arsi Negele | N7°.09'07.41" | E38.25'54"   | 2019/8/19 | muscle tissue | Unknown | Larvae |
| NJ01   | <i>S. frugiperda</i> | China:YunNan:Nujiang               | N 25°81'76"   | E 98°85'67"  | 2019/7/25 | whole body    | Unknown | Larvae |
| NJ02   | <i>S. frugiperda</i> | China:YunNan:Nujiang               | N 25°81'76"   | E 98°85'67"  | 2019/7/25 | whole body    | Unknown | Larvae |
| NJ03   | <i>S. frugiperda</i> | China:YunNan:Nujiang               | N 25°81'76"   | E 98°85'67"  | 2019/7/25 | whole body    | Unknown | Larvae |
| NJ04   | <i>S. frugiperda</i> | China:YunNan:Nujiang               | N 25°81'76"   | E 98°85'67"  | 2019/7/25 | whole body    | Unknown | Larvae |
| NJ05   | <i>S. frugiperda</i> | China:YunNan:Nujiang               | N 25°81'76"   | E 98°85'67"  | 2019/7/25 | whole body    | Unknown | Larvae |



|      |                      |                       |             |              |           |                  |         |        |
|------|----------------------|-----------------------|-------------|--------------|-----------|------------------|---------|--------|
| NJ06 | <i>S. frugiperda</i> | China:YunNan:Nujiang  | N 25°81'76" | E 98°85'67"  | 2019/7/25 | whole body       | Unknown | Larvae |
| NJ07 | <i>S. frugiperda</i> | China:YunNan:Nujiang  | N 25°81'76" | E 98°85'67"  | 2019/7/25 | whole body       | Unknown | Larvae |
| NJ08 | <i>S. frugiperda</i> | China:YunNan:Nujiang  | N 25°81'76" | E 98°85'67"  | 2019/7/25 | whole body       | Unknown | Larvae |
| SC03 | <i>S. frugiperda</i> | China:GuangXi:Nanning | N 22°48'02" | E 108°11'30" | 2019/5/25 | muscle<br>tissue | Unknown | Larvae |
| SC08 | <i>S. frugiperda</i> | China:GuangXi:Nanning | N 22°48'02" | E 108°11'30" | 2019/5/26 | muscle<br>tissue | Unknown | Larvae |
| SC10 | <i>S. frugiperda</i> | China:GuangXi:Nanning | N 22°48'02" | E 108°11'30" | 2019/5/27 | muscle<br>tissue | Unknown | Larvae |
| SC11 | <i>S. frugiperda</i> | China:GuangXi:Nanning | N 22°48'02" | E 108°11'30" | 2019/5/28 | muscle<br>tissue | Unknown | Larvae |
| SC12 | <i>S. frugiperda</i> | China:GuangXi:Nanning | N 22°48'02" | E 108°11'30" | 2019/5/29 | muscle<br>tissue | Unknown | Larvae |
| SC13 | <i>S. frugiperda</i> | China:GuangXi:Nanning | N 22°48'02" | E 108°11'30" | 2019/5/30 | muscle<br>tissue | Unknown | Larvae |
| SC14 | <i>S. frugiperda</i> | China:GuangXi:Nanning | N 22°48'02" | E 108°11'30" | 2019/5/31 | muscle<br>tissue | Unknown | Larvae |
| SC15 | <i>S. frugiperda</i> | China:GuangXi:Nanning | N 22°48'02" | E 108°11'30" | 2019/6/1  | muscle<br>tissue | Unknown | Larvae |
| SC16 | <i>S. frugiperda</i> | China:GuangXi:Nanning | N 22°48'02" | E 108°11'30" | 2019/6/2  | muscle<br>tissue | Unknown | Larvae |
| SC17 | <i>S. frugiperda</i> | China:GuangXi:Nanning | N 22°48'02" | E 108°11'30" | 2019/6/3  | muscle<br>tissue | Unknown | Larvae |
| SC18 | <i>S. frugiperda</i> | China:GuangXi:Nanning | N 22°48'02" | E 108°11'30" | 2019/6/4  | muscle<br>tissue | Unknown | Larvae |
| SC19 | <i>S. frugiperda</i> | China:GuangXi:Nanning | N 22°48'02" | E 108°11'30" | 2019/6/5  | muscle<br>tissue | Unknown | Larvae |
| SC20 | <i>S. frugiperda</i> | China:GuangXi:Nanning | N 22°48'02" | E 108°11'30" | 2019/6/6  | muscle<br>tissue | Unknown | Larvae |
| SC21 | <i>S. frugiperda</i> | China:GuangXi:Nanning | N 22°48'02" | E 108°11'30" | 2019/6/7  | muscle<br>tissue | Unknown | Larvae |
| SC23 | <i>S. frugiperda</i> | China:GuangXi:Nanning | N 22°48'02" | E 108°11'30" | 2019/6/8  | muscle<br>tissue | Unknown | Larvae |
| SC24 | <i>S. frugiperda</i> | China:GuangXi:Nanning | N 22°48'02" | E 108°11'30" | 2019/6/9  | muscle<br>tissue | Unknown | Larvae |
| SC25 | <i>S. frugiperda</i> | China:GuangXi:Nanning | N 22°48'02" | E 108°11'30" | 2019/6/10 | muscle<br>tissue | Unknown | Larvae |
| SC26 | <i>S. frugiperda</i> | China:GuangXi:Nanning | N 22°48'02" | E 108°11'30" | 2019/6/11 | muscle<br>tissue | Unknown | Larvae |

|      |                      |                       |             |              |           |               |         |        |
|------|----------------------|-----------------------|-------------|--------------|-----------|---------------|---------|--------|
| SC27 | <i>S. frugiperda</i> | China:GuangXi:Nanning | N 22°48'02" | E 108°11'30" | 2019/6/12 | muscle tissue | Unknown | Larvae |
| SC28 | <i>S. frugiperda</i> | China:GuangXi:Nanning | N 22°48'02" | E 108°11'30" | 2019/6/13 | muscle tissue | Unknown | Larvae |
| SC29 | <i>S. frugiperda</i> | China:GuangXi:Nanning | N 22°48'02" | E 108°11'30" | 2019/6/14 | muscle tissue | Unknown | Larvae |
| SC30 | <i>S. frugiperda</i> | China:GuangXi:Nanning | N 22°48'02" | E 108°11'30" | 2019/6/15 | muscle tissue | Unknown | Larvae |
| SC31 | <i>S. frugiperda</i> | China:GuangXi:Nanning | N 22°48'02" | E 108°11'30" | 2019/6/16 | muscle tissue | Unknown | Larvae |
| SC32 | <i>S. frugiperda</i> | China:GuangXi:Nanning | N 22°48'02" | E 108°11'30" | 2019/6/17 | muscle tissue | Unknown | Larvae |
| SC33 | <i>S. frugiperda</i> | China:GuangXi:Nanning | N 22°48'02" | E 108°11'30" | 2019/6/18 | muscle tissue | Unknown | Larvae |
| SC34 | <i>S. frugiperda</i> | China:GuangXi:Nanning | N 22°48'02" | E 108°11'30" | 2019/6/19 | muscle tissue | Unknown | Larvae |
| SC35 | <i>S. frugiperda</i> | China:GuangXi:Nanning | N 22°48'02" | E 108°11'30" | 2019/6/20 | muscle tissue | Unknown | Larvae |
| SC36 | <i>S. frugiperda</i> | China:GuangXi:Nanning | N 22°48'02" | E 108°11'30" | 2019/6/21 | muscle tissue | Unknown | Larvae |
| SC37 | <i>S. frugiperda</i> | China:GuangXi:Nanning | N 22°48'02" | E 108°11'30" | 2019/6/22 | muscle tissue | Unknown | Larvae |
| SC38 | <i>S. frugiperda</i> | China:GuangXi:Nanning | N 22°48'02" | E 108°11'30" | 2019/6/23 | muscle tissue | Unknown | Larvae |
| SC39 | <i>S. frugiperda</i> | China:GuangXi:Nanning | N 22°48'02" | E 108°11'30" | 2019/6/24 | muscle tissue | Unknown | Larvae |
| SC40 | <i>S. frugiperda</i> | China:GuangXi:Nanning | N 22°48'02" | E 108°11'30" | 2019/6/25 | muscle tissue | Unknown | Larvae |
| SC41 | <i>S. frugiperda</i> | China:GuangXi:Nanning | N 22°48'02" | E 108°11'30" | 2019/6/26 | muscle tissue | Unknown | Larvae |
| SC42 | <i>S. frugiperda</i> | China:GuangXi:Nanning | N 22°48'02" | E 108°11'30" | 2019/6/27 | muscle tissue | Unknown | Larvae |
| SC43 | <i>S. frugiperda</i> | China:GuangXi:Nanning | N 22°48'02" | E 108°11'30" | 2019/6/28 | muscle tissue | Unknown | Larvae |
| SC44 | <i>S. frugiperda</i> | China:GuangXi:Nanning | N 22°48'02" | E 108°11'30" | 2019/6/29 | muscle tissue | Unknown | Larvae |
| SC45 | <i>S. frugiperda</i> | China:GuangXi:Nanning | N 22°48'02" | E 108°11'30" | 2019/6/30 | muscle tissue | Unknown | Larvae |
| SC46 | <i>S. frugiperda</i> | China:GuangXi:Nanning | N 22°48'02" | E 108°11'30" | 2019/7/1  | muscle tissue | Unknown | Larvae |

|      |                      |                            |             |              |           |               |         |        |
|------|----------------------|----------------------------|-------------|--------------|-----------|---------------|---------|--------|
| SC47 | <i>S. frugiperda</i> | China:GuangXi:Nanning      | N 22°48'02" | E 108°11'30" | 2019/7/2  | muscle tissue | Unknown | Larvae |
| SC48 | <i>S. frugiperda</i> | China:GuangXi:Nanning      | N 22°48'02" | E 108°11'30" | 2019/7/3  | muscle tissue | Unknown | Larvae |
| SC49 | <i>S. frugiperda</i> | China:GuangXi:Nanning      | N 22°48'02" | E 108°11'30" | 2019/7/4  | muscle tissue | Unknown | Larvae |
| SC50 | <i>S. frugiperda</i> | China:GuangXi:Nanning      | N 22°48'02" | E 108°11'30" | 2019/7/5  | muscle tissue | Unknown | Larvae |
| SC51 | <i>S. frugiperda</i> | China:GuangXi:Nanning      | N 22°48'02" | E 108°11'30" | 2019/7/6  | muscle tissue | Unknown | Larvae |
| SC52 | <i>S. frugiperda</i> | China:GuangXi:Nanning      | N 22°48'02" | E 108°11'30" | 2019/7/7  | muscle tissue | Unknown | Larvae |
| SC53 | <i>S. frugiperda</i> | China:GuangXi:Nanning      | N 22°48'02" | E 108°11'30" | 2019/7/8  | muscle tissue | Unknown | Larvae |
| SC54 | <i>S. frugiperda</i> | China:GuangXi:Nanning      | N 22°48'02" | E 108°11'30" | 2019/7/9  | muscle tissue | Unknown | Larvae |
| SC55 | <i>S. frugiperda</i> | China:GuangXi:Nanning      | N 22°48'02" | E 108°11'30" | 2019/7/10 | muscle tissue | Unknown | Larvae |
| SC56 | <i>S. frugiperda</i> | China:GuangXi:Nanning      | N 22°48'02" | E 108°11'30" | 2019/7/11 | muscle tissue | Unknown | Larvae |
| SC57 | <i>S. frugiperda</i> | China:GuangXi:Nanning      | N 22°48'02" | E 108°11'30" | 2019/7/12 | muscle tissue | Unknown | Larvae |
| SC58 | <i>S. frugiperda</i> | China:GuangXi:Nanning      | N 22°48'02" | E 108°11'30" | 2019/7/13 | muscle tissue | Unknown | Larvae |
| SC59 | <i>S. frugiperda</i> | China:GuangXi:Nanning      | N 22°48'02" | E 108°11'30" | 2019/7/14 | muscle tissue | Unknown | Larvae |
| SC60 | <i>S. frugiperda</i> | China:GuangXi:Nanning      | N 22°48'02" | E 108°11'30" | 2019/7/15 | muscle tissue | Unknown | Larvae |
| XS01 | <i>S. frugiperda</i> | China:YunNan:Xishuangbanna | N 21°45'94" | E 101°56'46" | 2019/7/7  | whole body    | Unknown | Adult  |
| YA01 | <i>S. frugiperda</i> | China:YunNan:Yaoan         | N 25°50'42" | E 101°24'15" | 2019/7/1  | whole body    | Unknown | Adult  |
| YJ01 | <i>S. frugiperda</i> | China:YunNan:Yuanjiang     | N 23°59'66" | E 101°99'80" | 2019/3/17 | whole body    | Unknown | Larvae |
| YJ02 | <i>S. frugiperda</i> | China:YunNan:Yuanjiang     | N 23°59'66" | E 101°99'80" | 2019/3/17 | whole body    | Unknown | Larvae |
| YX01 | <i>S. frugiperda</i> | China:YunNan:Yuxi          | N 24°34'12" | E 102°54'25" | 2019/5/16 | whole body    | Unknown | Larvae |
| YX02 | <i>S. frugiperda</i> | China:YunNan:Yuxi          | N 24°34'12" | E 102°54'25" | 2019/5/16 | whole body    | Unknown | Larvae |
| YX03 | <i>S. frugiperda</i> | China:YunNan:Yuxi          | N 24°34'12" | E 102°54'25" | 2019/5/16 | whole body    | Unknown | Larvae |
| YX04 | <i>S. frugiperda</i> | China:YunNan:Yuxi          | N 24°34'12" | E 102°54'25" | 2019/5/16 | whole body    | Unknown | Larvae |
| YX05 | <i>S. frugiperda</i> | China:YunNan:Yuxi          | N 24°34'12" | E 102°54'25" | 2019/5/16 | whole body    | Unknown | Larvae |





|      |                      |                        |             |              |           |            |         |        |
|------|----------------------|------------------------|-------------|--------------|-----------|------------|---------|--------|
| SF67 | <i>S. frugiperda</i> | China:YunNan:Yuanjiang | N 23°59'66" | E 101°99'80" | 2019/3/17 | whole body | Unknown | Larvae |
| SF68 | <i>S. frugiperda</i> | China:YunNan:Yuanjiang | N 23°59'66" | E 101°99'80" | 2019/3/17 | whole body | Unknown | Larvae |
| SF69 | <i>S. frugiperda</i> | China:YunNan:Yuanjiang | N 23°59'66" | E 101°99'80" | 2019/3/17 | whole body | Unknown | Larvae |
| SF70 | <i>S. frugiperda</i> | China:YunNan:Yuanjiang | N 23°59'66" | E 101°99'80" | 2019/3/17 | whole body | Unknown | Larvae |
| SF71 | <i>S. frugiperda</i> | China:YunNan:Yuanjiang | N 23°59'66" | E 101°99'80" | 2019/3/17 | whole body | Unknown | Larvae |
| SF72 | <i>S. frugiperda</i> | China:YunNan:Yuanjiang | N 23°59'66" | E 101°99'80" | 2019/3/17 | whole body | Unknown | Larvae |
| SF73 | <i>S. frugiperda</i> | China:YunNan:Yuanjiang | N 23°59'66" | E 101°99'80" | 2019/3/17 | whole body | Unknown | Larvae |
| SF74 | <i>S. frugiperda</i> | China:YunNan:Yuanjiang | N 23°59'66" | E 101°99'80" | 2019/3/17 | whole body | Unknown | Larvae |
| SF75 | <i>S. frugiperda</i> | China:YunNan:Yuanjiang | N 23°59'66" | E 101°99'80" | 2019/3/17 | whole body | Unknown | Larvae |
| SF76 | <i>S. frugiperda</i> | China:YunNan:Yuanjiang | N 23°59'66" | E 101°99'80" | 2019/3/17 | whole body | Unknown | Larvae |
| SF77 | <i>S. frugiperda</i> | China:YunNan:Yuanjiang | N 23°59'66" | E 101°99'80" | 2019/3/17 | whole body | Unknown | Larvae |
| SF78 | <i>S. frugiperda</i> | China:YunNan:Yuanjiang | N 23°59'66" | E 101°99'80" | 2019/3/17 | whole body | Unknown | Larvae |
| SF82 | <i>S. frugiperda</i> | China:YunNan:Yuanjiang | N 23°59'66" | E 101°99'80" | 2019/3/17 | whole body | Unknown | Larvae |
| SF83 | <i>S. frugiperda</i> | China:YunNan:Yuanjiang | N 23°59'66" | E 101°99'80" | 2019/3/17 | whole body | Unknown | Larvae |
| SF84 | <i>S. frugiperda</i> | China:YunNan:Yuanjiang | N 23°59'66" | E 101°99'80" | 2019/3/17 | whole body | Unknown | Larvae |
| SF85 | <i>S. frugiperda</i> | China:YunNan:Yuanjiang | N 23°59'66" | E 101°99'80" | 2019/3/17 | whole body | Unknown | Larvae |
| SF86 | <i>S. frugiperda</i> | China:YunNan:Yuanjiang | N 23°59'66" | E 101°99'80" | 2019/3/17 | whole body | Unknown | Larvae |
| SF87 | <i>S. frugiperda</i> | China:YunNan:Yuanjiang | N 23°59'66" | E 101°99'80" | 2019/3/17 | whole body | Unknown | Larvae |

---

**Table S21 | Databases of comparative genomics analysis contains *Spodoptera frugiperda* and other seven species including *Bombyx mori*, *Danaus plexippus*, *Drosophila melanogaster*, *Helicoverpa armigera*, *Manduca sexta*, *Plutella xylostella* and *Spodoptera litura*.**

| Species                        | Version     | Wingspan(mm) |
|--------------------------------|-------------|--------------|
| <i>Bombyx mori</i>             | PRJDA20217  | 40-50        |
| <i>Danaus plexippus</i>        | PRJNA72423  | 86-124       |
| <i>Drosophila melanogaster</i> | PRJNA13812  | 5-10         |
| <i>Helicoverpa armigera</i>    | PRJNA378437 | 27-38        |
| <i>Manduca sexta</i>           | PRJNA81037  | 100-120      |
| <i>Plutella xylostella</i>     | PRJNA78271  | 12-16        |
| <i>Spodoptera frugiperda</i>   | Our Study   | 37-42        |
| <i>Spodoptera litura</i>       | PRJNA416314 | 32-40        |
